# Supplementary material for: Whole-Genome Sequence and Variant Analysis of W303, a Widely-Used Strain of Saccharomyces cerevisiae
Source: Oxford University Press journal article supplement (doi:10.1534/g3.117.040022), 2017-06-06
Supplement: 040022_files1.xlsx [file 040022_files1.xlsx]

## Sheet: polymorphic_sites
Chromosome	Position in S288c	Base in S288c	Position in W303	Base in W303
chrI	19971	C	20604	T
chrI	25340	C	25975	A
chrI	25506	C	27626	T
chrI	25512	T	27632	C
chrI	25519	G	27639	A
chrI	25521	A	27641	G
chrI	25523	C	27643	T
chrI	25524	C	27644	G
chrI	25525	A	27645	G
chrI	25526	A	27646	T
chrI	25527	A	27647	G
chrI	25529	C	27649	T
chrI	25530	T	27650	A
chrI	25531	T	27651	G
chrI	25534	C	27654	G
chrI	25536	G	27656	T
chrI	141030	T	141706	A
chrI	141135	A	141811	T
chrI	152348	G	153372	A
chrI	163774	C	164798	G
chrI	181746	C	182770	T
chrI	181772	T	182796	C
chrI	182040	C	183062	T
chrI	182045	A	183067	G
chrI	195585	C	196605	T
chrI	195677	A	196697	G
chrI	196779	G	197799	A
chrI	196858	C	197878	T
chrI	196884	C	197904	T
chrI	196891	G	197911	T
chrI	196899	C	197919	T
chrI	196901	A	197921	C
chrI	196924	T	197944	C
chrI	197024	A	198044	G
chrI	197032	C	198052	T
chrI	197120	G	198140	A
chrI	197123	G	198143	A
chrI	197216	A	198236	G
chrI	197236	G	198256	T
chrI	197242	T	198262	G
chrI	197243	C	198263	T
chrI	197277	T	198297	C
chrI	197344	C	198364	T
chrI	197350	G	198370	A
chrI	197428	A	198448	T
chrI	197459	T	198479	C
chrI	197476	T	198496	C
chrI	197484	T	198504	C
chrI	197497	G	198517	A
chrI	197560	A	198580	G
chrI	197587	G	198607	A
chrI	197646	T	198666	G
chrI	197656	A	198676	G
chrI	197694	G	198714	T
chrI	197695	A	198715	G
chrI	197758	A	198778	G
chrI	197760	G	198780	C
chrI	197765	C	198785	G
chrI	197770	A	198790	G
chrI	197772	A	198792	G
chrI	197783	G	198803	A
chrI	197791	A	198811	G
chrI	197811	G	198831	A
chrI	197819	A	198839	G
chrI	197825	G	198845	A
chrI	197873	G	198893	A
chrI	197908	C	198928	T
chrI	197921	C	198941	A
chrI	197983	T	199004	A
chrI	198013	T	199034	A
chrI	198022	A	199043	G
chrI	198027	C	199048	T
chrI	198118	G	199140	A
chrI	198168	G	199190	T
chrI	198190	T	199212	C
chrI	198215	C	199237	A
chrI	198232	C	199254	G
chrI	198244	G	199266	T
chrI	198252	C	199274	G
chrI	198253	T	199275	C
chrI	198259	T	199281	C
chrI	198267	A	199289	G
chrI	198279	A	199301	G
chrI	198287	A	199309	G
chrI	198291	G	199313	A
chrI	198307	A	199329	G
chrI	198331	G	199353	T
chrI	198347	G	199369	T
chrI	198351	G	199373	A
chrI	198418	A	199440	C
chrI	198456	T	199478	A
chrI	198468	C	199490	G
chrI	198482	G	199504	A
chrI	198533	C	199555	T
chrI	198536	C	199558	T
chrI	198548	C	199570	A
chrI	198557	C	199579	T
chrI	198560	T	199582	C
chrI	198562	G	199584	A
chrI	198582	G	199604	A
chrI	198586	A	199608	G
chrI	198589	A	199611	G
chrI	198601	T	199623	A
chrI	198603	T	199625	G
chrI	198604	C	199626	T
chrI	198619	C	199641	T
chrI	198620	T	199642	G
chrI	198623	A	199645	T
chrI	198627	A	199649	G
chrI	198628	C	199650	G
chrI	198631	C	199653	T
chrI	198632	T	199654	G
chrI	198635	G	199657	A
chrI	198636	G	199659	A
chrI	198642	T	199665	C
chrI	198648	C	199671	T
chrI	198652	A	199675	G
chrI	198657	C	199680	T
chrI	198664	A	199687	G
chrII	6440	G	6744	C
chrII	7510	G	7814	A
chrII	7511	G	7815	A
chrII	15101	T	15405	G
chrII	15510	G	15814	T
chrII	15518	A	15822	G
chrII	16380	C	16684	T
chrII	16392	A	16696	G
chrII	30012	C	30731	T
chrII	30050	A	30769	G
chrII	30210	T	30929	C
chrII	30658	G	31377	T
chrII	30660	T	31379	C
chrII	30723	G	31442	A
chrII	30754	G	31473	A
chrII	30848	C	31567	G
chrII	31140	T	31859	C
chrII	31260	A	31979	G
chrII	31525	T	32244	C
chrII	34298	G	35017	A
chrII	35485	C	36204	T
chrII	59755	T	60728	C
chrII	137683	A	139054	G
chrII	150036	T	151889	A
chrII	155739	T	157592	G
chrII	155783	A	157636	G
chrII	156017	C	157870	T
chrII	156194	C	158047	T
chrII	156203	C	158056	A
chrII	156652	C	158505	T
chrII	156776	A	158629	G
chrII	157617	T	159470	C
chrII	158200	C	160053	T
chrII	158707	G	160560	A
chrII	158800	G	160653	T
chrII	158803	A	160656	G
chrII	158986	C	160839	T
chrII	159067	G	160920	A
chrII	159079	C	160932	T
chrII	159139	T	160992	G
chrII	159226	G	161079	A
chrII	159397	T	161250	C
chrII	159412	G	161265	A
chrII	159427	A	161280	G
chrII	159926	C	161779	A
chrII	159931	T	161784	G
chrII	159953	C	161806	T
chrII	159957	A	161810	G
chrII	160020	C	161873	T
chrII	160143	T	161996	G
chrII	160403	G	162256	T
chrII	160509	A	162362	G
chrII	160618	C	162471	T
chrII	160810	T	162663	G
chrII	161463	T	163315	C
chrII	161484	T	163336	G
chrII	161687	T	163539	C
chrII	161757	G	163609	A
chrII	161840	T	163692	C
chrII	162251	A	164103	G
chrII	162271	A	164123	G
chrII	162420	T	164272	C
chrII	162680	A	164532	G
chrII	162773	T	164625	C
chrII	163121	A	164973	G
chrII	163854	T	165706	C
chrII	163967	A	165819	G
chrII	163989	G	165841	A
chrII	164419	T	166271	C
chrII	164474	A	166326	G
chrII	164851	T	166703	A
chrII	164975	T	166827	C
chrII	164995	T	166847	G
chrII	165049	C	166900	T
chrII	165178	C	167029	G
chrII	165525	G	167376	A
chrII	165586	T	167437	A
chrII	165680	A	167531	C
chrII	165729	T	167580	C
chrII	165877	T	167728	C
chrII	166019	T	167883	C
chrII	166311	C	168173	T
chrII	166396	A	168258	T
chrII	166460	C	168322	T
chrII	166550	G	168412	A
chrII	166572	C	168434	T
chrII	166607	T	168469	C
chrII	166703	G	168565	A
chrII	167174	A	169036	G
chrII	167373	C	169234	T
chrII	167426	G	169288	A
chrII	167527	G	169389	A
chrII	167650	C	169512	T
chrII	167794	A	169656	G
chrII	167821	A	169683	T
chrII	167924	A	169786	T
chrII	167998	G	169862	A
chrII	168065	T	169929	C
chrII	168150	C	170014	G
chrII	168194	G	170058	A
chrII	168448	T	170312	C
chrII	168467	T	170331	G
chrII	169483	A	171347	G
chrII	169496	G	171360	C
chrII	169621	C	171485	T
chrII	169818	C	171682	G
chrII	169820	G	171684	T
chrII	169893	T	171757	C
chrII	169999	T	171844	G
chrII	170152	T	171997	C
chrII	170167	C	172012	G
chrII	170179	T	172024	C
chrII	170206	G	172051	T
chrII	170442	T	172287	C
chrII	170593	A	172438	G
chrII	170676	G	172521	A
chrII	170790	T	172635	C
chrII	170868	C	172713	T
chrII	171433	A	173278	G
chrII	171495	A	173340	T
chrII	171570	A	173415	G
chrII	171612	G	173457	C
chrII	171924	G	173769	A
chrII	172113	T	173958	C
chrII	172171	C	174016	T
chrII	172178	C	174023	A
chrII	172223	A	174068	G
chrII	172245	C	174090	T
chrII	172262	A	174107	G
chrII	172302	A	174147	G
chrII	172307	T	174152	C
chrII	172322	G	174167	T
chrII	172323	T	174168	A
chrII	172338	T	174183	G
chrII	172488	A	174332	G
chrII	172681	G	174525	A
chrII	173028	T	174872	C
chrII	173043	A	174887	G
chrII	173659	T	175503	C
chrII	174535	C	176373	T
chrII	175160	T	176997	A
chrII	175505	C	177342	A
chrII	175526	A	177363	G
chrII	175964	T	177801	C
chrII	176084	T	177921	C
chrII	176261	T	178098	C
chrII	176546	T	178383	C
chrII	176636	G	178473	A
chrII	177287	C	179124	G
chrII	177793	G	179630	A
chrII	178099	A	179936	G
chrII	178447	A	180284	G
chrII	178930	C	180767	T
chrII	179110	G	180947	A
chrII	179146	G	180983	A
chrII	179233	T	181070	C
chrII	179248	A	181085	G
chrII	179257	C	181094	T
chrII	179266	A	181103	G
chrII	180070	T	181907	G
chrII	180168	A	182005	G
chrII	180244	T	182081	C
chrII	180298	C	182135	T
chrII	180312	C	182149	T
chrII	180372	T	182209	A
chrII	180379	A	182216	G
chrII	180607	G	182444	A
chrII	181279	C	183116	T
chrII	181302	A	183139	G
chrII	181425	A	183262	C
chrII	181705	C	183542	G
chrII	182128	T	183965	C
chrII	182360	T	184197	C
chrII	182436	T	184273	C
chrII	182643	C	184480	T
chrII	182700	T	184537	C
chrII	182892	G	184729	A
chrII	182901	C	184738	T
chrII	183084	A	184921	C
chrII	184236	G	186073	C
chrII	184932	A	186769	C
chrII	184941	T	186778	A
chrII	185478	C	187315	G
chrII	185922	A	187759	G
chrII	186753	G	188590	A
chrII	187142	C	188979	T
chrII	187153	G	188990	A
chrII	187552	T	189389	A
chrII	187714	C	189551	T
chrII	187744	T	189581	C
chrII	187873	T	189710	C
chrII	187957	G	189794	A
chrII	188032	G	189869	A
chrII	189113	C	190950	A
chrII	189209	T	191046	A
chrII	189223	C	191060	T
chrII	189661	T	191498	C
chrII	189673	A	191510	G
chrII	190032	T	191869	C
chrII	190128	T	191965	A
chrII	190246	C	192083	T
chrII	190452	A	192289	G
chrII	190583	G	192420	A
chrII	190620	C	192457	G
chrII	190641	A	192478	G
chrII	190670	T	192507	C
chrII	190881	G	192718	A
chrII	191207	T	193044	C
chrII	191232	A	193069	G
chrII	191242	C	193079	A
chrII	191470	A	193307	T
chrII	191528	G	193365	A
chrII	191563	G	193400	T
chrII	191613	G	193450	A
chrII	192289	G	194126	C
chrII	192398	T	194235	A
chrII	192399	A	194236	G
chrII	192441	G	194278	A
chrII	192576	A	194413	G
chrII	193122	T	194959	C
chrII	193664	T	195501	C
chrII	194226	C	196061	T
chrII	209404	T	211239	C
chrII	222303	C	224136	G
chrII	222304	G	224137	C
chrII	225536	A	227369	G
chrII	252572	T	254370	G
chrII	252578	C	254376	T
chrII	252589	T	254387	C
chrII	252599	T	254397	C
chrII	252680	A	254478	G
chrII	252704	G	254502	T
chrII	252792	T	254590	G
chrII	253095	C	254893	T
chrII	253219	G	255017	A
chrII	253709	G	255507	A
chrII	254030	C	255828	T
chrII	254124	T	255922	C
chrII	254349	C	256147	T
chrII	254368	C	256166	T
chrII	254409	C	256207	T
chrII	254436	T	256234	C
chrII	254834	A	256632	G
chrII	254899	T	256697	A
chrII	255058	A	256856	G
chrII	255127	A	256925	G
chrII	255469	G	257267	A
chrII	255688	T	257486	A
chrII	255740	G	257538	A
chrII	255743	C	257541	T
chrII	255828	T	257626	C
chrII	256267	C	258066	A
chrII	256925	T	258725	C
chrII	256941	A	258741	T
chrII	257176	G	258976	A
chrII	257430	C	259230	T
chrII	257565	T	259365	C
chrII	257913	T	259713	C
chrII	258153	T	259953	C
chrII	258208	A	260008	C
chrII	258211	A	260011	G
chrII	258313	G	260113	C
chrII	258409	C	260209	A
chrII	258653	C	260453	T
chrII	258667	A	260467	G
chrII	258757	T	260557	C
chrII	258758	T	260558	C
chrII	258767	A	260567	T
chrII	258778	C	260578	T
chrII	258785	A	260585	G
chrII	258790	G	260590	T
chrII	258791	A	260591	G
chrII	258792	T	260592	C
chrII	258794	G	260594	A
chrII	258797	A	260597	C
chrII	258802	T	260602	C
chrII	258815	G	260621	A
chrII	258824	T	260624	A
chrII	258827	C	260627	A
chrII	258839	G	260639	A
chrII	258840	T	260640	A
chrII	258841	C	260641	T
chrII	258843	C	260643	T
chrII	266324	T	260868	C
chrII	266331	A	260875	G
chrII	266339	T	260883	A
chrII	266351	C	260895	G
chrII	266358	C	260902	G
chrII	266478	G	261023	A
chrII	266551	C	261096	G
chrII	266590	C	261135	T
chrII	266718	A	261263	G
chrII	266773	G	261318	A
chrII	266791	G	261336	A
chrII	267105	T	261650	C
chrII	267339	C	261884	T
chrII	267510	C	262056	T
chrII	267673	T	262219	C
chrII	268100	G	262646	A
chrII	268319	A	262865	G
chrII	268644	G	263190	T
chrII	268844	C	263390	G
chrII	268895	G	263441	A
chrII	268913	G	263459	A
chrII	268925	C	263471	T
chrII	268930	A	263476	G
chrII	268949	T	263495	C
chrII	269066	A	263612	G
chrII	269255	G	263801	A
chrII	269653	C	264199	T
chrII	269986	G	264532	A
chrII	270169	C	264715	T
chrII	270245	C	264791	A
chrII	270315	G	264861	T
chrII	271427	C	265981	T
chrII	271526	C	266080	T
chrII	297970	A	292526	T
chrII	298141	C	292697	T
chrII	298721	G	293277	A
chrII	298966	T	293522	C
chrII	298990	G	293546	A
chrII	299034	A	293590	G
chrII	299174	T	293730	C
chrII	299196	T	293752	C
chrII	299389	A	293945	G
chrII	299524	C	294080	T
chrII	299680	T	294248	G
chrII	299708	G	294276	A
chrII	299759	C	294327	T
chrII	299803	C	294371	A
chrII	300111	G	294673	A
chrII	300849	C	295411	T
chrII	301002	T	295564	C
chrII	301044	C	295606	T
chrII	364671	C	382073	T
chrII	389429	C	406831	G
chrII	389430	G	406832	C
chrII	432798	G	450199	A
chrII	493379	C	510780	T
chrII	513345	C	530746	T
chrII	555360	T	573162	G
chrII	559867	G	577669	T
chrII	621166	T	638966	A
chrII	621285	G	639085	A
chrII	621546	C	639346	T
chrII	621963	C	639763	T
chrII	622305	T	640105	A
chrII	622655	G	640455	A
chrII	622789	G	640589	T
chrII	622849	A	640649	T
chrII	622888	C	640688	A
chrII	622971	T	640771	C
chrII	622981	A	640781	C
chrII	623027	T	640827	C
chrII	623272	C	641072	A
chrII	623278	T	641078	C
chrII	623413	A	641213	T
chrII	623418	A	641218	T
chrII	623427	A	641227	G
chrII	623785	C	641585	T
chrII	623818	A	641618	G
chrII	623968	G	641768	T
chrII	624009	C	641809	T
chrII	624052	A	641852	T
chrII	624076	T	641876	C
chrII	624215	A	642015	G
chrII	624493	C	642293	T
chrII	624540	A	642340	T
chrII	624736	C	642536	T
chrII	624740	A	642540	G
chrII	624762	T	642562	C
chrII	624798	A	642598	G
chrII	624805	G	642605	A
chrII	624836	C	642636	A
chrII	625077	T	642878	C
chrII	625150	C	642951	G
chrII	625203	C	643004	A
chrII	625210	G	643011	A
chrII	625234	T	643035	G
chrII	625298	A	643099	G
chrII	625597	G	643398	A
chrII	625628	A	643429	C
chrII	625690	C	643491	A
chrII	625721	C	643522	T
chrII	625733	G	643534	C
chrII	625761	T	643562	C
chrII	625843	T	643644	C
chrII	625876	T	643677	C
chrII	626092	A	643893	G
chrII	626278	C	644079	T
chrII	626455	G	644256	A
chrII	626470	C	644271	T
chrII	626608	T	644409	C
chrII	626629	C	644430	A
chrII	626656	G	644457	A
chrII	626680	A	644481	T
chrII	627001	T	644802	A
chrII	627055	A	644856	T
chrII	628267	T	646068	C
chrII	628269	T	646070	C
chrII	628345	T	646146	C
chrII	628674	T	646473	C
chrII	628807	T	646606	C
chrII	628943	C	646747	G
chrII	629013	G	646817	A
chrII	629133	A	646937	G
chrII	629145	A	646949	G
chrII	629259	G	647063	A
chrII	629636	C	647440	T
chrII	629641	G	647445	A
chrII	629782	T	647586	C
chrII	630052	C	647856	T
chrII	630091	T	647895	C
chrII	630094	A	647898	G
chrII	630671	T	648475	A
chrII	630784	C	648588	T
chrII	630833	C	648637	T
chrII	631243	C	649047	T
chrII	631321	T	649125	C
chrII	631353	G	649157	A
chrII	631572	A	649376	T
chrII	631668	T	649472	C
chrII	631864	T	649668	C
chrII	631870	A	649674	G
chrII	632170	G	649974	A
chrII	633957	G	651761	A
chrII	633960	C	651764	T
chrII	634225	C	652029	T
chrII	634599	G	652403	A
chrII	635127	G	652931	A
chrII	635445	A	653249	G
chrII	635478	C	653282	T
chrII	635928	C	653732	A
chrII	635959	G	653763	T
chrII	636168	C	653972	T
chrII	636267	C	654071	T
chrII	636372	T	654176	C
chrII	636537	A	654341	G
chrII	636709	C	654513	G
chrII	636994	T	654798	C
chrII	637041	C	654845	T
chrII	637063	T	654867	A
chrII	637264	T	655068	C
chrII	637366	T	655170	C
chrII	637651	C	655455	G
chrII	637785	T	655589	C
chrII	637795	C	655599	A
chrII	637928	T	655732	G
chrII	637990	C	655794	T
chrII	638086	A	655890	G
chrII	638716	A	656520	G
chrII	639220	C	657024	G
chrII	639337	C	657141	T
chrII	639427	A	657231	G
chrII	639700	C	657504	T
chrII	639745	G	657549	A
chrII	639793	G	657597	A
chrII	639832	G	657636	A
chrII	640834	T	658638	C
chrII	641071	T	658875	G
chrII	641302	C	659106	T
chrII	641433	A	659237	G
chrII	641467	A	659271	G
chrII	641842	C	659646	T
chrII	642049	C	659853	T
chrII	642256	T	660060	C
chrII	642483	G	660287	A
chrII	642492	A	660296	G
chrII	643134	G	660935	A
chrII	643176	G	660977	A
chrII	643432	G	667163	A
chrII	643914	G	667269	A
chrII	643915	T	667270	A
chrII	643931	T	667286	C
chrII	643991	A	667346	C
chrII	644145	G	667481	A
chrII	644333	G	667669	T
chrII	644482	G	667818	C
chrII	644529	C	667865	T
chrII	644646	C	667982	T
chrII	644790	T	668126	C
chrII	645021	C	668357	T
chrII	645058	C	668394	A
chrII	645081	T	668417	C
chrII	645289	G	668625	A
chrII	645341	A	668677	G
chrII	645461	C	668797	T
chrII	645464	T	668800	C
chrII	645592	C	668928	T
chrII	645738	A	669074	G
chrII	645842	C	669178	T
chrII	646209	C	669520	T
chrII	646327	C	669638	T
chrII	646524	G	669835	A
chrII	646843	A	670154	G
chrII	646863	G	670174	A
chrII	646935	A	670246	T
chrII	647284	C	670595	T
chrII	647496	A	670807	C
chrII	647502	G	670813	A
chrII	647924	A	671234	G
chrII	648554	C	671864	T
chrII	648674	C	671984	T
chrII	649054	G	672364	C
chrII	649292	A	672602	G
chrII	649517	A	672821	T
chrII	649588	C	672892	A
chrII	649931	T	673235	C
chrII	650401	A	673707	G
chrII	650411	A	673717	G
chrII	650970	T	674276	C
chrII	651616	T	674922	A
chrII	652021	C	675327	T
chrII	652362	C	675668	T
chrII	652467	T	675773	C
chrII	652587	T	675893	C
chrII	652686	T	675992	C
chrII	652830	T	676136	C
chrII	653007	G	676313	A
chrII	653133	C	676441	T
chrII	653239	G	676546	A
chrII	653275	A	676582	G
chrII	653427	T	676734	C
chrII	653429	G	676736	C
chrII	653440	C	676747	A
chrII	653730	A	677037	G
chrII	653876	G	677183	A
chrII	654127	C	677434	T
chrII	654312	C	677619	T
chrII	654339	C	677646	G
chrII	654351	T	677658	C
chrII	654360	T	677667	C
chrII	654388	A	677695	G
chrII	654468	C	677775	A
chrII	654500	G	677807	A
chrII	654507	T	677814	C
chrII	654523	G	677830	T
chrII	654525	C	677832	T
chrII	655451	G	678758	A
chrII	655511	G	678818	A
chrII	655893	T	679202	C
chrII	655999	T	679308	C
chrII	656068	T	679377	C
chrII	656242	A	679551	G
chrII	656467	G	679776	A
chrII	656530	G	679839	A
chrII	656574	T	679883	C
chrII	656619	A	679928	C
chrII	656779	T	680088	C
chrII	657120	G	680430	T
chrII	657562	A	680872	G
chrII	657582	T	680892	A
chrII	658786	T	682096	C
chrII	658797	G	682107	A
chrII	660105	G	683415	A
chrII	660237	A	683547	G
chrII	660819	C	684129	T
chrII	660870	T	684180	A
chrII	661854	G	685164	T
chrII	661878	G	685188	A
chrII	662073	G	685383	A
chrII	662094	A	685404	G
chrII	662112	G	685422	A
chrII	662272	C	685582	T
chrII	662354	G	685664	A
chrII	662444	G	685754	A
chrII	662477	T	685787	A
chrII	662669	C	685979	T
chrII	662749	G	686059	A
chrII	663226	G	686536	A
chrII	663370	A	686680	G
chrII	663448	G	686758	A
chrII	663478	C	686788	T
chrII	664018	T	687328	C
chrII	664165	T	687475	C
chrII	664714	A	688024	T
chrII	664724	C	688034	T
chrII	666708	A	690017	G
chrII	667779	A	691088	G
chrII	667800	C	691109	A
chrII	668585	A	691894	G
chrII	668650	G	691959	A
chrII	668867	T	692642	C
chrII	668968	C	692743	T
chrII	668984	A	692759	G
chrII	669668	G	693443	A
chrII	670083	T	693858	C
chrII	670302	G	694077	A
chrII	670311	A	694086	G
chrII	670742	T	694517	C
chrII	671044	C	694822	A
chrII	671376	T	695154	C
chrII	672003	A	695781	G
chrII	672013	T	695791	C
chrII	672200	A	695978	C
chrII	672318	G	696096	A
chrII	673212	C	696990	T
chrII	673311	G	697089	A
chrII	673390	G	697168	T
chrII	673806	C	697584	G
chrII	674295	T	698073	A
chrII	675193	G	698971	A
chrII	676110	G	699888	A
chrII	676125	T	699903	C
chrII	676341	A	700119	C
chrII	677266	T	701044	C
chrII	677644	C	701422	G
chrII	677719	A	701497	G
chrII	678781	T	702559	G
chrII	678799	C	702577	T
chrII	679276	A	703054	C
chrII	679385	A	703163	C
chrII	679529	T	703307	C
chrII	680550	T	704325	C
chrII	680726	A	704501	G
chrII	680919	T	704694	C
chrII	681127	T	704902	A
chrII	681206	A	704981	T
chrII	681344	T	705119	G
chrII	681398	C	705173	T
chrII	681414	A	705189	G
chrII	681488	T	705263	A
chrII	681492	A	705267	G
chrII	681557	G	705332	A
chrII	682145	G	705922	T
chrII	682192	C	705969	T
chrII	682449	T	706226	C
chrII	682968	G	706745	A
chrII	683268	A	707045	G
chrII	683415	C	707192	T
chrII	683586	T	707363	C
chrII	684585	G	708362	T
chrII	684795	A	708572	G
chrII	684797	G	708574	A
chrII	685165	A	708943	G
chrII	685306	T	709084	C
chrII	685510	C	709287	T
chrII	685662	T	709439	C
chrII	686158	G	709935	A
chrII	686563	G	710340	A
chrII	686624	C	710401	T
chrII	686767	A	710545	G
chrII	686783	G	710561	A
chrII	687029	C	710807	T
chrII	687350	T	711128	C
chrII	687626	A	711404	T
chrII	687872	T	711650	A
chrII	687980	G	711758	A
chrII	688355	C	712133	T
chrII	688364	G	712142	A
chrII	688475	G	712253	A
chrII	688487	C	712265	T
chrII	688640	G	712418	A
chrII	688700	A	712478	T
chrII	688949	T	712727	A
chrII	689085	A	712863	C
chrII	689156	C	712934	T
chrII	689867	G	713645	C
chrII	689912	G	713690	A
chrII	689996	A	713774	C
chrII	690123	T	713901	C
chrII	690313	T	714091	C
chrII	690330	G	714108	A
chrII	691208	T	714986	C
chrII	691367	C	715145	T
chrII	691485	G	715263	T
chrII	691521	A	715299	G
chrII	691649	G	715427	A
chrII	691707	G	715485	C
chrII	691742	T	715520	C
chrII	691776	G	715554	T
chrII	691838	G	715616	A
chrII	691869	G	715647	A
chrII	691880	A	715658	G
chrII	691893	T	715671	C
chrII	691937	C	715715	T
chrII	691950	C	715728	T
chrII	692083	C	715861	A
chrII	692126	G	715904	C
chrII	692195	A	715973	G
chrII	692366	A	716144	T
chrII	692680	C	716458	T
chrII	692883	C	716661	T
chrII	692889	C	716667	T
chrII	693069	A	716847	T
chrII	693391	G	717169	A
chrII	693469	C	717247	T
chrII	693651	T	717429	C
chrII	693825	T	717603	A
chrII	693923	T	717701	C
chrII	693925	G	717703	A
chrII	693928	C	717706	T
chrII	694124	G	717902	A
chrII	694133	G	717911	A
chrII	694151	T	717929	A
chrII	694153	T	717931	C
chrII	694443	A	718221	T
chrII	694512	A	718290	G
chrII	694669	G	718447	A
chrII	694728	G	718506	A
chrII	695368	T	719146	C
chrII	695575	T	719353	C
chrII	695857	A	719635	T
chrII	696541	T	720319	C
chrII	696652	T	720430	C
chrII	696781	A	720559	G
chrII	697043	T	720821	C
chrII	697455	C	721233	T
chrII	697695	C	721473	T
chrII	697855	C	721633	A
chrII	697900	T	721678	G
chrII	697912	C	721690	T
chrII	697933	C	721711	A
chrII	698208	C	721984	T
chrII	698648	A	722423	T
chrII	698958	T	722733	C
chrII	699308	T	723083	C
chrII	699380	G	723155	A
chrII	699560	T	723335	C
chrII	699675	T	723450	C
chrII	699878	A	723653	G
chrII	700005	A	723780	G
chrII	700064	G	723839	C
chrII	700097	T	723872	C
chrII	700199	A	723974	T
chrII	700223	G	723998	C
chrII	700246	T	724021	C
chrII	700349	C	724140	T
chrII	700423	T	724214	C
chrII	700682	G	724473	A
chrII	700715	C	724506	T
chrII	700736	G	724527	A
chrII	750883	G	775077	A
chrII	752417	T	776611	C
chrII	752501	G	776695	C
chrII	753942	C	778136	T
chrII	753990	T	778184	C
chrII	754029	A	778223	G
chrII	754103	A	778297	T
chrII	754139	G	778333	A
chrII	754188	G	778382	A
chrII	754197	T	778391	C
chrII	754355	G	778549	A
chrII	754404	A	778598	G
chrII	754416	A	778610	G
chrII	754436	T	778630	C
chrII	754776	G	778970	A
chrII	754911	A	779105	G
chrII	756042	T	780236	C
chrII	756063	G	780257	A
chrII	756110	C	780304	T
chrII	756201	A	780395	G
chrII	756213	G	780407	A
chrII	756267	T	780461	C
chrII	756533	C	780727	A
chrII	756709	G	780903	A
chrII	757029	G	781223	A
chrII	757438	A	781632	G
chrII	757908	G	782102	A
chrII	758568	A	782762	G
chrII	758608	T	782802	C
chrII	758926	T	783120	A
chrII	758975	T	783169	G
chrII	759134	C	783328	T
chrII	759221	G	783415	T
chrII	759357	G	783551	A
chrII	759661	G	783855	T
chrII	759726	T	783920	C
chrII	760248	C	784442	T
chrII	760255	A	784449	T
chrII	760302	C	784496	T
chrII	760365	C	784559	T
chrII	760599	G	784793	A
chrII	760767	A	784961	G
chrII	760848	C	785042	T
chrII	760904	G	785098	A
chrII	760960	C	785154	T
chrII	761030	A	785224	T
chrII	761033	A	785227	T
chrII	761038	G	785232	T
chrII	761049	C	785243	T
chrII	761051	G	785245	A
chrII	761056	G	785250	A
chrII	761061	G	785255	A
chrII	761079	T	785273	A
chrII	761108	T	785304	C
chrII	761118	T	785315	C
chrII	761121	C	785318	T
chrII	761436	A	785633	G
chrII	761454	T	785651	C
chrII	761529	G	785726	A
chrII	761787	G	785984	A
chrII	761814	C	786011	T
chrII	761832	T	786029	C
chrII	761853	T	786050	C
chrII	761880	A	786077	G
chrII	761901	A	786098	G
chrII	761904	T	786101	C
chrII	761943	A	786140	G
chrII	761970	A	786167	G
chrII	762336	T	786533	C
chrII	762393	G	786590	A
chrII	762475	G	786690	A
chrII	762665	A	786880	G
chrII	763111	T	787326	A
chrII	763117	C	787332	T
chrII	763218	G	787433	A
chrII	763300	A	787515	G
chrII	763438	A	787653	G
chrII	763488	G	787703	A
chrII	763528	T	787743	C
chrII	763762	C	787977	T
chrII	763909	C	788124	T
chrII	764050	T	788265	C
chrII	764110	G	788325	A
chrII	764239	T	788454	C
chrII	766137	A	790352	G
chrII	766176	T	790391	C
chrII	766200	C	790415	G
chrII	766335	C	790550	A
chrII	766339	A	790554	G
chrII	767058	T	791273	C
chrII	767298	G	791513	A
chrII	767375	C	791590	T
chrII	767560	C	791775	T
chrII	767582	A	791797	C
chrII	767690	A	791905	T
chrII	767991	A	792205	G
chrII	768079	T	792294	C
chrII	768130	T	792345	A
chrII	768173	A	792388	T
chrII	768174	A	792389	G
chrII	768259	C	792473	T
chrII	768260	T	792474	G
chrII	768449	T	792663	C
chrII	769123	T	793337	A
chrIII	13001	A	12654	T
chrIII	44288	A	43940	G
chrIII	59315	A	58966	G
chrIII	69652	T	69303	C
chrIII	72645	C	72296	T
chrIII	84421	G	84512	A
chrIII	143131	T	143224	C
chrIII	148615	C	148708	T
chrIII	162361	T	169067	C
chrIII	162396	G	169102	C
chrIII	162640	T	169346	G
chrIII	162694	G	169400	A
chrIII	163059	T	169763	C
chrIII	198937	T	216815	G
chrIII	199358	G	217236	A
chrIII	200850	G	218623	C
chrIII	257960	T	275733	C
chrIII	258780	T	276553	G
chrIII	258828	G	276601	C
chrIII	258915	G	276688	A
chrIII	259351	G	277124	A
chrIII	259489	A	277261	G
chrIII	259496	T	277268	C
chrIII	259724	T	277496	C
chrIII	259975	G	277747	A
chrIII	260010	A	277783	G
chrIII	260400	G	278173	A
chrIII	260698	A	278471	C
chrIII	261312	G	279085	A
chrIII	261331	A	279104	G
chrIII	262105	C	279878	T
chrIII	262154	C	279927	T
chrIII	262229	T	280002	G
chrIII	262264	T	280037	C
chrIII	262761	A	280534	G
chrIII	262830	T	280603	G
chrIII	263029	A	280802	G
chrIII	263282	C	281055	T
chrIII	263790	A	281565	C
chrIII	264135	A	281910	T
chrIII	264282	C	282042	T
chrIII	264441	A	282201	G
chrIII	264610	T	282370	C
chrIII	264634	G	282394	A
chrIII	264642	T	282402	C
chrIII	264655	T	282415	C
chrIII	264887	T	282647	C
chrIII	265045	C	282805	T
chrIII	265091	T	282851	C
chrIII	265240	T	283000	C
chrIII	266048	C	283808	T
chrIII	266241	C	284001	T
chrIII	266271	G	284031	A
chrIII	266282	C	284042	T
chrIII	266283	G	284043	C
chrIII	266399	C	284159	G
chrIII	267375	T	285135	C
chrIII	271337	C	289097	G
chrIII	272101	C	289876	T
chrIII	273439	C	291213	T
chrIII	273446	A	291220	G
chrIII	273450	A	291224	T
chrIII	273452	T	291226	G
chrIII	273474	T	291248	C
chrIII	273518	T	291292	C
chrIII	273523	T	291297	G
chrIII	273706	A	291480	G
chrIII	273723	T	291497	G
chrIII	274374	T	292148	C
chrIII	274530	A	292304	G
chrIII	274723	G	292497	A
chrIII	278100	T	295874	C
chrIII	279258	T	297032	C
chrIII	280449	T	298743	G
chrIII	286652	G	304946	T
chrIII	290460	A	308754	G
chrIII	292183	G	310479	A
chrIII	292247	C	310543	G
chrIII	292282	C	310578	A
chrIII	292937	C	311230	T
chrIII	293842	A	312133	G
chrIII	294389	A	312680	T
chrIII	294593	T	312884	C
chrIII	296689	C	315422	A
chrIII	297919	G	316652	A
chrIII	298117	G	316850	A
chrIII	298326	G	317059	A
chrIII	298402	T	317135	C
chrIII	298408	A	317141	G
chrIII	298441	C	317174	T
chrIII	298548	G	317281	A
chrIII	298597	G	317330	A
chrIII	298726	T	317459	G
chrIII	298764	C	317497	T
chrIII	298878	C	317611	G
chrIII	298949	A	317682	C
chrIII	298996	A	317729	G
chrIII	299098	C	317831	T
chrIII	299155	C	317888	G
chrIII	299165	G	317898	T
chrIII	299184	C	317917	A
chrIII	299220	T	317953	C
chrIII	299262	A	317995	G
chrIII	299288	A	318021	G
chrIII	299395	G	318128	A
chrIII	299645	T	318378	C
chrIII	299687	C	318420	T
chrIII	299701	T	318434	C
chrIII	300695	G	319428	A
chrIII	300804	C	319537	G
chrIII	301452	A	320185	G
chrIII	301736	A	320469	G
chrIII	302896	G	321629	C
chrIII	302979	G	321712	A
chrIII	303499	C	322232	T
chrIII	303798	G	322531	A
chrIII	304102	A	322835	G
chrIII	304825	G	323557	C
chrIII	306561	T	325293	C
chrIII	306575	C	325307	T
chrIII	306783	G	325515	A
chrIII	306964	A	325696	G
chrIII	306967	T	325699	A
chrIII	306974	C	325706	T
chrIII	306978	C	325710	T
chrIII	306992	C	325724	T
chrIII	307016	G	325748	A
chrIII	307039	A	325771	T
chrIII	307149	A	325881	T
chrIII	307421	G	326153	A
chrIII	307422	C	326154	A
chrIII	307428	C	326160	T
chrIII	307429	T	326161	G
chrIII	307443	T	326175	C
chrIII	307465	C	326200	T
chrIII	307468	G	326203	A
chrIII	307477	T	326212	C
chrIII	307489	C	326224	T
chrIII	307630	G	326365	A
chrIII	307643	C	326376	A
chrIII	307644	T	326377	G
chrIII	307648	T	326381	C
chrIII	307649	G	326382	T
chrIII	307650	A	326383	G
chrIII	307652	C	326385	T
chrIII	307654	T	326387	C
chrIII	307656	T	326389	A
chrIII	307659	T	326392	C
chrIII	307661	A	326394	G
chrIII	307674	G	326406	A
chrIII	307678	T	326410	C
chrIII	307679	G	326411	A
chrIII	307681	T	326413	C
chrIII	307682	G	326414	A
chrIII	307685	A	326417	C
chrIII	307686	G	326418	C
chrIII	307690	G	326422	A
chrIII	307691	A	326423	G
chrIII	307696	C	326428	T
chrIII	307718	A	326450	T
chrIII	307719	A	326451	G
chrIII	307720	C	326452	T
chrIII	307721	T	326453	C
chrIII	307722	A	326454	C
chrIII	307723	T	326455	C
chrIII	307727	C	326459	T
chrIII	307731	T	326463	A
chrIII	307732	G	326464	A
chrIII	307735	G	326467	A
chrIII	307740	C	326472	T
chrIII	307741	G	326473	C
chrIII	307742	C	326474	T
chrIII	307746	C	326478	T
chrIII	307760	T	326490	C
chrIII	307763	T	326493	C
chrIII	307768	A	326498	C
chrIII	307772	C	326502	T
chrIII	307852	A	326582	G
chrIII	310319	G	329050	C
chrIII	311513	T	330244	C
chrIII	312423	G	331154	A
chrIII	313914	T	332645	C
chrIII	314456	C	333187	T
chrIII	315914	T	334643	C
chrIII	316117	C	334847	T
chrIII	316156	C	334886	A
chrIII	316159	C	334889	G
chrIII	316167	T	334899	C
chrIII	316174	A	334906	G
chrIII	316176	G	334908	A
chrIII	316179	A	334911	G
chrIII	316180	G	334912	C
chrIII	316194	G	334926	A
chrIII	316199	T	334931	G
chrIII	316239	C	334972	T
chrIII	316262	T	334995	A
chrIV	1624	T	1700	A
chrIV	1631	C	1707	T
chrIV	1633	T	1709	C
chrIV	1651	C	1727	T
chrIV	1724	C	1800	T
chrIV	1817	G	1898	C
chrIV	1819	C	1900	T
chrIV	1823	G	1904	A
chrIV	1831	A	1912	G
chrIV	1834	C	1915	T
chrIV	1843	G	1924	A
chrIV	2008	T	2090	G
chrIV	2009	A	2091	G
chrIV	2035	G	2117	T
chrIV	2045	C	2127	T
chrIV	2046	T	2129	G
chrIV	2060	G	2143	C
chrIV	2062	C	2145	T
chrIV	2066	G	2149	T
chrIV	2072	T	2155	C
chrIV	2076	G	2159	A
chrIV	2087	A	2170	G
chrIV	2112	T	2195	C
chrIV	2135	G	2218	A
chrIV	2151	C	2234	T
chrIV	2152	T	2235	G
chrIV	2156	C	2239	A
chrIV	2584	C	2669	A
chrIV	2800	C	2885	G
chrIV	3566	G	3651	A
chrIV	4142	T	4227	A
chrIV	4232	G	4317	C
chrIV	5408	A	5493	T
chrIV	7809	C	7895	T
chrIV	18195	A	18279	C
chrIV	18200	A	18284	G
chrIV	18219	A	18303	G
chrIV	18231	T	18315	A
chrIV	18264	T	18348	A
chrIV	18279	A	18363	G
chrIV	18291	G	18375	A
chrIV	18303	C	18387	T
chrIV	18312	C	18396	T
chrIV	18325	T	18409	C
chrIV	18333	A	18417	G
chrIV	18342	A	18426	G
chrIV	18345	G	18429	A
chrIV	18351	A	18435	G
chrIV	18357	A	18441	C
chrIV	18360	G	18444	T
chrIV	18361	C	18445	T
chrIV	18362	C	18446	T
chrIV	18363	A	18447	G
chrIV	18369	T	18453	A
chrIV	18376	T	18460	C
chrIV	18377	T	18461	C
chrIV	18387	T	18471	C
chrIV	18388	C	18472	G
chrIV	18389	C	18473	T
chrIV	18396	C	18480	T
chrIV	18399	G	18483	A
chrIV	18413	T	18497	C
chrIV	18414	T	18498	C
chrIV	18425	A	18509	G
chrIV	18426	C	18510	T
chrIV	18436	T	18520	G
chrIV	18437	T	18521	C
chrIV	18450	T	18534	G
chrIV	18457	A	18541	G
chrIV	18467	C	18551	G
chrIV	18468	T	18552	C
chrIV	18473	T	18557	A
chrIV	18474	T	18558	C
chrIV	18477	G	18561	A
chrIV	18481	C	18565	T
chrIV	18483	G	18567	A
chrIV	18499	C	18583	A
chrIV	18504	A	18588	T
chrIV	18507	T	18591	G
chrIV	18516	A	18600	G
chrIV	18531	A	18615	T
chrIV	18540	A	18624	G
chrIV	18571	C	18655	G
chrIV	18588	G	18672	A
chrIV	18590	T	18674	G
chrIV	18603	C	18687	T
chrIV	18605	G	18689	A
chrIV	18606	A	18690	G
chrIV	18612	C	18696	T
chrIV	18615	T	18699	A
chrIV	18624	T	18708	G
chrIV	18651	G	18735	A
chrIV	18663	C	18747	T
chrIV	18671	G	18755	C
chrIV	18675	T	18759	C
chrIV	18682	A	18766	G
chrIV	18683	G	18767	C
chrIV	19638	C	19722	T
chrIV	21510	A	21584	G
chrIV	23647	T	23721	C
chrIV	24841	G	24915	T
chrIV	26679	C	26754	T
chrIV	26950	C	27025	A
chrIV	27235	T	27310	C
chrIV	27879	G	27954	T
chrIV	28542	C	28617	T
chrIV	28639	T	28714	C
chrIV	30404	C	30479	T
chrIV	30826	A	30901	C
chrIV	31224	G	31299	T
chrIV	33211	A	33286	G
chrIV	33904	G	33977	C
chrIV	34063	C	34136	T
chrIV	37123	C	37196	T
chrIV	38160	A	38233	T
chrIV	38200	C	38273	T
chrIV	39021	G	39094	T
chrIV	40439	T	40512	C
chrIV	101433	T	101507	G
chrIV	164013	G	164143	A
chrIV	164045	T	164175	C
chrIV	164089	C	164219	T
chrIV	164238	C	164368	T
chrIV	164256	G	164386	A
chrIV	164281	C	164411	G
chrIV	164439	C	164569	T
chrIV	164580	C	164710	T
chrIV	164987	C	165118	T
chrIV	165265	A	165396	G
chrIV	165341	G	165472	A
chrIV	165386	T	165517	C
chrIV	165975	A	166106	G
chrIV	166100	T	166231	C
chrIV	166418	T	166549	C
chrIV	166427	G	166558	A
chrIV	166604	G	166735	A
chrIV	166634	T	166765	C
chrIV	167295	C	167426	T
chrIV	167859	G	167989	A
chrIV	168238	T	168368	C
chrIV	168256	G	168386	A
chrIV	170327	T	170448	C
chrIV	170349	G	170470	A
chrIV	170354	T	170475	C
chrIV	170455	T	170577	C
chrIV	170914	G	171036	A
chrIV	170953	G	171075	A
chrIV	171294	A	171416	G
chrIV	174272	T	174394	G
chrIV	174831	C	174953	T
chrIV	174887	C	175009	T
chrIV	174905	T	175027	C
chrIV	174995	T	175117	C
chrIV	174996	T	175118	C
chrIV	174998	G	175120	T
chrIV	175307	C	175429	G
chrIV	175412	G	175534	T
chrIV	175847	A	175969	G
chrIV	175946	C	176068	T
chrIV	176019	A	176141	G
chrIV	176064	A	176186	G
chrIV	176423	T	176545	C
chrIV	176519	T	176641	C
chrIV	176628	C	176750	T
chrIV	177160	T	177282	C
chrIV	177207	A	177329	G
chrIV	177330	C	177452	T
chrIV	177363	A	177485	G
chrIV	177756	C	177878	T
chrIV	177780	T	177902	C
chrIV	177807	C	177929	T
chrIV	178032	A	178154	G
chrIV	178058	A	178180	T
chrIV	178389	G	178511	A
chrIV	178453	T	178575	G
chrIV	178489	C	178611	G
chrIV	178580	A	178702	C
chrIV	178930	G	179052	A
chrIV	178974	A	179096	G
chrIV	179020	T	179142	C
chrIV	179105	C	179227	A
chrIV	179134	C	179256	T
chrIV	179240	T	179362	C
chrIV	179328	G	179450	C
chrIV	179480	G	179602	A
chrIV	179487	C	179609	G
chrIV	179632	C	179754	T
chrIV	179651	A	179773	G
chrIV	179674	G	179796	T
chrIV	179696	A	179818	C
chrIV	179714	A	179836	C
chrIV	179755	G	179877	A
chrIV	179890	A	180012	G
chrIV	180086	G	180208	A
chrIV	180121	G	180243	A
chrIV	180309	T	180431	C
chrIV	180382	A	180504	G
chrIV	180628	A	180750	G
chrIV	180644	A	180766	C
chrIV	181978	T	182094	G
chrIV	181988	C	182104	T
chrIV	182019	G	182135	C
chrIV	182498	A	182614	G
chrIV	182600	G	182716	C
chrIV	182859	G	182975	A
chrIV	183011	C	183127	T
chrIV	183466	G	183582	A
chrIV	183645	C	183761	T
chrIV	183726	G	183842	A
chrIV	183756	T	183872	C
chrIV	183759	G	183875	T
chrIV	183912	A	184028	G
chrIV	183975	C	184091	T
chrIV	184169	C	184285	T
chrIV	184221	A	184337	G
chrIV	184320	A	184436	G
chrIV	184697	A	184815	T
chrIV	184893	C	185010	T
chrIV	185023	T	185140	C
chrIV	185188	G	185305	A
chrIV	185256	C	185373	T
chrIV	185449	T	185566	C
chrIV	185452	G	185569	A
chrIV	185458	C	185575	G
chrIV	185497	G	185614	A
chrIV	185528	G	185645	A
chrIV	185548	T	185665	C
chrIV	185567	C	185684	T
chrIV	185597	C	185714	T
chrIV	185668	C	185785	T
chrIV	185683	T	185800	C
chrIV	185704	A	185821	G
chrIV	185746	C	185863	T
chrIV	185783	T	185900	C
chrIV	186712	G	186829	A
chrIV	186841	C	186958	T
chrIV	187060	C	187177	T
chrIV	187198	G	187315	T
chrIV	187216	C	187333	T
chrIV	187293	A	187410	G
chrIV	187696	G	187813	T
chrIV	187789	C	187906	T
chrIV	188103	C	188220	G
chrIV	188150	T	188267	C
chrIV	188469	T	188586	C
chrIV	189502	C	189619	T
chrIV	189732	G	189849	A
chrIV	190140	G	190257	A
chrIV	190212	C	190329	A
chrIV	190497	C	190614	T
chrIV	190604	T	190721	G
chrIV	190672	G	190789	A
chrIV	190810	C	190927	T
chrIV	190888	C	191005	G
chrIV	191044	G	191161	C
chrIV	191112	A	191229	G
chrIV	191355	G	191472	A
chrIV	192247	T	192364	C
chrIV	192278	G	192395	C
chrIV	192319	T	192436	C
chrIV	192451	G	192568	A
chrIV	192839	C	192955	T
chrIV	193043	A	193159	G
chrIV	193103	C	193219	T
chrIV	193107	T	193223	C
chrIV	193118	A	193234	G
chrIV	193121	C	193237	T
chrIV	193154	T	193270	C
chrIV	193178	C	193294	T
chrIV	193214	T	193330	A
chrIV	193229	C	193345	T
chrIV	193242	T	193358	C
chrIV	193254	A	193370	G
chrIV	193364	G	193480	A
chrIV	193567	G	193683	A
chrIV	193568	G	193684	A
chrIV	193583	T	193699	C
chrIV	193595	A	193711	G
chrIV	193723	G	193839	A
chrIV	194241	T	194357	C
chrIV	194317	A	194434	G
chrIV	195095	C	195212	T
chrIV	195098	C	195215	T
chrIV	195160	G	195277	A
chrIV	195463	A	195580	G
chrIV	195920	A	196037	G
chrIV	196014	A	196131	G
chrIV	196443	C	196560	T
chrIV	196806	T	196923	C
chrIV	196851	A	196968	G
chrIV	197574	G	197691	A
chrIV	197883	G	198000	C
chrIV	198659	G	198775	A
chrIV	198685	T	198801	C
chrIV	198734	T	198850	C
chrIV	198778	C	198894	T
chrIV	198878	C	198994	T
chrIV	199316	T	199432	C
chrIV	199393	G	199509	A
chrIV	199738	A	199854	G
chrIV	200151	T	200267	C
chrIV	200193	A	200309	G
chrIV	200220	C	200336	T
chrIV	201039	T	201155	C
chrIV	201393	C	201509	T
chrIV	217109	C	217226	T
chrIV	217342	G	217459	A
chrIV	217405	C	217522	T
chrIV	217447	G	217563	A
chrIV	217557	G	217673	A
chrIV	217691	T	217807	C
chrIV	218010	C	218126	T
chrIV	296083	G	296233	A
chrIV	304248	C	304398	T
chrIV	304677	C	304827	T
chrIV	305375	A	305525	G
chrIV	305599	G	305749	T
chrIV	356562	C	356714	T
chrIV	356766	A	356918	G
chrIV	356951	T	357103	G
chrIV	356965	A	357117	G
chrIV	357038	G	357190	C
chrIV	357070	C	357222	T
chrIV	357312	T	357467	C
chrIV	357529	C	357684	T
chrIV	357632	A	357787	C
chrIV	357787	A	357942	G
chrIV	357802	C	357957	T
chrIV	358050	G	358205	A
chrIV	358197	C	358352	T
chrIV	358230	T	358385	A
chrIV	358243	T	358398	C
chrIV	358273	A	358428	G
chrIV	358299	T	358454	C
chrIV	358380	C	358535	A
chrIV	358389	C	358544	T
chrIV	358431	G	358586	A
chrIV	358561	A	358716	T
chrIV	358643	G	358798	T
chrIV	358690	G	358845	T
chrIV	358707	T	358862	G
chrIV	358755	A	358910	G
chrIV	358884	A	359039	C
chrIV	358932	A	359087	G
chrIV	358989	T	359144	A
chrIV	359007	C	359162	T
chrIV	359028	A	359183	G
chrIV	359069	T	359224	C
chrIV	364735	G	364890	A
chrIV	364913	G	365068	T
chrIV	365027	G	365184	A
chrIV	365740	T	365897	C
chrIV	365821	A	365978	G
chrIV	365897	T	366054	A
chrIV	366283	G	366440	A
chrIV	366354	C	366511	A
chrIV	366413	C	366570	T
chrIV	366464	C	366621	T
chrIV	366543	C	366702	T
chrIV	366862	C	367021	T
chrIV	367162	G	367321	A
chrIV	367213	T	367372	C
chrIV	367336	A	367495	G
chrIV	367564	G	367723	C
chrIV	367618	G	367777	A
chrIV	368193	A	368352	C
chrIV	368207	A	368366	G
chrIV	368276	C	368435	T
chrIV	368402	G	368561	A
chrIV	368735	G	368894	A
chrIV	368972	G	369131	A
chrIV	369194	C	369353	T
chrIV	369366	C	369981	A
chrIV	369451	G	370066	A
chrIV	375239	A	375854	G
chrIV	375282	C	375897	T
chrIV	375335	C	375950	T
chrIV	375384	T	376000	A
chrIV	375458	A	376074	G
chrIV	375530	T	376146	C
chrIV	375533	A	376149	C
chrIV	375542	G	376158	T
chrIV	375611	G	376227	A
chrIV	375690	G	376306	C
chrIV	375773	T	376389	C
chrIV	375776	T	376392	C
chrIV	375826	A	376442	T
chrIV	375932	T	376548	G
chrIV	376661	T	377278	A
chrIV	376867	T	377484	C
chrIV	377176	T	377793	C
chrIV	377306	G	377923	A
chrIV	377486	T	378103	G
chrIV	377936	C	378553	T
chrIV	378086	T	378703	C
chrIV	378253	G	378870	T
chrIV	378371	T	378988	C
chrIV	378517	A	379134	T
chrIV	378761	T	379378	G
chrIV	378788	G	379405	A
chrIV	378801	C	379418	T
chrIV	379094	G	379711	A
chrIV	379354	G	379971	A
chrIV	379372	G	379989	A
chrIV	379570	T	380187	C
chrIV	379603	T	380220	A
chrIV	379882	G	380499	A
chrIV	380035	G	380652	A
chrIV	380086	A	380703	G
chrIV	380427	C	381044	T
chrIV	380580	T	381197	C
chrIV	380668	C	381285	T
chrIV	381268	C	381885	T
chrIV	381346	G	381963	A
chrIV	381481	A	382098	G
chrIV	381576	T	382193	C
chrIV	381750	C	382367	T
chrIV	381770	C	382387	T
chrIV	382023	C	382640	T
chrIV	382229	T	382846	C
chrIV	382330	C	382947	T
chrIV	382372	C	382989	T
chrIV	382396	A	383013	G
chrIV	382422	C	383039	T
chrIV	382655	T	383308	C
chrIV	382830	C	383483	T
chrIV	383033	A	383686	G
chrIV	383038	T	383691	G
chrIV	383065	G	383718	A
chrIV	383227	C	383880	T
chrIV	383229	C	383882	T
chrIV	383274	T	383927	A
chrIV	383367	A	384020	G
chrIV	383382	T	384035	C
chrIV	383386	G	384039	A
chrIV	383395	G	384048	A
chrIV	383425	T	384078	A
chrIV	383443	G	384096	A
chrIV	384256	A	384159	G
chrIV	384257	T	384160	C
chrIV	384275	G	384178	A
chrIV	384299	C	384202	A
chrIV	384355	A	384222	G
chrIV	384370	G	384237	A
chrIV	384378	G	384245	A
chrIV	384407	G	384292	C
chrIV	384415	A	384300	G
chrIV	384429	A	384314	C
chrIV	384431	C	384316	A
chrIV	384432	T	384317	C
chrIV	384434	A	384319	T
chrIV	384435	C	384320	T
chrIV	384436	T	384321	A
chrIV	384437	A	384322	C
chrIV	384439	A	384324	T
chrIV	384442	A	384327	G
chrIV	384451	G	384336	A
chrIV	384454	A	384339	T
chrIV	384455	A	384340	G
chrIV	384456	C	384341	T
chrIV	384460	A	384345	T
chrIV	384514	A	384489	G
chrIV	384518	T	384493	G
chrIV	384521	G	384496	A
chrIV	384523	G	384498	A
chrIV	384524	T	384499	A
chrIV	384526	A	384501	G
chrIV	384527	A	384502	G
chrIV	384529	T	384504	C
chrIV	384540	G	384515	A
chrIV	384541	G	384516	A
chrIV	384548	G	384523	A
chrIV	384568	A	384543	G
chrIV	384581	T	384556	G
chrIV	384595	T	384570	G
chrIV	384602	T	384577	G
chrIV	384607	G	384582	A
chrIV	384703	A	384678	G
chrIV	384757	G	384732	A
chrIV	384792	A	384767	C
chrIV	385114	T	384909	C
chrIV	385243	T	385038	C
chrIV	385363	T	385158	G
chrIV	385396	C	385191	G
chrIV	385411	G	385206	A
chrIV	385506	T	385301	C
chrIV	385531	G	385326	A
chrIV	385579	T	385374	C
chrIV	385588	G	385381	A
chrIV	385750	T	385543	C
chrIV	385790	G	385583	A
chrIV	385792	G	385585	A
chrIV	385898	T	385691	A
chrIV	385913	G	385706	A
chrIV	385919	G	385712	A
chrIV	385922	A	385715	T
chrIV	385961	G	385754	A
chrIV	385989	C	385781	G
chrIV	386001	A	385793	G
chrIV	386025	C	385817	T
chrIV	386031	G	385823	T
chrIV	386095	T	385885	C
chrIV	386116	T	385906	G
chrIV	386131	C	385921	T
chrIV	386132	C	385922	G
chrIV	386135	T	385925	C
chrIV	386136	T	385926	C
chrIV	386141	G	385931	A
chrIV	386149	G	385939	A
chrIV	386155	A	385945	C
chrIV	386164	A	385954	G
chrIV	386165	G	385955	A
chrIV	386167	A	385957	G
chrIV	386168	G	385958	A
chrIV	386169	G	385959	A
chrIV	386380	G	386167	C
chrIV	386402	G	386189	A
chrIV	386438	A	386226	C
chrIV	386441	C	386229	G
chrIV	386445	A	386233	G
chrIV	386446	G	386234	A
chrIV	386469	T	386257	A
chrIV	386490	A	386278	G
chrIV	386499	C	386287	T
chrIV	386506	G	386294	A
chrIV	386517	T	386305	A
chrIV	386523	T	386311	C
chrIV	386534	C	386322	T
chrIV	386535	C	386323	T
chrIV	386613	C	386399	T
chrIV	386635	G	386421	C
chrIV	386657	G	386443	A
chrIV	386702	G	386488	C
chrIV	386719	A	386505	T
chrIV	386762	G	386547	A
chrIV	386776	T	386561	C
chrIV	386891	A	386677	G
chrIV	386911	G	386697	T
chrIV	386946	T	386732	A
chrIV	386947	T	386733	A
chrIV	386975	C	386761	G
chrIV	387000	G	386786	A
chrIV	387021	T	386807	C
chrIV	387026	C	386812	A
chrIV	387041	G	386827	A
chrIV	387066	T	386852	C
chrIV	387149	T	386934	C
chrIV	387157	A	386942	G
chrIV	387304	A	387089	T
chrIV	387371	C	387156	T
chrIV	387713	T	387492	C
chrIV	387772	A	387551	G
chrIV	387828	G	387607	A
chrIV	388049	C	387828	G
chrIV	388221	G	388000	T
chrIV	388305	A	388084	G
chrIV	388338	G	388117	T
chrIV	388426	G	388205	C
chrIV	388449	C	388228	T
chrIV	388587	T	388366	C
chrIV	388815	A	388594	G
chrIV	388871	A	388650	G
chrIV	388942	A	388721	T
chrIV	389012	A	388791	T
chrIV	389045	G	388824	A
chrIV	389375	T	389154	G
chrIV	390027	C	389806	A
chrIV	390097	G	389876	A
chrIV	390111	T	389890	C
chrIV	390120	A	389899	T
chrIV	390447	G	390220	A
chrIV	390560	C	390339	T
chrIV	390563	C	390342	T
chrIV	390566	C	390345	T
chrIV	390684	A	390463	T
chrIV	390744	A	390523	G
chrIV	390756	T	390535	A
chrIV	391128	T	390907	C
chrIV	391149	G	390928	C
chrIV	391193	T	390972	C
chrIV	391561	C	391340	T
chrIV	391712	T	391491	C
chrIV	392799	C	392572	T
chrIV	392938	C	392711	A
chrIV	395767	A	395540	T
chrIV	396458	A	396231	G
chrIV	396610	C	396383	A
chrIV	396700	A	396473	G
chrIV	397411	A	397184	G
chrIV	398408	C	398181	G
chrIV	398523	T	398296	G
chrIV	398799	T	398572	C
chrIV	399193	A	398966	G
chrIV	399202	C	398975	T
chrIV	399570	A	399343	G
chrIV	400197	A	399970	G
chrIV	400242	A	400015	T
chrIV	400290	C	400063	T
chrIV	400395	G	400168	A
chrIV	400404	G	400177	C
chrIV	400491	T	400264	C
chrIV	400709	T	400482	A
chrIV	401117	A	400890	G
chrIV	401696	G	401469	A
chrIV	401726	A	401499	G
chrIV	402050	T	401823	C
chrIV	402371	A	402144	G
chrIV	402402	T	402175	G
chrIV	402856	C	402629	A
chrIV	403331	A	403104	G
chrIV	403346	A	403119	G
chrIV	403347	A	403120	G
chrIV	403449	T	403222	C
chrIV	403476	A	403249	G
chrIV	403543	T	403316	A
chrIV	403544	G	403317	A
chrIV	403580	A	403353	G
chrIV	403679	A	403452	G
chrIV	403830	A	403603	G
chrIV	403952	T	403725	C
chrIV	404304	C	404077	T
chrIV	404459	A	404232	T
chrIV	404690	A	404463	G
chrIV	404702	T	404475	C
chrIV	404730	A	404503	C
chrIV	404818	G	404591	A
chrIV	404941	A	404714	G
chrIV	404996	T	404769	C
chrIV	405116	C	404889	A
chrIV	405143	A	404916	G
chrIV	405482	A	405254	G
chrIV	405794	A	405566	G
chrIV	405797	C	405569	T
chrIV	405938	A	405710	G
chrIV	406099	C	405871	T
chrIV	406118	C	405890	T
chrIV	406151	C	405923	T
chrIV	406262	T	406034	C
chrIV	406301	A	406073	G
chrIV	406385	C	406157	T
chrIV	406667	T	406439	C
chrIV	406814	T	406586	C
chrIV	406901	A	406673	T
chrIV	407050	A	406822	G
chrIV	407223	G	406995	C
chrIV	407286	C	407058	G
chrIV	408038	C	407808	T
chrIV	408065	T	407835	C
chrIV	408095	T	407865	A
chrIV	408128	T	407898	A
chrIV	408131	C	407901	T
chrIV	408221	A	407990	G
chrIV	408374	C	408143	T
chrIV	408416	T	408185	A
chrIV	408706	T	408475	C
chrIV	408757	A	408526	G
chrIV	408811	A	408580	T
chrIV	408812	G	408581	A
chrIV	408877	G	408646	A
chrIV	408894	T	408663	G
chrIV	410728	C	410497	T
chrIV	411048	C	410815	T
chrIV	411189	G	410956	C
chrIV	411448	G	411216	T
chrIV	411544	T	411313	C
chrIV	411666	T	411435	C
chrIV	412382	C	412149	T
chrIV	412388	C	412155	T
chrIV	422542	A	422309	G
chrIV	435518	A	435285	T
chrIV	435680	T	435448	C
chrIV	435820	A	435588	G
chrIV	435908	G	435676	A
chrIV	435990	A	435754	G
chrIV	435991	T	435755	G
chrIV	436011	G	435775	A
chrIV	436026	T	435790	C
chrIV	436162	A	435925	C
chrIV	436177	C	435940	T
chrIV	436257	G	436023	A
chrIV	436270	G	436036	C
chrIV	436307	C	436073	A
chrIV	436308	G	436074	T
chrIV	436309	A	436075	G
chrIV	436314	A	436078	G
chrIV	436482	T	436246	A
chrIV	436543	C	436307	T
chrIV	436565	T	436329	C
chrIV	436884	C	436648	T
chrIV	436994	T	436758	C
chrIV	437035	C	436799	A
chrIV	437054	G	436818	T
chrIV	437065	A	436829	T
chrIV	437081	T	436845	C
chrIV	437130	A	436894	G
chrIV	456463	G	455852	A
chrIV	462088	G	461477	T
chrIV	531628	A	534903	G
chrIV	538279	C	541554	T
chrIV	538282	G	541557	A
chrIV	538285	A	541560	G
chrIV	538294	A	541569	G
chrIV	538297	G	541572	A
chrIV	538318	A	541593	T
chrIV	538326	T	541601	C
chrIV	538332	A	541607	G
chrIV	538337	T	541612	C
chrIV	538341	C	541616	G
chrIV	538343	A	541618	G
chrIV	538354	G	541629	A
chrIV	538357	C	541632	A
chrIV	538359	A	541634	G
chrIV	538369	T	541644	C
chrIV	538384	G	541659	A
chrIV	538404	C	541679	T
chrIV	572235	T	576024	C
chrIV	637663	A	641483	T
chrIV	638634	G	642454	A
chrIV	638815	C	642635	T
chrIV	641150	C	644970	T
chrIV	642192	A	646012	C
chrIV	644629	T	648449	A
chrIV	645268	C	649088	G
chrIV	645352	C	649172	T
chrIV	652308	C	650204	A
chrIV	652808	T	650704	C
chrIV	653246	T	651536	C
chrIV	653336	C	651626	T
chrIV	654943	T	653233	C
chrIV	657366	G	655656	A
chrIV	660979	A	659269	G
chrIV	662378	T	660668	C
chrIV	662835	T	661125	C
chrIV	664444	T	662734	A
chrIV	664509	A	662799	T
chrIV	666471	C	664761	T
chrIV	667309	G	665599	A
chrIV	667469	A	665759	T
chrIV	672865	A	677076	G
chrIV	673495	G	677706	A
chrIV	674519	A	678730	G
chrIV	820043	G	823128	A
chrIV	833668	T	836753	G
chrIV	880697	A	883783	G
chrIV	975772	G	979463	A
chrIV	987244	G	990935	A
chrIV	1047299	G	1050988	C
chrIV	1160352	C	1170308	T
chrIV	1160444	C	1170400	T
chrIV	1229783	G	1234206	C
chrIV	1253397	T	1257862	C
chrIV	1282718	A	1287183	G
chrIV	1300640	C	1305105	T
chrIV	1307967	T	1312431	C
chrIV	1341094	A	1345390	G
chrIV	1402305	C	1406648	T
chrIV	1433710	A	1438054	T
chrIV	1503947	G	1508272	A
chrIV	1525313	T	1539149	G
chrIV	1525335	C	1539171	G
chrIV	1525340	C	1539176	A
chrIV	1525345	C	1539181	G
chrIV	1525351	C	1539187	G
chrIV	1525357	C	1539193	G
chrIV	1525363	C	1539199	G
chrIV	1525366	C	1539202	G
chrIV	1525368	C	1539204	G
chrIV	1525370	C	1539206	G
chrIV	1525394	G	1539228	T
chrIV	1525468	A	1539305	G
chrIV	1525470	A	1539307	G
chrIV	1525471	T	1539308	G
chrIV	1525472	A	1539309	G
chrIV	1525474	A	1539311	G
chrV	48384	T	48747	C
chrV	116867	G	117869	A
chrV	154531	T	155534	A
chrV	174633	G	175636	A
chrV	175674	T	176677	C
chrV	175840	T	176807	C
chrV	177250	C	178217	G
chrV	178044	A	179011	G
chrV	178287	T	179254	C
chrV	180421	C	181388	T
chrV	180460	C	181427	T
chrV	180517	C	181484	T
chrV	180547	T	181514	C
chrV	181705	T	182672	C
chrV	183957	A	184924	G
chrV	194375	A	195342	G
chrV	194625	T	195592	A
chrV	194646	T	195613	G
chrV	194739	C	195704	T
chrV	194773	C	195738	T
chrV	195341	G	196306	A
chrV	195356	T	196321	C
chrV	195368	C	196333	G
chrV	195440	A	196405	G
chrV	195460	C	196425	T
chrV	195529	A	196494	G
chrV	195746	A	196711	G
chrV	195765	A	196730	G
chrV	195830	T	196795	G
chrV	195872	G	196837	C
chrV	195875	T	196840	C
chrV	195975	T	196940	C
chrV	196106	T	197071	C
chrV	196110	A	197075	G
chrV	196190	A	197155	G
chrV	196271	C	197236	T
chrV	196352	T	197317	C
chrV	196355	T	197320	C
chrV	196385	A	197350	G
chrV	196391	G	197356	A
chrV	196478	T	197443	C
chrV	196526	C	197491	T
chrV	196554	T	197519	C
chrV	196666	A	197630	T
chrV	196708	G	197672	A
chrV	196832	C	197796	T
chrV	196983	T	197947	C
chrV	196986	C	197950	T
chrV	197103	T	198067	C
chrV	197145	G	198109	A
chrV	197322	A	198286	G
chrV	197352	T	198316	C
chrV	197361	G	198325	A
chrV	197415	A	198379	G
chrV	197493	G	198457	A
chrV	197502	C	198466	T
chrV	197916	C	198880	A
chrV	198126	G	199090	A
chrV	198538	T	199502	C
chrV	198629	A	199587	G
chrV	198669	G	199627	T
chrV	198671	G	199629	A
chrV	198680	G	199638	A
chrV	198865	A	199824	G
chrV	198962	G	199921	A
chrV	199099	C	200058	T
chrV	199227	A	200186	T
chrV	199270	A	200229	G
chrV	199337	G	200296	A
chrV	200053	T	201012	C
chrV	200070	C	201029	T
chrV	200245	G	201204	A
chrV	200268	T	201227	C
chrV	200354	A	201313	C
[truncated: 7,451 more rows]

## Sheet: variant_type
Chromosome	Position in S288C	Reference Base	Variant Base	Variant Type	Systematic Name
chrI	19971	C	T	silent_mutation
chrI	25340	C	A	conservative_missense_codon	YAL063C
chrI	25506	C	T	synonymous_codon	YAL063C
chrI	25512	T	C	synonymous_codon	YAL063C
chrI	25519	G	A	conservative_missense_codon	YAL063C
chrI	25521	A	G	conservative_missense_codon	YAL063C
chrI	25523	C	T	conservative_missense_codon	YAL063C
chrI	25524	C	G	conservative_missense_codon	YAL063C
chrI	25525	A	G	conservative_missense_codon	YAL063C
chrI	25526	A	T	conservative_missense_codon	YAL063C
chrI	25527	A	G	conservative_missense_codon	YAL063C
chrI	25529	C	T	conservative_missense_codon	YAL063C
chrI	25530	T	A	non_conservative_missense_codon	YAL063C
chrI	25531	T	G	non_conservative_missense_codon	YAL063C
chrI	25534	C	G	conservative_missense_codon	YAL063C
chrI	25536	G	T	synonymous_codon	YAL063C
chrI	141030	T	A	conservative_missense_codon	YAL004W
chrI	141030	T	A	synonymous_codon	YAL005C
chrI	141135	A	T	non_conservative_missense_codon	YAL004W
chrI	141135	A	T	synonymous_codon	YAL005C
chrI	152348	G	A	conservative_missense_codon	YAR002W
chrI	163774	C	G	conservative_missense_codon	YAR009C
chrI	181746	C	T	silent_mutation
chrI	181772	T	C	silent_mutation
chrI	182040	C	T	silent_mutation
chrI	182045	A	G	silent_mutation
chrI	195585	C	T	synonymous_codon	YAR042W
chrI	195677	A	G	conservative_missense_codon	YAR042W
chrI	196779	G	A	silent_mutation
chrI	196858	C	T	silent_mutation
chrI	196884	C	T	silent_mutation
chrI	196891	G	T	silent_mutation
chrI	196899	C	T	silent_mutation
chrI	196901	A	C	silent_mutation
chrI	196924	T	C	silent_mutation
chrI	197024	A	G	silent_mutation
chrI	197032	C	T	silent_mutation
chrI	197120	G	A	silent_mutation
chrI	197123	G	A	silent_mutation
chrI	197216	A	G	silent_mutation
chrI	197236	G	T	silent_mutation
chrI	197242	T	G	silent_mutation
chrI	197243	C	T	silent_mutation
chrI	197277	T	C	silent_mutation
chrI	197344	C	T	silent_mutation
chrI	197350	G	A	silent_mutation
chrI	197428	A	T	silent_mutation
chrI	197459	T	C	silent_mutation
chrI	197476	T	C	silent_mutation
chrI	197484	T	C	silent_mutation
chrI	197497	G	A	silent_mutation
chrI	197560	A	G	silent_mutation
chrI	197587	G	A	silent_mutation
chrI	197646	T	G	silent_mutation
chrI	197656	A	G	silent_mutation
chrI	197694	G	T	silent_mutation
chrI	197695	A	G	silent_mutation
chrI	197758	A	G	silent_mutation
chrI	197760	G	C	silent_mutation
chrI	197765	C	G	silent_mutation
chrI	197770	A	G	silent_mutation
chrI	197772	A	G	silent_mutation
chrI	197783	G	A	silent_mutation
chrI	197791	A	G	silent_mutation
chrI	197811	G	A	silent_mutation
chrI	197819	A	G	silent_mutation
chrI	197825	G	A	silent_mutation
chrI	197873	G	A	silent_mutation
chrI	197908	C	T	silent_mutation
chrI	197921	C	A	silent_mutation
chrI	197983	T	A	silent_mutation
chrI	198013	T	A	silent_mutation
chrI	198022	A	G	silent_mutation
chrI	198027	C	T	silent_mutation
chrI	198118	G	A	silent_mutation
chrI	198168	G	T	silent_mutation
chrI	198190	T	C	silent_mutation
chrI	198215	C	A	silent_mutation
chrI	198232	C	G	silent_mutation
chrI	198244	G	T	silent_mutation
chrI	198252	C	G	silent_mutation
chrI	198253	T	C	silent_mutation
chrI	198259	T	C	silent_mutation
chrI	198267	A	G	silent_mutation
chrI	198279	A	G	silent_mutation
chrI	198287	A	G	silent_mutation
chrI	198291	G	A	silent_mutation
chrI	198307	A	G	silent_mutation
chrI	198331	G	T	silent_mutation
chrI	198347	G	T	silent_mutation
chrI	198351	G	A	silent_mutation
chrI	198418	A	C	silent_mutation
chrI	198456	T	A	silent_mutation
chrI	198468	C	G	silent_mutation
chrI	198482	G	A	silent_mutation
chrI	198533	C	T	silent_mutation
chrI	198536	C	T	silent_mutation
chrI	198548	C	A	silent_mutation
chrI	198557	C	T	silent_mutation
chrI	198560	T	C	silent_mutation
chrI	198562	G	A	silent_mutation
chrI	198582	G	A	silent_mutation
chrI	198586	A	G	silent_mutation
chrI	198589	A	G	silent_mutation
chrI	198601	T	A	silent_mutation
chrI	198603	T	G	silent_mutation
chrI	198604	C	T	silent_mutation
chrI	198619	C	T	silent_mutation
chrI	198620	T	G	silent_mutation
chrI	198623	A	T	silent_mutation
chrI	198627	A	G	silent_mutation
chrI	198628	C	G	silent_mutation
chrI	198631	C	T	silent_mutation
chrI	198632	T	G	silent_mutation
chrI	198635	G	A	silent_mutation
chrI	198636	G	A	silent_mutation
chrI	198642	T	C	silent_mutation
chrI	198648	C	T	silent_mutation
chrI	198652	A	G	silent_mutation
chrI	198657	C	T	silent_mutation
chrI	198664	A	G	silent_mutation
chrII	6440	G	C	silent_mutation
chrII	7510	G	A	silent_mutation
chrII	7511	G	A	silent_mutation
chrII	15101	T	G	conservative_missense_codon	YBL105C
chrII	15510	G	T	synonymous_codon	YBL105C
chrII	15518	A	G	synonymous_codon	YBL105C
chrII	16380	C	T	synonymous_codon	YBL105C
chrII	16392	A	G	synonymous_codon	YBL105C
chrII	30012	C	T	synonymous_codon	YBL100W-A
chrII	30050	A	G	conservative_missense_codon	YBL100W-A,YBL100W-B
chrII	30210	T	C	synonymous_codon	YBL100W-A
chrII	30658	G	T	conservative_missense_codon	YBL100W-A,YBL100W-B
chrII	30660	T	C	conservative_missense_codon	YBL100W-A,YBL100W-B
chrII	30723	G	A	synonymous_codon	YBL100W-A
chrII	30754	G	A	conservative_missense_codon	YBL100W-A,YBL100W-B
chrII	30848	C	G	conservative_missense_codon	YBL100W-A,YBL100W-B
chrII	31140	T	C	synonymous_codon	YBL100W-A
chrII	31260	A	G	conservative_missense_codon	YBL100W-B
chrII	31525	T	C	synonymous_codon	YBL100W-B
chrII	34298	G	A	conservative_missense_codon	YBL100W-B
chrII	35485	C	T	silent_mutation
chrII	59755	T	C	silent_mutation
chrII	137683	A	G	silent_mutation
chrII	150036	T	A	stop_gained	YBL037W
chrII	155739	T	G	conservative_missense_codon	YBL034C
chrII	155783	A	G	synonymous_codon	YBL034C
chrII	156017	C	T	synonymous_codon	YBL034C
chrII	156194	C	T	synonymous_codon	YBL034C
chrII	156203	C	A	synonymous_codon	YBL034C
chrII	156652	C	T	conservative_missense_codon	YBL034C
chrII	156776	A	G	synonymous_codon	YBL034C
chrII	157617	T	C	conservative_missense_codon	YBL034C
chrII	158200	C	T	conservative_missense_codon	YBL034C
chrII	158707	G	A	synonymous_codon	YBL033C
chrII	158800	G	T	synonymous_codon	YBL033C
chrII	158803	A	G	synonymous_codon	YBL033C
chrII	158986	C	T	synonymous_codon	YBL033C
chrII	159067	G	A	synonymous_codon	YBL033C
chrII	159079	C	T	synonymous_codon	YBL033C
chrII	159139	T	G	synonymous_codon	YBL033C
chrII	159226	G	A	synonymous_codon	YBL033C
chrII	159397	T	C	synonymous_codon	YBL033C
chrII	159412	G	A	synonymous_codon	YBL033C
chrII	159427	A	G	synonymous_codon	YBL033C
chrII	159926	C	A	silent_mutation
chrII	159931	T	G	silent_mutation
chrII	159953	C	T	silent_mutation
chrII	159957	A	G	silent_mutation
chrII	160020	C	T	silent_mutation
chrII	160143	T	G	silent_mutation
chrII	160403	G	T	conservative_missense_codon	YBL032W
chrII	160509	A	G	conservative_missense_codon	YBL032W
chrII	160618	C	T	synonymous_codon	YBL032W
chrII	160810	T	G	synonymous_codon	YBL032W
chrII	161463	T	C	silent_mutation
chrII	161484	T	G	silent_mutation
chrII	161687	T	C	silent_mutation
chrII	161757	G	A	conservative_missense_codon	YBL031W
chrII	161840	T	C	synonymous_codon	YBL031W
chrII	162251	A	G	conservative_missense_codon	YBL031W
chrII	162271	A	G	synonymous_codon	YBL031W
chrII	162420	T	C	conservative_missense_codon	YBL031W
chrII	162680	A	G	conservative_missense_codon	YBL031W
chrII	162773	T	C	silent_mutation
chrII	163121	A	G	synonymous_codon	YBL030C
chrII	163854	T	C	synonymous_codon	YBL030C
chrII	163967	A	G	synonymous_codon	YBL030C
chrII	163989	G	A	synonymous_codon	YBL030C
chrII	164419	T	C	silent_mutation
chrII	164474	A	G	silent_mutation
chrII	164851	T	A	silent_mutation
chrII	164975	T	C	silent_mutation
chrII	164995	T	G	silent_mutation
chrII	165049	C	T	silent_mutation
chrII	165178	C	G	silent_mutation
chrII	165525	G	A	silent_mutation
chrII	165586	T	A	silent_mutation
chrII	165680	A	C	silent_mutation
chrII	165729	T	C	silent_mutation
chrII	165877	T	C	silent_mutation
chrII	166019	T	C	silent_mutation
chrII	166311	C	T	synonymous_codon	YBL029W
chrII	166396	A	T	non_conservative_missense_codon	YBL029W
chrII	166460	C	T	synonymous_codon	YBL029W
chrII	166550	G	A	synonymous_codon	YBL029W
chrII	166572	C	T	conservative_missense_codon	YBL029W
chrII	166607	T	C	synonymous_codon	YBL029W
chrII	166703	G	A	synonymous_codon	YBL029W
chrII	167174	A	G	synonymous_codon	YBL029W
chrII	167373	C	T	silent_mutation
chrII	167426	G	A	silent_mutation
chrII	167527	G	A	synonymous_codon	YBL028C
chrII	167650	C	T	synonymous_codon	YBL028C
chrII	167794	A	G	synonymous_codon	YBL028C
chrII	167821	A	T	synonymous_codon	YBL028C
chrII	167924	A	T	silent_mutation
chrII	167998	G	A	silent_mutation
chrII	168065	T	C	silent_mutation
chrII	168150	C	G	silent_mutation
chrII	168194	G	A	silent_mutation
chrII	168448	T	C	silent_mutation
chrII	168467	T	G	silent_mutation
chrII	169483	A	G	silent_mutation
chrII	169496	G	C	silent_mutation
chrII	169621	C	T	silent_mutation
chrII	169818	C	G	silent_mutation
chrII	169820	G	T	silent_mutation
chrII	169893	T	C	silent_mutation
chrII	169999	T	G	silent_mutation
chrII	170152	T	C	silent_mutation
chrII	170167	C	G	silent_mutation
chrII	170179	T	C	silent_mutation
chrII	170206	G	T	silent_mutation
chrII	170442	T	C	silent_mutation
chrII	170593	A	G	silent_mutation
chrII	170676	G	A	synonymous_codon	YBL026W
chrII	170790	T	C	silent_mutation
chrII	170868	C	T	synonymous_codon	YBL026W
chrII	171433	A	G	silent_mutation
chrII	171495	A	T	synonymous_codon	YBL025W
chrII	171570	A	G	synonymous_codon	YBL025W
chrII	171612	G	C	conservative_missense_codon	YBL025W
chrII	171924	G	A	silent_mutation
chrII	172113	T	C	silent_mutation
chrII	172171	C	T	silent_mutation
chrII	172178	C	A	silent_mutation
chrII	172223	A	G	silent_mutation
chrII	172245	C	T	silent_mutation
chrII	172262	A	G	silent_mutation
chrII	172302	A	G	silent_mutation
chrII	172307	T	C	silent_mutation
chrII	172322	G	T	silent_mutation
chrII	172323	T	A	silent_mutation
chrII	172338	T	G	silent_mutation
chrII	172488	A	G	silent_mutation
chrII	172681	G	A	conservative_missense_codon	YBL024W
chrII	173028	T	C	synonymous_codon	YBL024W
chrII	173043	A	G	synonymous_codon	YBL024W
chrII	173659	T	C	conservative_missense_codon	YBL024W
chrII	174535	C	T	conservative_missense_codon	YBL024W
chrII	175160	T	A	synonymous_codon	YBL023C
chrII	175505	C	A	synonymous_codon	YBL023C
chrII	175526	A	G	synonymous_codon	YBL023C
chrII	175964	T	C	synonymous_codon	YBL023C
chrII	176084	T	C	synonymous_codon	YBL023C
chrII	176261	T	C	synonymous_codon	YBL023C
chrII	176546	T	C	synonymous_codon	YBL023C
chrII	176636	G	A	synonymous_codon	YBL023C
chrII	177287	C	G	conservative_missense_codon	YBL023C
chrII	177793	G	A	silent_mutation
chrII	178099	A	G	synonymous_codon	YBL022C
chrII	178447	A	G	synonymous_codon	YBL022C
chrII	178930	C	T	synonymous_codon	YBL022C
chrII	179110	G	A	synonymous_codon	YBL022C
chrII	179146	G	A	synonymous_codon	YBL022C
chrII	179233	T	C	synonymous_codon	YBL022C
chrII	179248	A	G	synonymous_codon	YBL022C
chrII	179257	C	T	synonymous_codon	YBL022C
chrII	179266	A	G	synonymous_codon	YBL022C
chrII	180070	T	G	synonymous_codon	YBL022C
chrII	180168	A	G	synonymous_codon	YBL022C
chrII	180244	T	C	synonymous_codon	YBL022C
chrII	180298	C	T	synonymous_codon	YBL022C
chrII	180312	C	T	conservative_missense_codon	YBL022C
chrII	180372	T	A	conservative_missense_codon	YBL022C
chrII	180379	A	G	synonymous_codon	YBL022C
chrII	180607	G	A	synonymous_codon	YBL022C
chrII	181279	C	T	silent_mutation
chrII	181302	A	G	silent_mutation
chrII	181425	A	C	silent_mutation
chrII	181705	C	G	synonymous_codon	YBL021C
chrII	182128	T	C	silent_mutation
chrII	182360	T	C	silent_mutation
chrII	182436	T	C	synonymous_codon	YBL020W
chrII	182643	C	T	synonymous_codon	YBL020W
chrII	182700	T	C	synonymous_codon	YBL020W
chrII	182892	G	A	synonymous_codon	YBL020W
chrII	182901	C	T	synonymous_codon	YBL020W
chrII	183084	A	C	synonymous_codon	YBL020W
chrII	184236	G	C	silent_mutation
chrII	184932	A	C	conservative_missense_codon	YBL019W
chrII	184941	T	A	conservative_missense_codon	YBL019W
chrII	185478	C	G	conservative_missense_codon	YBL019W
chrII	185922	A	G	silent_mutation
chrII	186753	G	A	silent_mutation
chrII	187142	C	T	conservative_missense_codon	YBL017C
chrII	187153	G	A	synonymous_codon	YBL017C
chrII	187552	T	A	synonymous_codon	YBL017C
chrII	187714	C	T	synonymous_codon	YBL017C
chrII	187744	T	C	synonymous_codon	YBL017C
chrII	187873	T	C	synonymous_codon	YBL017C
chrII	187957	G	A	synonymous_codon	YBL017C
chrII	188032	G	A	synonymous_codon	YBL017C
chrII	189113	C	A	conservative_missense_codon	YBL017C
chrII	189209	T	A	conservative_missense_codon	YBL017C
chrII	189223	C	T	synonymous_codon	YBL017C
chrII	189661	T	C	synonymous_codon	YBL017C
chrII	189673	A	G	synonymous_codon	YBL017C
chrII	190032	T	C	conservative_missense_codon	YBL017C
chrII	190128	T	A	conservative_missense_codon	YBL017C
chrII	190246	C	T	synonymous_codon	YBL017C
chrII	190452	A	G	conservative_missense_codon	YBL017C
chrII	190583	G	A	conservative_missense_codon	YBL017C
chrII	190620	C	G	conservative_missense_codon	YBL017C
chrII	190641	A	G	synonymous_codon	YBL017C
chrII	190670	T	C	conservative_missense_codon	YBL017C
chrII	190881	G	A	conservative_missense_codon	YBL017C
chrII	191207	T	C	conservative_missense_codon	YBL017C
chrII	191232	A	G	conservative_missense_codon	YBL017C
chrII	191242	C	A	synonymous_codon	YBL017C
chrII	191470	A	T	conservative_missense_codon	YBL017C
chrII	191528	G	A	conservative_missense_codon	YBL017C
chrII	191563	G	T	synonymous_codon	YBL017C
chrII	191613	G	A	silent_mutation
chrII	192289	G	C	silent_mutation
chrII	192398	T	A	silent_mutation
chrII	192399	A	G	silent_mutation
chrII	192441	G	A	silent_mutation
chrII	192576	A	G	synonymous_codon	YBL016W
chrII	193122	T	C	synonymous_codon	YBL016W
chrII	193664	T	C	silent_mutation
chrII	194226	C	T	synonymous_codon	YBL015W
chrII	209404	T	C	silent_mutation
chrII	222303	C	G	non_conservative_missense_codon	YBL005W-A,YBL005W-B
chrII	222304	G	C	non_conservative_missense_codon	YBL005W-A,YBL005W-B
chrII	225536	A	G	synonymous_codon	YBL005W-B
chrII	252572	T	G	synonymous_codon	YBR008C
chrII	252578	C	T	synonymous_codon	YBR008C
chrII	252589	T	C	conservative_missense_codon	YBR008C
chrII	252599	T	C	synonymous_codon	YBR008C
chrII	252680	A	G	synonymous_codon	YBR008C
chrII	252704	G	T	conservative_missense_codon	YBR008C
chrII	252792	T	G	conservative_missense_codon	YBR008C
chrII	253095	C	T	conservative_missense_codon	YBR008C
chrII	253219	G	A	conservative_missense_codon	YBR008C
chrII	253709	G	A	synonymous_codon	YBR008C
chrII	254030	C	T	synonymous_codon	YBR008C
chrII	254124	T	C	conservative_missense_codon	YBR008C
chrII	254349	C	T	silent_mutation
chrII	254368	C	T	silent_mutation
chrII	254409	C	T	silent_mutation
chrII	254436	T	C	silent_mutation
chrII	254834	A	G	silent_mutation
chrII	254899	T	A	silent_mutation
chrII	255058	A	G	silent_mutation
chrII	255127	A	G	silent_mutation
chrII	255469	G	A	synonymous_codon	YBR009C
chrII	255688	T	A	silent_mutation
chrII	255740	G	A	silent_mutation
chrII	255743	C	T	silent_mutation
chrII	255828	T	C	silent_mutation
chrII	256267	C	A	silent_mutation
chrII	256925	T	C	silent_mutation
chrII	256941	A	T	silent_mutation
chrII	257176	G	A	conservative_missense_codon	YBR011C
chrII	257430	C	T	synonymous_codon	YBR011C
chrII	257565	T	C	synonymous_codon	YBR011C
chrII	257913	T	C	synonymous_codon	YBR011C
chrII	258153	T	C	silent_mutation
chrII	258208	A	C	silent_mutation
chrII	258211	A	G	silent_mutation
chrII	258313	G	C	silent_mutation
chrII	258409	C	A	silent_mutation
chrII	258653	C	T	silent_mutation
chrII	258667	A	G	silent_mutation
chrII	258757	T	C	silent_mutation
chrII	258758	T	C	silent_mutation
chrII	258767	A	T	silent_mutation
chrII	258778	C	T	silent_mutation
chrII	258785	A	G	silent_mutation
chrII	258790	G	T	silent_mutation
chrII	258791	A	G	silent_mutation
chrII	258792	T	C	silent_mutation
chrII	258794	G	A	silent_mutation
chrII	258797	A	C	silent_mutation
chrII	258802	T	C	silent_mutation
chrII	258815	G	A	silent_mutation
chrII	258824	T	A	silent_mutation
chrII	258827	C	A	silent_mutation
chrII	258839	G	A	silent_mutation
chrII	258840	T	A	silent_mutation
chrII	258841	C	T	silent_mutation
chrII	258843	C	T	silent_mutation
chrII	266324	T	C	silent_mutation
chrII	266331	A	G	silent_mutation
chrII	266339	T	A	silent_mutation
chrII	266351	C	G	silent_mutation
chrII	266358	C	G	silent_mutation
chrII	266478	G	A	silent_mutation
chrII	266551	C	G	silent_mutation
chrII	266590	C	T	silent_mutation
chrII	266718	A	G	silent_mutation
chrII	266773	G	A	synonymous_codon	YBR014C
chrII	266791	G	A	synonymous_codon	YBR014C
chrII	267105	T	C	conservative_missense_codon	YBR014C
chrII	267339	C	T	silent_mutation
chrII	267510	C	T	silent_mutation
chrII	267673	T	C	silent_mutation
chrII	268100	G	A	synonymous_codon	YBR015C
chrII	268319	A	G	synonymous_codon	YBR015C
chrII	268644	G	T	conservative_missense_codon	YBR015C
chrII	268844	C	G	synonymous_codon	YBR015C
chrII	268895	G	A	synonymous_codon	YBR015C
chrII	268913	G	A	synonymous_codon	YBR015C
chrII	268925	C	T	synonymous_codon	YBR015C
chrII	268930	A	G	synonymous_codon	YBR015C
chrII	268949	T	C	synonymous_codon	YBR015C
chrII	269066	A	G	synonymous_codon	YBR015C
chrII	269255	G	A	synonymous_codon	YBR015C
chrII	269653	C	T	silent_mutation
chrII	269986	G	A	silent_mutation
chrII	270169	C	T	silent_mutation
chrII	270245	C	A	silent_mutation
chrII	270315	G	T	synonymous_codon	YBR016W
chrII	271427	C	T	synonymous_codon	YBR017C
chrII	271526	C	T	synonymous_codon	YBR017C
chrII	297970	A	T	silent_mutation
chrII	298141	C	T	silent_mutation
chrII	298721	G	A	conservative_missense_codon	YBR030W
chrII	298966	T	C	synonymous_codon	YBR030W
chrII	298990	G	A	synonymous_codon	YBR030W
chrII	299034	A	G	conservative_missense_codon	YBR030W
chrII	299174	T	C	conservative_missense_codon	YBR030W
chrII	299196	T	C	conservative_missense_codon	YBR030W
chrII	299389	A	G	synonymous_codon	YBR030W
chrII	299524	C	T	synonymous_codon	YBR030W
chrII	299680	T	G	synonymous_codon	YBR030W
chrII	299708	G	A	conservative_missense_codon	YBR030W
chrII	299759	C	T	synonymous_codon	YBR030W
chrII	299803	C	A	conservative_missense_codon	YBR030W
chrII	300111	G	A	silent_mutation
chrII	300849	C	T	synonymous_codon	YBR031W
chrII	301002	T	C	synonymous_codon	YBR031W
chrII	301044	C	T	synonymous_codon	YBR031W
chrII	364671	C	T	silent_mutation
chrII	389429	C	G	silent_mutation
chrII	389430	G	C	silent_mutation
chrII	432798	G	A	conservative_missense_codon	YBR094W
chrII	493379	C	T	conservative_missense_codon	YBR128C
chrII	513345	C	T	non_conservative_missense_codon	YBR137W
chrII	555360	T	G	silent_mutation
chrII	559867	G	T	silent_mutation
chrII	621166	T	A	conservative_missense_codon	YBR200W
chrII	621285	G	A	synonymous_codon	YBR200W
chrII	621546	C	T	synonymous_codon	YBR200W
chrII	621963	C	T	synonymous_codon	YBR200W
chrII	622305	T	A	synonymous_codon	YBR200W
chrII	622655	G	A	silent_mutation
chrII	622789	G	T	silent_mutation
chrII	622849	A	T	silent_mutation
chrII	622888	C	A	silent_mutation
chrII	622971	T	C	silent_mutation
chrII	622981	A	C	silent_mutation
chrII	623027	T	C	synonymous_codon	YBR200W-A
chrII	623272	C	A	silent_mutation
chrII	623278	T	C	silent_mutation
chrII	623413	A	T	silent_mutation
chrII	623418	A	T	silent_mutation
chrII	623427	A	G	silent_mutation
chrII	623785	C	T	synonymous_codon	YBR201W
chrII	623818	A	G	synonymous_codon	YBR201W
chrII	623968	G	T	synonymous_codon	YBR201W
chrII	624009	C	T	conservative_missense_codon	YBR201W
chrII	624052	A	T	synonymous_codon	YBR201W
chrII	624076	T	C	synonymous_codon	YBR201W
chrII	624215	A	G	silent_mutation
chrII	624493	C	T	synonymous_codon	YBR201C-A
chrII	624540	A	T	non_conservative_missense_codon	YBR201C-A
chrII	624736	C	T	silent_mutation
chrII	624740	A	G	silent_mutation
chrII	624762	T	C	silent_mutation
chrII	624798	A	G	silent_mutation
chrII	624805	G	A	silent_mutation
chrII	624836	C	A	silent_mutation
chrII	625077	T	C	silent_mutation
chrII	625150	C	G	silent_mutation
chrII	625203	C	A	silent_mutation
chrII	625210	G	A	silent_mutation
chrII	625234	T	G	silent_mutation
chrII	625298	A	G	silent_mutation
chrII	625597	G	A	silent_mutation
chrII	625628	A	C	silent_mutation
chrII	625690	C	A	silent_mutation
chrII	625721	C	T	silent_mutation
chrII	625733	G	C	silent_mutation
chrII	625761	T	C	silent_mutation
chrII	625843	T	C	synonymous_codon	YBR202W
chrII	625876	T	C	synonymous_codon	YBR202W
chrII	626092	A	G	synonymous_codon	YBR202W
chrII	626278	C	T	synonymous_codon	YBR202W
chrII	626455	G	A	synonymous_codon	YBR202W
chrII	626470	C	T	synonymous_codon	YBR202W
chrII	626608	T	C	synonymous_codon	YBR202W
chrII	626629	C	A	synonymous_codon	YBR202W
chrII	626656	G	A	synonymous_codon	YBR202W
chrII	626680	A	T	synonymous_codon	YBR202W
chrII	627001	T	A	synonymous_codon	YBR202W
chrII	627055	A	T	synonymous_codon	YBR202W
chrII	628267	T	C	synonymous_codon	YBR202W
chrII	628269	T	C	conservative_missense_codon	YBR202W
chrII	628345	T	C	silent_mutation
chrII	628674	T	C	silent_mutation
chrII	628807	T	C	silent_mutation
chrII	628943	C	G	silent_mutation
chrII	629013	G	A	silent_mutation
chrII	629133	A	G	silent_mutation
chrII	629145	A	G	silent_mutation
chrII	629259	G	A	conservative_missense_codon	YBR203W
chrII	629636	C	T	synonymous_codon	YBR203W
chrII	629641	G	A	synonymous_codon	YBR203W
chrII	629782	T	C	synonymous_codon	YBR203W
chrII	630052	C	T	synonymous_codon	YBR203W
chrII	630091	T	C	synonymous_codon	YBR203W
chrII	630094	A	G	synonymous_codon	YBR203W
chrII	630671	T	A	conservative_missense_codon	YBR203W
chrII	630784	C	T	synonymous_codon	YBR203W
chrII	630833	C	T	synonymous_codon	YBR203W
chrII	631243	C	T	synonymous_codon	YBR203W
chrII	631321	T	C	synonymous_codon	YBR203W
chrII	631353	G	A	conservative_missense_codon	YBR203W
chrII	631572	A	T	conservative_missense_codon	YBR203W
chrII	631668	T	C	conservative_missense_codon	YBR203W
chrII	631864	T	C	synonymous_codon	YBR203W
chrII	631870	A	G	synonymous_codon	YBR203W
chrII	632170	G	A	silent_mutation
chrII	633957	G	A	synonymous_codon	YBR205W
chrII	633960	C	T	synonymous_codon	YBR205W
chrII	634225	C	T	synonymous_codon	YBR205W
chrII	634599	G	A	synonymous_codon	YBR205W
chrII	635127	G	A	silent_mutation
chrII	635445	A	G	synonymous_codon	YBR207W
chrII	635478	C	T	synonymous_codon	YBR207W
chrII	635928	C	A	synonymous_codon	YBR207W
chrII	635959	G	T	conservative_missense_codon	YBR207W
chrII	636168	C	T	synonymous_codon	YBR207W
chrII	636267	C	T	synonymous_codon	YBR207W
chrII	636372	T	C	synonymous_codon	YBR207W
chrII	636537	A	G	synonymous_codon	YBR207W
chrII	636709	C	G	conservative_missense_codon	YBR208C
chrII	636994	T	C	synonymous_codon	YBR208C
chrII	637041	C	T	conservative_missense_codon	YBR208C
chrII	637063	T	A	conservative_missense_codon	YBR208C
chrII	637264	T	C	synonymous_codon	YBR208C
chrII	637366	T	C	synonymous_codon	YBR208C
chrII	637651	C	G	conservative_missense_codon	YBR208C
chrII	637785	T	C	conservative_missense_codon	YBR208C
chrII	637795	C	A	conservative_missense_codon	YBR208C
chrII	637928	T	G	conservative_missense_codon	YBR208C
chrII	637990	C	T	synonymous_codon	YBR208C
chrII	638086	A	G	synonymous_codon	YBR208C
chrII	638716	A	G	synonymous_codon	YBR208C
chrII	639220	C	G	synonymous_codon	YBR208C
chrII	639337	C	T	synonymous_codon	YBR208C
chrII	639427	A	G	synonymous_codon	YBR208C
chrII	639700	C	T	synonymous_codon	YBR208C
chrII	639745	G	A	synonymous_codon	YBR208C
chrII	639793	G	A	synonymous_codon	YBR208C
chrII	639832	G	A	synonymous_codon	YBR208C
chrII	640834	T	C	conservative_missense_codon	YBR208C
chrII	641071	T	G	synonymous_codon	YBR208C
chrII	641302	C	T	synonymous_codon	YBR208C
chrII	641433	A	G	conservative_missense_codon	YBR208C
chrII	641467	A	G	synonymous_codon	YBR208C
chrII	641842	C	T	synonymous_codon	YBR208C
chrII	642049	C	T	synonymous_codon	YBR208C
chrII	642256	T	C	silent_mutation
chrII	642483	G	A	silent_mutation
chrII	642492	A	G	silent_mutation
chrII	643134	G	A	silent_mutation
chrII	643176	G	A	silent_mutation
chrII	643432	G	A	silent_mutation
chrII	643914	G	A	silent_mutation
chrII	643915	T	A	silent_mutation
chrII	643931	T	C	silent_mutation
chrII	643991	A	C	silent_mutation
chrII	644145	G	A	silent_mutation
chrII	644333	G	T	silent_mutation
chrII	644482	G	C	silent_mutation
chrII	644529	C	T	silent_mutation
chrII	644646	C	T	silent_mutation
chrII	644790	T	C	silent_mutation
chrII	645021	C	T	silent_mutation
chrII	645058	C	A	silent_mutation
chrII	645081	T	C	silent_mutation
chrII	645289	G	A	silent_mutation
chrII	645341	A	G	silent_mutation
chrII	645461	C	T	silent_mutation
chrII	645464	T	C	silent_mutation
chrII	645592	C	T	synonymous_codon	YBR210W
chrII	645738	A	G	synonymous_codon	YBR210W
chrII	645842	C	T	conservative_missense_codon	YBR210W
chrII	646209	C	T	synonymous_codon	YBR211C
chrII	646327	C	T	conservative_missense_codon	YBR211C
chrII	646524	G	A	synonymous_codon	YBR211C
chrII	646843	A	G	conservative_missense_codon	YBR211C
chrII	646863	G	A	synonymous_codon	YBR211C
chrII	646935	A	T	synonymous_codon	YBR211C
chrII	647284	C	T	silent_mutation
chrII	647496	A	C	silent_mutation
chrII	647502	G	A	silent_mutation
chrII	647924	A	G	synonymous_codon	YBR212W
chrII	648554	C	T	synonymous_codon	YBR212W
chrII	648674	C	T	synonymous_codon	YBR212W
chrII	649054	G	C	conservative_missense_codon	YBR212W
chrII	649292	A	G	synonymous_codon	YBR212W
chrII	649517	A	T	synonymous_codon	YBR212W
chrII	649588	C	A	conservative_missense_codon	YBR212W
chrII	649931	T	C	silent_mutation
chrII	650401	A	G	conservative_missense_codon	YBR213W
chrII	650411	A	G	conservative_missense_codon	YBR213W
chrII	650970	T	C	synonymous_codon	YBR213W
chrII	651616	T	A	non_conservative_missense_codon	YBR214W
chrII	652021	C	T	conservative_missense_codon	YBR214W
chrII	652362	C	T	synonymous_codon	YBR214W
chrII	652467	T	C	synonymous_codon	YBR214W
chrII	652587	T	C	synonymous_codon	YBR214W
chrII	652686	T	C	synonymous_codon	YBR214W
chrII	652830	T	C	synonymous_codon	YBR214W
chrII	653007	G	A	silent_mutation
chrII	653133	C	T	silent_mutation
chrII	653239	G	A	silent_mutation
chrII	653275	A	G	silent_mutation
chrII	653427	T	C	silent_mutation
chrII	653429	G	C	silent_mutation
chrII	653440	C	A	silent_mutation
chrII	653730	A	G	synonymous_codon	YBR215W
chrII	653876	G	A	conservative_missense_codon	YBR215W
chrII	654127	C	T	synonymous_codon	YBR215W
chrII	654312	C	T	synonymous_codon	YBR215W
chrII	654339	C	G	synonymous_codon	YBR215W
chrII	654351	T	C	synonymous_codon	YBR215W
chrII	654360	T	C	synonymous_codon	YBR215W
chrII	654388	A	G	conservative_missense_codon	YBR215W
chrII	654468	C	A	synonymous_codon	YBR215W
chrII	654500	G	A	conservative_missense_codon	YBR215W
chrII	654507	T	C	synonymous_codon	YBR215W
chrII	654523	G	T	conservative_missense_codon	YBR215W
chrII	654525	C	T	conservative_missense_codon	YBR215W
chrII	655451	G	A	silent_mutation
chrII	655511	G	A	silent_mutation
chrII	655893	T	C	conservative_missense_codon	YBR216C
chrII	655999	T	C	synonymous_codon	YBR216C
chrII	656068	T	C	synonymous_codon	YBR216C
chrII	656242	A	G	synonymous_codon	YBR216C
chrII	656467	G	A	synonymous_codon	YBR216C
chrII	656530	G	A	synonymous_codon	YBR216C
chrII	656574	T	C	conservative_missense_codon	YBR216C
chrII	656619	A	C	conservative_missense_codon	YBR216C
chrII	656779	T	C	synonymous_codon	YBR216C
chrII	657120	G	T	synonymous_codon	YBR216C
chrII	657562	A	G	synonymous_codon	YBR216C
chrII	657582	T	A	conservative_missense_codon	YBR216C
chrII	658786	T	C	conservative_missense_codon	YBR218C
chrII	658797	G	A	synonymous_codon	YBR218C
chrII	660105	G	A	synonymous_codon	YBR218C
chrII	660237	A	G	synonymous_codon	YBR218C
chrII	660819	C	T	synonymous_codon	YBR218C
chrII	660870	T	A	synonymous_codon	YBR218C
chrII	661854	G	T	conservative_missense_codon	YBR218C
chrII	661878	G	A	synonymous_codon	YBR218C
chrII	662073	G	A	synonymous_codon	YBR218C
chrII	662094	A	G	synonymous_codon	YBR218C
chrII	662112	G	A	synonymous_codon	YBR218C
chrII	662272	C	T	silent_mutation
chrII	662354	G	A	silent_mutation
chrII	662444	G	A	silent_mutation
chrII	662477	T	A	silent_mutation
chrII	662669	C	T	silent_mutation
chrII	662749	G	A	silent_mutation
chrII	663226	G	A	synonymous_codon	YBR219C, YBR220C
chrII	663370	A	G	synonymous_codon	YBR220C
chrII	663448	G	A	synonymous_codon	YBR220C
chrII	663478	C	T	synonymous_codon	YBR220C
chrII	664018	T	C	synonymous_codon	YBR220C
chrII	664165	T	C	synonymous_codon	YBR220C
chrII	664714	A	T	silent_mutation
chrII	664724	C	T	silent_mutation
chrII	666708	A	G	silent_mutation
chrII	667779	A	G	synonymous_codon	YBR222C
chrII	667800	C	A	synonymous_codon	YBR222C
chrII	668585	A	G	silent_mutation
chrII	668650	G	A	silent_mutation
chrII	668867	T	C	synonymous_codon	YBR223C
chrII	668968	C	T	conservative_missense_codon	YBR223C
chrII	668984	A	G	synonymous_codon	YBR223C
chrII	669668	G	A	synonymous_codon	YBR223C
chrII	670083	T	C	conservative_missense_codon	YBR223C
chrII	670302	G	A	conservative_missense_codon	YBR224W
chrII	670311	A	G	conservative_missense_codon	YBR224W
chrII	670742	T	C	conservative_missense_codon	YBR225W
chrII	671044	C	A	conservative_missense_codon	YBR225W
chrII	671376	T	C	synonymous_codon	YBR225W
chrII	672003	A	G	synonymous_codon	YBR225W
chrII	672013	T	C	synonymous_codon	YBR225W
chrII	672200	A	C	conservative_missense_codon	YBR225W
chrII	672318	G	A	synonymous_codon	YBR225W
chrII	673212	C	T	synonymous_codon	YBR225W, YBR226C
chrII	673311	G	A	synonymous_codon	YBR225W, YBR226C
chrII	673390	G	T	conservative_missense_codon	YBR226C
chrII	673806	C	G	synonymous_codon	YBR227C
chrII	674295	T	A	synonymous_codon	YBR227C
chrII	675193	G	A	silent_mutation
chrII	676110	G	A	conservative_missense_codon	YBR228W
chrII	676125	T	C	synonymous_codon	YBR228W
chrII	676341	A	C	silent_mutation
chrII	677266	T	C	synonymous_codon	YBR229C
chrII	677644	C	G	synonymous_codon	YBR229C
chrII	677719	A	G	synonymous_codon	YBR229C
chrII	678781	T	G	synonymous_codon	YBR229C
chrII	678799	C	T	synonymous_codon	YBR229C
chrII	679276	A	C	silent_mutation
chrII	679385	A	C	silent_mutation
chrII	679529	T	C	silent_mutation
chrII	680550	T	C	synonymous_codon	YBR230W-A
chrII	680726	A	G	silent_mutation
chrII	680919	T	C	silent_mutation
chrII	681127	T	A	silent_mutation
chrII	681206	A	T	silent_mutation
chrII	681344	T	G	silent_mutation
chrII	681398	C	T	silent_mutation
chrII	681414	A	G	silent_mutation
chrII	681488	T	A	silent_mutation
chrII	681492	A	G	silent_mutation
chrII	681557	G	A	silent_mutation
chrII	682145	G	T	silent_mutation
chrII	682192	C	T	conservative_missense_codon	YBR231C
chrII	682449	T	C	synonymous_codon	YBR231C
chrII	682968	G	A	synonymous_codon	YBR231C
chrII	683268	A	G	silent_mutation
chrII	683415	C	T	synonymous_codon	YBR232C
chrII	683586	T	C	synonymous_codon	YBR233W, YBR232C
chrII	684585	G	T	synonymous_codon	YBR233W
chrII	684795	A	G	silent_mutation
chrII	684797	G	A	silent_mutation
chrII	685165	A	G	synonymous_codon	YBR233W-A
chrII	685306	T	C	silent_mutation
chrII	685510	C	T	synonymous_codon	YBR234C
chrII	685662	T	C	conservative_missense_codon	YBR234C
chrII	686158	G	A	synonymous_codon	YBR234C
chrII	686563	G	A	synonymous_codon	YBR234C
chrII	686624	C	T	silent_mutation
chrII	686767	A	G	silent_mutation
chrII	686783	G	A	silent_mutation
chrII	687029	C	T	synonymous_codon	YBR235W
chrII	687350	T	C	synonymous_codon	YBR235W
chrII	687626	A	T	synonymous_codon	YBR235W
chrII	687872	T	A	synonymous_codon	YBR235W
chrII	687980	G	A	synonymous_codon	YBR235W
chrII	688355	C	T	synonymous_codon	YBR235W
chrII	688364	G	A	synonymous_codon	YBR235W
chrII	688475	G	A	synonymous_codon	YBR235W
chrII	688487	C	T	synonymous_codon	YBR235W
chrII	688640	G	A	synonymous_codon	YBR235W
chrII	688700	A	T	synonymous_codon	YBR235W
chrII	688949	T	A	synonymous_codon	YBR235W
chrII	689085	A	C	non_conservative_missense_codon	YBR235W
chrII	689156	C	T	synonymous_codon	YBR235W
chrII	689867	G	C	synonymous_codon	YBR235W
chrII	689912	G	A	synonymous_codon	YBR235W
chrII	689996	A	C	synonymous_codon	YBR235W
chrII	690123	T	C	synonymous_codon	YBR235W
chrII	690313	T	C	silent_mutation
chrII	690330	G	A	silent_mutation
chrII	691208	T	C	synonymous_codon	YBR236C
chrII	691367	C	T	synonymous_codon	YBR236C
chrII	691485	G	T	non_conservative_missense_codon	YBR236C
chrII	691521	A	G	conservative_missense_codon	YBR236C
chrII	691649	G	A	synonymous_codon	YBR236C
chrII	691707	G	C	silent_mutation
chrII	691742	T	C	silent_mutation
chrII	691776	G	T	silent_mutation
chrII	691838	G	A	silent_mutation
chrII	691869	G	A	silent_mutation
chrII	691880	A	G	silent_mutation
chrII	691893	T	C	silent_mutation
chrII	691937	C	T	silent_mutation
chrII	691950	C	T	silent_mutation
chrII	692083	C	A	conservative_missense_codon	YBR237W
chrII	692126	G	C	conservative_missense_codon	YBR237W
chrII	692195	A	G	conservative_missense_codon	YBR237W
chrII	692366	A	T	non_conservative_missense_codon	YBR237W
chrII	692680	C	T	conservative_missense_codon	YBR237W
chrII	692883	C	T	synonymous_codon	YBR237W
chrII	692889	C	T	synonymous_codon	YBR237W
chrII	693069	A	T	synonymous_codon	YBR237W
chrII	693391	G	A	conservative_missense_codon	YBR237W
chrII	693469	C	T	conservative_missense_codon	YBR237W
chrII	693651	T	C	synonymous_codon	YBR237W
chrII	693825	T	A	synonymous_codon	YBR237W
chrII	693923	T	C	non_conservative_missense_codon	YBR237W
chrII	693925	G	A	conservative_missense_codon	YBR237W
chrII	693928	C	T	conservative_missense_codon	YBR237W
chrII	694124	G	A	conservative_missense_codon	YBR237W
chrII	694133	G	A	conservative_missense_codon	YBR237W
chrII	694151	T	A	non_conservative_missense_codon	YBR237W
chrII	694153	T	C	conservative_missense_codon	YBR237W
chrII	694443	A	T	synonymous_codon	YBR237W
chrII	694512	A	G	synonymous_codon	YBR237W
chrII	694669	G	A	silent_mutation
chrII	694728	G	A	silent_mutation
chrII	695368	T	C	synonymous_codon	YBR238C
chrII	695575	T	C	synonymous_codon	YBR238C
chrII	695857	A	T	synonymous_codon	YBR238C
chrII	696541	T	C	synonymous_codon	YBR238C
chrII	696652	T	C	synonymous_codon	YBR238C
chrII	696781	A	G	synonymous_codon	YBR238C
chrII	697043	T	C	conservative_missense_codon	YBR238C
chrII	697455	C	T	silent_mutation
chrII	697695	C	T	silent_mutation
chrII	697855	C	A	silent_mutation
chrII	697900	T	G	silent_mutation
chrII	697912	C	T	silent_mutation
chrII	697933	C	A	silent_mutation
chrII	698208	C	T	silent_mutation
chrII	698648	A	T	synonymous_codon	YBR239C
chrII	698958	T	C	conservative_missense_codon	YBR239C
chrII	699308	T	C	conservative_missense_codon	YBR239C
chrII	699380	G	A	synonymous_codon	YBR239C
chrII	699560	T	C	synonymous_codon	YBR239C
chrII	699675	T	C	conservative_missense_codon	YBR239C
chrII	699878	A	G	synonymous_codon	YBR239C
chrII	700005	A	G	silent_mutation
chrII	700064	G	C	silent_mutation
chrII	700097	T	C	silent_mutation
chrII	700199	A	T	silent_mutation
chrII	700223	G	C	silent_mutation
chrII	700246	T	C	silent_mutation
chrII	700349	C	T	silent_mutation
chrII	700423	T	C	silent_mutation
chrII	700682	G	A	synonymous_codon	YBR240C
chrII	700715	C	T	synonymous_codon	YBR240C
chrII	700736	G	A	synonymous_codon	YBR240C
chrII	750883	G	A	synonymous_codon	YBR274W
chrII	752417	T	C	conservative_missense_codon	YBR275C
chrII	752501	G	C	conservative_missense_codon	YBR275C
chrII	753942	C	T	synonymous_codon	YBR275C
chrII	753990	T	C	synonymous_codon	YBR275C
chrII	754029	A	G	synonymous_codon	YBR275C
chrII	754103	A	T	conservative_missense_codon	YBR275C
chrII	754139	G	A	synonymous_codon	YBR275C
chrII	754188	G	A	synonymous_codon	YBR275C
chrII	754197	T	C	synonymous_codon	YBR275C
chrII	754355	G	A	synonymous_codon	YBR275C
chrII	754404	A	G	synonymous_codon	YBR275C
chrII	754416	A	G	synonymous_codon	YBR275C
chrII	754436	T	C	conservative_missense_codon	YBR275C
chrII	754776	G	A	synonymous_codon	YBR275C
chrII	754911	A	G	synonymous_codon	YBR275C
chrII	756042	T	C	synonymous_codon	YBR275C
chrII	756063	G	A	synonymous_codon	YBR275C
chrII	756110	C	T	conservative_missense_codon	YBR275C
chrII	756201	A	G	synonymous_codon	YBR275C
chrII	756213	G	A	synonymous_codon	YBR275C
chrII	756267	T	C	synonymous_codon	YBR275C
chrII	756533	C	A	conservative_missense_codon	YBR275C
chrII	756709	G	A	non_conservative_missense_codon	YBR275C
chrII	757029	G	A	synonymous_codon	YBR275C
chrII	757438	A	G	silent_mutation
chrII	757908	G	A	synonymous_codon	YBR276C
chrII	758568	A	G	synonymous_codon	YBR276C
chrII	758608	T	C	conservative_missense_codon	YBR276C
chrII	758926	T	A	non_conservative_missense_codon	YBR276C
chrII	758975	T	G	conservative_missense_codon	YBR276C
chrII	759134	C	T	conservative_missense_codon	YBR276C
chrII	759221	G	T	conservative_missense_codon	YBR276C
chrII	759357	G	A	synonymous_codon	YBR276C
chrII	759661	G	T	non_conservative_missense_codon	YBR276C
chrII	759726	T	C	synonymous_codon	YBR276C
chrII	760248	C	T	synonymous_codon	YBR277C
chrII	760255	A	T	non_conservative_missense_codon	YBR277C
chrII	760302	C	T	synonymous_codon	YBR278W, YBR277C
chrII	760365	C	T	synonymous_codon	YBR278W, YBR277C
chrII	760599	G	A	synonymous_codon	YBR278W, YBR277C
chrII	760767	A	G	synonymous_codon	YBR278W
chrII	760848	C	T	synonymous_codon	YBR278W
chrII	760904	G	A	silent_mutation
chrII	760960	C	T	silent_mutation
chrII	761030	A	T	silent_mutation
chrII	761033	A	T	silent_mutation
chrII	761038	G	T	silent_mutation
chrII	761049	C	T	silent_mutation
chrII	761051	G	A	silent_mutation
chrII	761056	G	A	silent_mutation
chrII	761061	G	A	silent_mutation
chrII	761079	T	A	silent_mutation
chrII	761108	T	C	silent_mutation
chrII	761118	T	C	silent_mutation
chrII	761121	C	T	silent_mutation
chrII	761436	A	G	synonymous_codon	YBR279W
chrII	761454	T	C	synonymous_codon	YBR279W
chrII	761529	G	A	synonymous_codon	YBR279W
chrII	761787	G	A	synonymous_codon	YBR279W
chrII	761814	C	T	synonymous_codon	YBR279W
chrII	761832	T	C	synonymous_codon	YBR279W
chrII	761853	T	C	synonymous_codon	YBR279W
chrII	761880	A	G	synonymous_codon	YBR279W
chrII	761901	A	G	synonymous_codon	YBR279W
chrII	761904	T	C	synonymous_codon	YBR279W
chrII	761943	A	G	synonymous_codon	YBR279W
chrII	761970	A	G	synonymous_codon	YBR279W
chrII	762336	T	C	synonymous_codon	YBR279W
chrII	762393	G	A	synonymous_codon	YBR279W
chrII	762475	G	A	conservative_missense_codon	YBR279W
chrII	762665	A	G	silent_mutation
chrII	763111	T	A	synonymous_codon	YBR280C
chrII	763117	C	T	synonymous_codon	YBR280C
chrII	763218	G	A	synonymous_codon	YBR280C
chrII	763300	A	G	synonymous_codon	YBR280C
chrII	763438	A	G	synonymous_codon	YBR280C
chrII	763488	G	A	synonymous_codon	YBR280C
chrII	763528	T	C	synonymous_codon	YBR280C
chrII	763762	C	T	conservative_missense_codon	YBR280C
chrII	763909	C	T	synonymous_codon	YBR280C
chrII	764050	T	C	synonymous_codon	YBR280C
chrII	764110	G	A	synonymous_codon	YBR280C
chrII	764239	T	C	synonymous_codon	YBR280C
chrII	766137	A	G	synonymous_codon	YBR281C
chrII	766176	T	C	synonymous_codon	YBR281C
chrII	766200	C	G	synonymous_codon	YBR281C
chrII	766335	C	A	non_conservative_missense_codon	YBR281C
chrII	766339	A	G	non_conservative_missense_codon	YBR281C
chrII	767058	T	C	synonymous_codon	YBR281C
chrII	767298	G	A	synonymous_codon	YBR281C
chrII	767375	C	T	non_conservative_missense_codon	YBR281C
chrII	767560	C	T	conservative_missense_codon	YBR281C
chrII	767582	A	C	conservative_missense_codon	YBR281C
chrII	767690	A	T	silent_mutation
chrII	767991	A	G	silent_mutation
chrII	768079	T	C	silent_mutation
chrII	768130	T	A	silent_mutation
chrII	768173	A	T	silent_mutation
chrII	768174	A	G	silent_mutation
chrII	768259	C	T	non_conservative_missense_codon	YBR282W
chrII	768260	T	G	non_conservative_missense_codon	YBR282W
chrII	768449	T	C	synonymous_codon	YBR282W
chrII	769123	T	A	synonymous_codon	YBR283C
chrIII	13001	A	T	synonymous_codon	YCL067C
chrIII	44288	A	G	synonymous_codon	YCL047C
chrIII	59315	A	G	conservative_missense_codon	YCL036W
chrIII	69652	T	C	synonymous_codon	YCL029C
chrIII	72645	C	T	synonymous_codon	YCL027W
chrIII	84421	G	A	silent_mutation
chrIII	143131	T	C	silent_mutation
chrIII	148615	C	T	conservative_missense_codon	YCR018C
chrIII	162361	T	C	silent_mutation
chrIII	162396	G	C	silent_mutation
chrIII	162640	T	G	non_conservative_missense_codon	YCR024C-B
chrIII	162694	G	A	synonymous_codon	YCR024C-B
chrIII	163059	T	C	synonymous_codon	YCR024C-A
chrIII	198937	T	G	conservative_missense_codon	YCR038C
chrIII	199358	G	A	synonymous_codon	YCR038C, YCR038W-A
chrIII	200850	G	C	conservative_missense_codon	YCR040W
chrIII	257960	T	C	conservative_missense_codon	YCR081W
chrIII	258780	T	G	silent_mutation
chrIII	258828	G	C	silent_mutation
chrIII	258915	G	A	synonymous_codon	YCR082W
chrIII	259351	G	A	silent_mutation
chrIII	259489	A	G	silent_mutation
chrIII	259496	T	C	silent_mutation
chrIII	259724	T	C	synonymous_codon	YCR083W
chrIII	259975	G	A	silent_mutation
chrIII	260010	A	G	silent_mutation
chrIII	260400	G	A	conservative_missense_codon	YCR084C
chrIII	260698	A	C	synonymous_codon	YCR084C
chrIII	261312	G	A	synonymous_codon	YCR084C
chrIII	261331	A	G	synonymous_codon	YCR084C
chrIII	262105	C	T	synonymous_codon	YCR084C
chrIII	262154	C	T	conservative_missense_codon	YCR084C
chrIII	262229	T	G	non_conservative_missense_codon	YCR084C
chrIII	262264	T	C	synonymous_codon	YCR084C
chrIII	262761	A	G	silent_mutation
chrIII	262830	T	G	silent_mutation
chrIII	263029	A	G	synonymous_codon	YCR085W
chrIII	263282	C	T	silent_mutation
chrIII	263790	A	C	synonymous_codon	YCR086W
chrIII	264135	A	T	conservative_missense_codon	YCR087W
chrIII	264135	A	T	synonymous_codon	YCR087C-A
chrIII	264282	C	T	stop_gained	YCR087W
chrIII	264282	C	T	synonymous_codon	YCR087C-A
chrIII	264441	A	G	conservative_missense_codon	YCR087W
chrIII	264441	A	G	synonymous_codon	YCR087C-A
chrIII	264610	T	C	silent_mutation
chrIII	264634	G	A	silent_mutation
chrIII	264642	T	C	silent_mutation
chrIII	264655	T	C	silent_mutation
chrIII	264887	T	C	silent_mutation
chrIII	265045	C	T	silent_mutation
chrIII	265091	T	C	synonymous_codon	YCR088W
chrIII	265240	T	C	non_conservative_missense_codon	YCR088W
chrIII	266048	C	T	synonymous_codon	YCR088W
chrIII	266241	C	T	conservative_missense_codon	YCR088W
chrIII	266271	G	A	conservative_missense_codon	YCR088W
chrIII	266282	C	T	synonymous_codon	YCR088W
chrIII	266283	G	C	conservative_missense_codon	YCR088W
chrIII	266399	C	G	conservative_missense_codon	YCR088W
chrIII	267375	T	C	silent_mutation
chrIII	271337	C	G	conservative_missense_codon	YCR089W
chrIII	272101	C	T	synonymous_codon	YCR089W
chrIII	273439	C	T	silent_mutation
chrIII	273446	A	G	silent_mutation
chrIII	273450	A	T	silent_mutation
chrIII	273452	T	G	silent_mutation
chrIII	273474	T	C	silent_mutation
chrIII	273518	T	C	silent_mutation
chrIII	273523	T	G	silent_mutation
chrIII	273706	A	G	silent_mutation
chrIII	273723	T	G	silent_mutation
chrIII	274374	T	C	silent_mutation
chrIII	274530	A	G	conservative_missense_codon	YCR091W
chrIII	274723	G	A	conservative_missense_codon	YCR091W
chrIII	278100	T	C	conservative_missense_codon	YCR092C
chrIII	279258	T	C	conservative_missense_codon	YCR092C
chrIII	280449	T	G	synonymous_codon	YCR093W
chrIII	286652	G	T	silent_mutation
chrIII	290460	A	G	silent_mutation
chrIII	292183	G	A	silent_mutation
chrIII	292247	C	G	silent_mutation
chrIII	292282	C	A	silent_mutation
chrIII	292937	C	T	silent_mutation
chrIII	293842	A	G	conservative_missense_codon	YCR097W
chrIII	294389	A	T	silent_mutation
chrIII	294593	T	C	conservative_missense_codon	YCR097W-A
chrIII	296689	C	A	silent_mutation
chrIII	297919	G	A	synonymous_codon	YCR098C
chrIII	298117	G	A	synonymous_codon	YCR098C
chrIII	298326	G	A	synonymous_codon	YCR098C
chrIII	298402	T	C	synonymous_codon	YCR098C
chrIII	298408	A	G	synonymous_codon	YCR098C
chrIII	298441	C	T	synonymous_codon	YCR098C
chrIII	298548	G	A	conservative_missense_codon	YCR098C
chrIII	298597	G	A	synonymous_codon	YCR098C
chrIII	298726	T	G	silent_mutation
chrIII	298764	C	T	silent_mutation
chrIII	298878	C	G	silent_mutation
chrIII	298949	A	C	silent_mutation
chrIII	298996	A	G	silent_mutation
chrIII	299098	C	T	silent_mutation
chrIII	299155	C	G	silent_mutation
chrIII	299165	G	T	silent_mutation
chrIII	299184	C	A	silent_mutation
chrIII	299220	T	C	silent_mutation
chrIII	299262	A	G	silent_mutation
chrIII	299288	A	G	silent_mutation
chrIII	299395	G	A	silent_mutation
chrIII	299645	T	C	silent_mutation
chrIII	299687	C	T	silent_mutation
chrIII	299701	T	C	silent_mutation
chrIII	300695	G	A	silent_mutation
chrIII	300804	C	G	silent_mutation
chrIII	301452	A	G	conservative_missense_codon	YCR100C
chrIII	301736	A	G	synonymous_codon	YCR100C
chrIII	302896	G	C	synonymous_codon	YCR101C
chrIII	302979	G	A	synonymous_codon	YCR101C
chrIII	303499	C	T	silent_mutation
chrIII	303798	G	A	silent_mutation
chrIII	304102	A	G	silent_mutation
chrIII	304825	G	C	conservative_missense_codon	YCR102C
chrIII	306561	T	C	silent_mutation
chrIII	306575	C	T	silent_mutation
chrIII	306783	G	A	conservative_missense_codon	YCR102W-A
chrIII	306964	A	G	silent_mutation
chrIII	306967	T	A	silent_mutation
chrIII	306974	C	T	silent_mutation
chrIII	306978	C	T	silent_mutation
chrIII	306992	C	T	silent_mutation
chrIII	307016	G	A	silent_mutation
chrIII	307039	A	T	silent_mutation
chrIII	307149	A	T	silent_mutation
chrIII	307421	G	A	silent_mutation
chrIII	307422	C	A	silent_mutation
chrIII	307428	C	T	silent_mutation
chrIII	307429	T	G	silent_mutation
chrIII	307443	T	C	silent_mutation
chrIII	307465	C	T	silent_mutation
chrIII	307468	G	A	silent_mutation
chrIII	307477	T	C	silent_mutation
chrIII	307489	C	T	silent_mutation
chrIII	307630	G	A	silent_mutation
chrIII	307643	C	A	silent_mutation
chrIII	307644	T	G	silent_mutation
chrIII	307648	T	C	silent_mutation
chrIII	307649	G	T	silent_mutation
chrIII	307650	A	G	silent_mutation
chrIII	307652	C	T	silent_mutation
chrIII	307654	T	C	silent_mutation
chrIII	307656	T	A	silent_mutation
chrIII	307659	T	C	silent_mutation
chrIII	307661	A	G	silent_mutation
chrIII	307674	G	A	silent_mutation
chrIII	307678	T	C	silent_mutation
chrIII	307679	G	A	silent_mutation
chrIII	307681	T	C	silent_mutation
chrIII	307682	G	A	silent_mutation
chrIII	307685	A	C	silent_mutation
chrIII	307686	G	C	silent_mutation
chrIII	307690	G	A	silent_mutation
chrIII	307691	A	G	silent_mutation
chrIII	307696	C	T	silent_mutation
chrIII	307718	A	T	silent_mutation
chrIII	307719	A	G	silent_mutation
chrIII	307720	C	T	silent_mutation
chrIII	307721	T	C	silent_mutation
chrIII	307722	A	C	silent_mutation
chrIII	307723	T	C	silent_mutation
chrIII	307727	C	T	silent_mutation
chrIII	307731	T	A	silent_mutation
chrIII	307732	G	A	silent_mutation
chrIII	307735	G	A	silent_mutation
chrIII	307740	C	T	silent_mutation
chrIII	307741	G	C	silent_mutation
chrIII	307742	C	T	silent_mutation
chrIII	307746	C	T	silent_mutation
chrIII	307760	T	C	silent_mutation
chrIII	307763	T	C	silent_mutation
chrIII	307768	A	C	silent_mutation
chrIII	307772	C	T	silent_mutation
chrIII	307852	A	G	conservative_missense_codon	YCR104W
chrIII	310319	G	C	silent_mutation
chrIII	311513	T	C	conservative_missense_codon	YCR106W
chrIII	312423	G	A	conservative_missense_codon	YCR106W
chrIII	313914	T	C	conservative_missense_codon	YCR107W
chrIII	314456	C	T	synonymous_codon	YCR107W
chrIII	315914	T	C	silent_mutation
chrIII	316117	C	T	synonymous_codon	YCR108C
chrIII	316156	C	A	synonymous_codon	YCR108C
chrIII	316159	C	G	conservative_missense_codon	YCR108C
chrIII	316167	T	C	conservative_missense_codon	YCR108C
chrIII	316174	A	G	conservative_missense_codon	YCR108C
chrIII	316176	G	A	conservative_missense_codon	YCR108C
chrIII	316179	A	G	conservative_missense_codon	YCR108C
chrIII	316180	G	C	stop_gained	YCR108C
chrIII	316194	G	A	silent_mutation
chrIII	316199	T	G	silent_mutation
chrIII	316239	C	T	silent_mutation
chrIII	316262	T	A	silent_mutation
chrIV	1624	T	A	silent_mutation
chrIV	1631	C	T	silent_mutation
chrIV	1633	T	C	silent_mutation
chrIV	1651	C	T	silent_mutation
chrIV	1724	C	T	silent_mutation
chrIV	1817	G	C	conservative_missense_codon	YDL248W
chrIV	1819	C	T	conservative_missense_codon	YDL248W
chrIV	1823	G	A	conservative_missense_codon	YDL248W
chrIV	1831	A	G	synonymous_codon	YDL248W
chrIV	1834	C	T	synonymous_codon	YDL248W
chrIV	1843	G	A	synonymous_codon	YDL248W
chrIV	2008	T	G	non_conservative_missense_codon	YDL248W
chrIV	2009	A	G	conservative_missense_codon	YDL248W
chrIV	2035	G	T	synonymous_codon	YDL248W
chrIV	2045	C	T	conservative_missense_codon	YDL248W
chrIV	2046	T	G	conservative_missense_codon	YDL248W
chrIV	2060	G	C	conservative_missense_codon	YDL248W
chrIV	2062	C	T	conservative_missense_codon	YDL248W
chrIV	2066	G	T	conservative_missense_codon	YDL248W
chrIV	2072	T	C	non_conservative_missense_codon	YDL248W
chrIV	2076	G	A	conservative_missense_codon	YDL248W
chrIV	2087	A	G	conservative_missense_codon	YDL248W
chrIV	2112	T	C	conservative_missense_codon	YDL248W
chrIV	2135	G	A	conservative_missense_codon	YDL248W
chrIV	2151	C	T	non_conservative_missense_codon	YDL248W
chrIV	2152	T	G	non_conservative_missense_codon	YDL248W
chrIV	2156	C	A	conservative_missense_codon	YDL248W
chrIV	2584	C	A	synonymous_codon	YDL248W
chrIV	2800	C	G	conservative_missense_codon	YDL248W
chrIV	3566	G	A	silent_mutation
chrIV	4142	T	A	silent_mutation
chrIV	4232	G	C	silent_mutation
chrIV	5408	A	T	silent_mutation
chrIV	7809	C	T	synonymous_codon	YDL247W
chrIV	18195	A	C	synonymous_codon	YDL243C
chrIV	18200	A	G	synonymous_codon	YDL243C
chrIV	18219	A	G	synonymous_codon	YDL243C
chrIV	18231	T	A	synonymous_codon	YDL243C
chrIV	18264	T	A	synonymous_codon	YDL243C
chrIV	18279	A	G	synonymous_codon	YDL243C
chrIV	18291	G	A	synonymous_codon	YDL243C
chrIV	18303	C	T	synonymous_codon	YDL243C
chrIV	18312	C	T	synonymous_codon	YDL243C
chrIV	18325	T	C	conservative_missense_codon	YDL243C
chrIV	18333	A	G	synonymous_codon	YDL243C
chrIV	18342	A	G	synonymous_codon	YDL243C
chrIV	18345	G	A	synonymous_codon	YDL243C
chrIV	18351	A	G	synonymous_codon	YDL243C
chrIV	18357	A	C	synonymous_codon	YDL243C
chrIV	18360	G	T	non_conservative_missense_codon	YDL243C
chrIV	18361	C	T	non_conservative_missense_codon	YDL243C
chrIV	18362	C	T	non_conservative_missense_codon	YDL243C
chrIV	18363	A	G	synonymous_codon	YDL243C
chrIV	18369	T	A	conservative_missense_codon	YDL243C
chrIV	18376	T	C	non_conservative_missense_codon	YDL243C
chrIV	18377	T	C	non_conservative_missense_codon	YDL243C
chrIV	18387	T	C	conservative_missense_codon	YDL243C
chrIV	18388	C	G	conservative_missense_codon	YDL243C
chrIV	18389	C	T	conservative_missense_codon	YDL243C
chrIV	18396	C	T	synonymous_codon	YDL243C
chrIV	18399	G	A	synonymous_codon	YDL243C
chrIV	18413	T	C	conservative_missense_codon	YDL243C
chrIV	18414	T	C	synonymous_codon	YDL243C
chrIV	18425	A	G	synonymous_codon	YDL243C
chrIV	18426	C	T	synonymous_codon	YDL243C
chrIV	18436	T	G	non_conservative_missense_codon	YDL243C
chrIV	18437	T	C	non_conservative_missense_codon	YDL243C
chrIV	18450	T	G	synonymous_codon	YDL243C
chrIV	18457	A	G	conservative_missense_codon	YDL243C
chrIV	18467	C	G	conservative_missense_codon	YDL243C
chrIV	18468	T	C	synonymous_codon	YDL243C
chrIV	18473	T	A	non_conservative_missense_codon	YDL243C
chrIV	18474	T	C	synonymous_codon	YDL243C
chrIV	18477	G	A	synonymous_codon	YDL243C
chrIV	18481	C	T	conservative_missense_codon	YDL243C
chrIV	18483	G	A	synonymous_codon	YDL243C
chrIV	18499	C	A	non_conservative_missense_codon	YDL243C
chrIV	18504	A	T	synonymous_codon	YDL243C
chrIV	18507	T	G	synonymous_codon	YDL243C
chrIV	18516	A	G	synonymous_codon	YDL243C
chrIV	18531	A	T	synonymous_codon	YDL243C
chrIV	18540	A	G	synonymous_codon	YDL243C
chrIV	18571	C	G	silent_mutation
chrIV	18588	G	A	silent_mutation
chrIV	18590	T	G	silent_mutation
chrIV	18603	C	T	silent_mutation
chrIV	18605	G	A	silent_mutation
chrIV	18606	A	G	silent_mutation
chrIV	18612	C	T	silent_mutation
chrIV	18615	T	A	silent_mutation
chrIV	18624	T	G	silent_mutation
chrIV	18651	G	A	silent_mutation
chrIV	18663	C	T	silent_mutation
chrIV	18671	G	C	silent_mutation
chrIV	18675	T	C	silent_mutation
chrIV	18682	A	G	silent_mutation
chrIV	18683	G	C	silent_mutation
chrIV	19638	C	T	silent_mutation
chrIV	21510	A	G	silent_mutation
chrIV	23647	T	C	synonymous_codon	YDL240W
chrIV	24841	G	T	conservative_missense_codon	YDL240W
chrIV	26679	C	T	synonymous_codon	YDL239C
chrIV	26950	C	A	conservative_missense_codon	YDL239C
chrIV	27235	T	C	conservative_missense_codon	YDL239C
chrIV	27879	G	T	conservative_missense_codon	YDL239C
chrIV	28542	C	T	synonymous_codon	YDL239C
chrIV	28639	T	C	conservative_missense_codon	YDL239C
chrIV	30404	C	T	synonymous_codon	YDL238C
chrIV	30826	A	C	non_conservative_missense_codon	YDL237W
chrIV	31224	G	T	conservative_missense_codon	YDL237W
chrIV	33211	A	G	conservative_missense_codon	YDL236W
chrIV	33904	G	C	synonymous_codon	YDL235C
chrIV	34063	C	T	silent_mutation
chrIV	37123	C	T	synonymous_codon	YDL233W
chrIV	38160	A	T	conservative_missense_codon	YDL233W
chrIV	38200	C	T	silent_mutation
chrIV	39021	G	T	conservative_missense_codon	YDL231C
chrIV	40439	T	C	synonymous_codon	YDL231C
chrIV	101433	T	G	conservative_missense_codon	YDL199C
chrIV	164013	G	A	synonymous_codon	YDL166C
chrIV	164045	T	C	silent_mutation
chrIV	164089	C	T	silent_mutation
chrIV	164238	C	T	silent_mutation
chrIV	164256	G	A	silent_mutation
chrIV	164281	C	G	silent_mutation
chrIV	164439	C	T	synonymous_codon	YDL165W
chrIV	164580	C	T	synonymous_codon	YDL165W
chrIV	164987	C	T	synonymous_codon	YDL164C
chrIV	165265	A	G	synonymous_codon	YDL164C
chrIV	165341	G	A	synonymous_codon	YDL164C
chrIV	165386	T	C	synonymous_codon	YDL164C
chrIV	165975	A	G	conservative_missense_codon	YDL164C
chrIV	166100	T	C	synonymous_codon	YDL164C
chrIV	166418	T	C	synonymous_codon	YDL164C
chrIV	166427	G	A	synonymous_codon	YDL164C
chrIV	166604	G	A	synonymous_codon	YDL164C
chrIV	166634	T	C	synonymous_codon	YDL164C
chrIV	167295	C	T	silent_mutation
chrIV	167859	G	A	conservative_missense_codon	YDL161W
chrIV	168238	T	C	synonymous_codon	YDL161W
chrIV	168256	G	A	synonymous_codon	YDL161W
chrIV	170327	T	C	silent_mutation
chrIV	170349	G	A	silent_mutation
chrIV	170354	T	C	silent_mutation
chrIV	170455	T	C	synonymous_codon	YDL160C
chrIV	170914	G	A	synonymous_codon	YDL160C
chrIV	170953	G	A	synonymous_codon	YDL160C
chrIV	171294	A	G	synonymous_codon	YDL160C
chrIV	174272	T	G	non_conservative_missense_codon	YDL157C
chrIV	174831	C	T	silent_mutation
chrIV	174887	C	T	silent_mutation
chrIV	174905	T	C	silent_mutation
chrIV	174995	T	C	synonymous_codon	YDL156W
chrIV	174996	T	C	synonymous_codon	YDL156W
chrIV	174998	G	T	synonymous_codon	YDL156W
chrIV	175307	C	G	conservative_missense_codon	YDL156W
chrIV	175412	G	T	conservative_missense_codon	YDL156W
chrIV	175847	A	G	synonymous_codon	YDL156W
chrIV	175946	C	T	synonymous_codon	YDL156W
chrIV	176019	A	G	conservative_missense_codon	YDL156W
chrIV	176064	A	G	conservative_missense_codon	YDL156W
chrIV	176423	T	C	synonymous_codon	YDL156W
chrIV	176519	T	C	silent_mutation
chrIV	176628	C	T	silent_mutation
chrIV	177160	T	C	synonymous_codon	YDL155W
chrIV	177207	A	G	synonymous_codon	YDL155W
chrIV	177330	C	T	synonymous_codon	YDL155W
chrIV	177363	A	G	synonymous_codon	YDL155W
chrIV	177756	C	T	synonymous_codon	YDL155W
chrIV	177780	T	C	synonymous_codon	YDL155W
chrIV	177807	C	T	synonymous_codon	YDL155W
chrIV	178032	A	G	synonymous_codon	YDL155W
chrIV	178058	A	T	silent_mutation
chrIV	178389	G	A	conservative_missense_codon	YDL154W
chrIV	178453	T	G	conservative_missense_codon	YDL154W
chrIV	178489	C	G	synonymous_codon	YDL154W
chrIV	178580	A	C	conservative_missense_codon	YDL154W
chrIV	178930	G	A	synonymous_codon	YDL154W
chrIV	178974	A	G	conservative_missense_codon	YDL154W
chrIV	179020	T	C	synonymous_codon	YDL154W
chrIV	179105	C	A	conservative_missense_codon	YDL154W
chrIV	179134	C	T	synonymous_codon	YDL154W
chrIV	179240	T	C	synonymous_codon	YDL154W
chrIV	179328	G	C	conservative_missense_codon	YDL154W
chrIV	179480	G	A	conservative_missense_codon	YDL154W
chrIV	179487	C	G	conservative_missense_codon	YDL154W
chrIV	179632	C	T	synonymous_codon	YDL154W
chrIV	179651	A	G	conservative_missense_codon	YDL154W
chrIV	179674	G	T	synonymous_codon	YDL154W
chrIV	179696	A	C	conservative_missense_codon	YDL154W
chrIV	179714	A	C	conservative_missense_codon	YDL154W
chrIV	179755	G	A	synonymous_codon	YDL154W
chrIV	179890	A	G	synonymous_codon	YDL154W
chrIV	180086	G	A	conservative_missense_codon	YDL154W
chrIV	180121	G	A	synonymous_codon	YDL154W
chrIV	180309	T	C	conservative_missense_codon	YDL154W
chrIV	180382	A	G	synonymous_codon	YDL154W
chrIV	180628	A	G	synonymous_codon	YDL154W
chrIV	180644	A	C	conservative_missense_codon	YDL154W
chrIV	181978	T	G	conservative_missense_codon	YDL153C
chrIV	181988	C	T	conservative_missense_codon	YDL153C
chrIV	182019	G	C	conservative_missense_codon	YDL153C
chrIV	182498	A	G	conservative_missense_codon	YDL153C
chrIV	182600	G	C	conservative_missense_codon	YDL153C
chrIV	182859	G	A	conservative_missense_codon	YDL152W
chrIV	182859	G	A	synonymous_codon	YDL153C
chrIV	183011	C	T	conservative_missense_codon	YDL153C
chrIV	183011	C	T	non_conservative_missense_codon	YDL152W
chrIV	183466	G	A	conservative_missense_codon	YDL150W
chrIV	183466	G	A	non_conservative_missense_codon	YDL151C
chrIV	183645	C	T	synonymous_codon	YDL151C, YDL150W
chrIV	183726	G	A	synonymous_codon	YDL151C, YDL150W
chrIV	183756	T	C	synonymous_codon	YDL151C, YDL150W
chrIV	183759	G	T	conservative_missense_codon	YDL151C, YDL150W
chrIV	183912	A	G	synonymous_codon	YDL150W
chrIV	183975	C	T	synonymous_codon	YDL150W
chrIV	184169	C	T	conservative_missense_codon	YDL150W
chrIV	184221	A	G	synonymous_codon	YDL150W
chrIV	184320	A	G	synonymous_codon	YDL150W
chrIV	184697	A	T	silent_mutation
chrIV	184893	C	T	silent_mutation
chrIV	185023	T	C	synonymous_codon	YDL149W
chrIV	185188	G	A	synonymous_codon	YDL149W
chrIV	185256	C	T	conservative_missense_codon	YDL149W
chrIV	185449	T	C	synonymous_codon	YDL149W
chrIV	185452	G	A	synonymous_codon	YDL149W
chrIV	185458	C	G	non_conservative_missense_codon	YDL149W
chrIV	185497	G	A	synonymous_codon	YDL149W
chrIV	185528	G	A	conservative_missense_codon	YDL149W
chrIV	185548	T	C	synonymous_codon	YDL149W
chrIV	185567	C	T	conservative_missense_codon	YDL149W
chrIV	185597	C	T	conservative_missense_codon	YDL149W
chrIV	185668	C	T	synonymous_codon	YDL149W
chrIV	185683	T	C	synonymous_codon	YDL149W
chrIV	185704	A	G	synonymous_codon	YDL149W
chrIV	185746	C	T	synonymous_codon	YDL149W
chrIV	185783	T	C	synonymous_codon	YDL149W
chrIV	186712	G	A	synonymous_codon	YDL149W
chrIV	186841	C	T	synonymous_codon	YDL149W
chrIV	187060	C	T	synonymous_codon	YDL149W
chrIV	187198	G	T	conservative_missense_codon	YDL149W
chrIV	187216	C	T	synonymous_codon	YDL149W
chrIV	187293	A	G	conservative_missense_codon	YDL149W
chrIV	187696	G	T	synonymous_codon	YDL149W
chrIV	187789	C	T	synonymous_codon	YDL149W
chrIV	188103	C	G	silent_mutation
chrIV	188150	T	C	silent_mutation
chrIV	188469	T	C	synonymous_codon	YDL148C
chrIV	189502	C	T	conservative_missense_codon	YDL148C
chrIV	189732	G	A	synonymous_codon	YDL148C
chrIV	190140	G	A	synonymous_codon	YDL148C
chrIV	190212	C	A	synonymous_codon	YDL148C
chrIV	190497	C	T	synonymous_codon	YDL148C
chrIV	190604	T	G	silent_mutation
chrIV	190672	G	A	silent_mutation
chrIV	190810	C	T	silent_mutation
chrIV	190888	C	G	silent_mutation
chrIV	191044	G	C	conservative_missense_codon	YDL147W
chrIV	191112	A	G	synonymous_codon	YDL147W
chrIV	191355	G	A	synonymous_codon	YDL147W
chrIV	192247	T	C	synonymous_codon	YDL147W
chrIV	192278	G	C	silent_mutation
chrIV	192319	T	C	silent_mutation
chrIV	192451	G	A	silent_mutation
chrIV	192839	C	T	synonymous_codon	YDL146W
chrIV	193043	A	G	synonymous_codon	YDL146W
chrIV	193103	C	T	synonymous_codon	YDL146W
chrIV	193107	T	C	conservative_missense_codon	YDL146W
chrIV	193118	A	G	synonymous_codon	YDL146W
chrIV	193121	C	T	synonymous_codon	YDL146W
chrIV	193154	T	C	synonymous_codon	YDL146W
chrIV	193178	C	T	synonymous_codon	YDL146W
chrIV	193214	T	A	synonymous_codon	YDL146W
chrIV	193229	C	T	synonymous_codon	YDL146W
chrIV	193242	T	C	conservative_missense_codon	YDL146W
chrIV	193254	A	G	conservative_missense_codon	YDL146W
chrIV	193364	G	A	synonymous_codon	YDL146W
chrIV	193567	G	A	conservative_missense_codon	YDL146W
chrIV	193568	G	A	conservative_missense_codon	YDL146W
chrIV	193583	T	C	synonymous_codon	YDL146W
chrIV	193595	A	G	synonymous_codon	YDL146W
chrIV	193723	G	A	conservative_missense_codon	YDL146W
chrIV	194241	T	C	silent_mutation
chrIV	194317	A	G	silent_mutation
chrIV	195095	C	T	conservative_missense_codon	YDL145C
chrIV	195098	C	T	conservative_missense_codon	YDL145C
chrIV	195160	G	A	conservative_missense_codon	YDL145C
chrIV	195463	A	G	conservative_missense_codon	YDL145C
chrIV	195920	A	G	conservative_missense_codon	YDL145C
chrIV	196014	A	G	synonymous_codon	YDL145C
chrIV	196443	C	T	synonymous_codon	YDL145C
chrIV	196806	T	C	synonymous_codon	YDL145C
chrIV	196851	A	G	synonymous_codon	YDL145C
chrIV	197574	G	A	synonymous_codon	YDL145C
chrIV	197883	G	C	synonymous_codon	YDL145C
chrIV	198659	G	A	silent_mutation
chrIV	198685	T	C	conservative_missense_codon	YDL144C
chrIV	198734	T	C	synonymous_codon	YDL144C
chrIV	198778	C	T	conservative_missense_codon	YDL144C
chrIV	198878	C	T	synonymous_codon	YDL144C
chrIV	199316	T	C	synonymous_codon	YDL144C
chrIV	199393	G	A	conservative_missense_codon	YDL144C
chrIV	199738	A	G	silent_mutation
chrIV	200151	T	C	synonymous_codon	YDL143W
chrIV	200193	A	G	synonymous_codon	YDL143W
chrIV	200220	C	T	synonymous_codon	YDL143W
chrIV	201039	T	C	synonymous_codon	YDL143W
chrIV	201393	C	T	synonymous_codon	YDL143W
chrIV	217109	C	T	silent_mutation
chrIV	217342	G	A	silent_mutation
chrIV	217405	C	T	silent_mutation
chrIV	217447	G	A	silent_mutation
chrIV	217557	G	A	silent_mutation
chrIV	217691	T	C	silent_mutation
chrIV	218010	C	T	synonymous_codon	YDL136W
chrIV	296083	G	A	conservative_missense_codon	YDL090C
chrIV	304248	C	T	synonymous_codon	YDL085W
chrIV	304677	C	T	synonymous_codon	YDL085W
chrIV	305375	A	G	conservative_missense_codon	YDL084W
chrIV	305599	G	T	synonymous_codon	YDL084W
chrIV	356562	C	T	synonymous_codon	YDL055C
chrIV	356766	A	G	silent_mutation
chrIV	356951	T	G	silent_mutation
chrIV	356965	A	G	silent_mutation
chrIV	357038	G	C	silent_mutation
chrIV	357070	C	T	silent_mutation
chrIV	357312	T	C	silent_mutation
chrIV	357529	C	T	silent_mutation
chrIV	357632	A	C	silent_mutation
chrIV	357787	A	G	silent_mutation
chrIV	357802	C	T	silent_mutation
chrIV	358050	G	A	silent_mutation
chrIV	358197	C	T	silent_mutation
chrIV	358230	T	A	silent_mutation
chrIV	358243	T	C	silent_mutation
chrIV	358273	A	G	silent_mutation
chrIV	358299	T	C	silent_mutation
chrIV	358380	C	A	silent_mutation
chrIV	358389	C	T	silent_mutation
chrIV	358431	G	A	silent_mutation
chrIV	358561	A	T	silent_mutation
chrIV	358643	G	T	silent_mutation
chrIV	358690	G	T	silent_mutation
chrIV	358707	T	G	silent_mutation
chrIV	358755	A	G	silent_mutation
chrIV	358884	A	C	silent_mutation
chrIV	358932	A	G	silent_mutation
chrIV	358989	T	A	silent_mutation
chrIV	359007	C	T	silent_mutation
chrIV	359028	A	G	silent_mutation
chrIV	359069	T	C	silent_mutation
chrIV	364735	G	A	conservative_missense_codon	YDL051W
chrIV	364735	G	A	non_conservative_missense_codon	YDL050C
chrIV	364913	G	T	silent_mutation
chrIV	365027	G	A	silent_mutation
chrIV	365740	T	C	synonymous_codon	YDL049C
chrIV	365821	A	G	synonymous_codon	YDL049C
chrIV	365897	T	A	silent_mutation
chrIV	366283	G	A	silent_mutation
chrIV	366354	C	A	silent_mutation
chrIV	366413	C	T	silent_mutation
chrIV	366464	C	T	silent_mutation
chrIV	366543	C	T	silent_mutation
chrIV	366862	C	T	synonymous_codon	YDL048C
chrIV	367162	G	A	synonymous_codon	YDL048C
chrIV	367213	T	C	synonymous_codon	YDL048C
chrIV	367336	A	G	synonymous_codon	YDL048C
chrIV	367564	G	C	synonymous_codon	YDL048C
chrIV	367618	G	A	synonymous_codon	YDL048C
chrIV	368193	A	C	conservative_missense_codon	YDL048C
chrIV	368207	A	G	conservative_missense_codon	YDL048C
chrIV	368276	C	T	silent_mutation
chrIV	368402	G	A	silent_mutation
chrIV	368735	G	A	silent_mutation
chrIV	368972	G	A	silent_mutation
chrIV	369194	C	T	silent_mutation
chrIV	369366	C	A	silent_mutation
chrIV	369451	G	A	silent_mutation
chrIV	375239	A	G	synonymous_codon	YDL044C
chrIV	375282	C	T	conservative_missense_codon	YDL044C
chrIV	375335	C	T	silent_mutation
chrIV	375384	T	A	silent_mutation
chrIV	375458	A	G	silent_mutation
chrIV	375530	T	C	silent_mutation
chrIV	375533	A	C	silent_mutation
chrIV	375542	G	T	silent_mutation
chrIV	375611	G	A	silent_mutation
chrIV	375690	G	C	conservative_missense_codon	YDL043C
chrIV	375773	T	C	synonymous_codon	YDL043C
chrIV	375776	T	C	synonymous_codon	YDL043C
chrIV	375826	A	T	conservative_missense_codon	YDL043C
chrIV	375932	T	G	synonymous_codon	YDL043C
chrIV	376661	T	A	silent_mutation
chrIV	376867	T	C	conservative_missense_codon	YDL042C
chrIV	377176	T	C	conservative_missense_codon	YDL042C
chrIV	377306	G	A	synonymous_codon	YDL042C
chrIV	377486	T	G	conservative_missense_codon	YDL042C
chrIV	377936	C	T	synonymous_codon	YDL042C
chrIV	378086	T	C	synonymous_codon	YDL042C
chrIV	378253	G	T	conservative_missense_codon	YDL042C
chrIV	378253	G	T	non_conservative_missense_codon	YDL041W
chrIV	378371	T	C	synonymous_codon	YDL042C, YDL041W
chrIV	378517	A	T	silent_mutation
chrIV	378761	T	G	silent_mutation
chrIV	378788	G	A	silent_mutation
chrIV	378801	C	T	silent_mutation
chrIV	379094	G	A	non_conservative_missense_codon	YDL040C
chrIV	379354	G	A	synonymous_codon	YDL040C
chrIV	379372	G	A	synonymous_codon	YDL040C
chrIV	379570	T	C	synonymous_codon	YDL040C
chrIV	379603	T	A	synonymous_codon	YDL040C
chrIV	379882	G	A	synonymous_codon	YDL040C
chrIV	380035	G	A	synonymous_codon	YDL040C
chrIV	380086	A	G	synonymous_codon	YDL040C
chrIV	380427	C	T	conservative_missense_codon	YDL040C
chrIV	380580	T	C	conservative_missense_codon	YDL040C
chrIV	380668	C	T	synonymous_codon	YDL040C
chrIV	381268	C	T	synonymous_codon	YDL040C
chrIV	381346	G	A	synonymous_codon	YDL040C
chrIV	381481	A	G	silent_mutation
chrIV	381576	T	C	silent_mutation
chrIV	381750	C	T	silent_mutation
chrIV	381770	C	T	silent_mutation
chrIV	382023	C	T	conservative_missense_codon	YDL039C
chrIV	382229	T	C	conservative_missense_codon	YDL039C
chrIV	382330	C	T	conservative_missense_codon	YDL039C
chrIV	382372	C	T	synonymous_codon	YDL039C
chrIV	382396	A	G	synonymous_codon	YDL039C
chrIV	382422	C	T	conservative_missense_codon	YDL039C
chrIV	382655	T	C	conservative_missense_codon	YDL039C
chrIV	382830	C	T	non_conservative_missense_codon	YDL039C
chrIV	383033	A	G	conservative_missense_codon	YDL039C
chrIV	383038	T	G	synonymous_codon	YDL039C
chrIV	383065	G	A	synonymous_codon	YDL039C
chrIV	383227	C	T	conservative_missense_codon	YDL039C
chrIV	383229	C	T	conservative_missense_codon	YDL039C
chrIV	383274	T	A	non_conservative_missense_codon	YDL039C
chrIV	383367	A	G	conservative_missense_codon	YDL039C
chrIV	383382	T	C	conservative_missense_codon	YDL039C
chrIV	383386	G	A	synonymous_codon	YDL039C
chrIV	383395	G	A	synonymous_codon	YDL039C
chrIV	383425	T	A	synonymous_codon	YDL039C
chrIV	383443	G	A	synonymous_codon	YDL039C
chrIV	384256	A	G	silent_mutation
chrIV	384257	T	C	silent_mutation
chrIV	384275	G	A	silent_mutation
chrIV	384299	C	A	silent_mutation
chrIV	384355	A	G	silent_mutation
chrIV	384370	G	A	silent_mutation
chrIV	384378	G	A	silent_mutation
chrIV	384407	G	C	silent_mutation
chrIV	384415	A	G	silent_mutation
chrIV	384429	A	C	silent_mutation
chrIV	384431	C	A	silent_mutation
chrIV	384432	T	C	silent_mutation
chrIV	384434	A	T	silent_mutation
chrIV	384435	C	T	silent_mutation
chrIV	384436	T	A	silent_mutation
chrIV	384437	A	C	silent_mutation
chrIV	384439	A	T	silent_mutation
chrIV	384442	A	G	silent_mutation
chrIV	384451	G	A	silent_mutation
chrIV	384454	A	T	silent_mutation
chrIV	384455	A	G	silent_mutation
chrIV	384456	C	T	silent_mutation
chrIV	384460	A	T	silent_mutation
chrIV	384514	A	G	silent_mutation
chrIV	384518	T	G	silent_mutation
chrIV	384521	G	A	silent_mutation
chrIV	384523	G	A	silent_mutation
chrIV	384524	T	A	silent_mutation
chrIV	384526	A	G	silent_mutation
chrIV	384527	A	G	silent_mutation
chrIV	384529	T	C	silent_mutation
chrIV	384540	G	A	silent_mutation
chrIV	384541	G	A	silent_mutation
chrIV	384548	G	A	silent_mutation
chrIV	384568	A	G	silent_mutation
chrIV	384581	T	G	silent_mutation
chrIV	384595	T	G	silent_mutation
chrIV	384602	T	G	stop_lost	YDL037C
chrIV	384607	G	A	synonymous_codon	YDL037C
chrIV	384703	A	G	synonymous_codon	YDL037C
chrIV	384757	G	A	synonymous_codon	YDL037C
chrIV	384792	A	C	conservative_missense_codon	YDL037C
chrIV	385114	T	C	synonymous_codon	YDL037C
chrIV	385243	T	C	synonymous_codon	YDL037C
chrIV	385363	T	G	synonymous_codon	YDL037C
chrIV	385396	C	G	conservative_missense_codon	YDL037C
chrIV	385411	G	A	synonymous_codon	YDL037C
chrIV	385506	T	C	conservative_missense_codon	YDL037C
chrIV	385531	G	A	synonymous_codon	YDL037C
chrIV	385579	T	C	synonymous_codon	YDL037C
chrIV	385588	G	A	silent_mutation
chrIV	385750	T	C	silent_mutation
chrIV	385790	G	A	silent_mutation
chrIV	385792	G	A	silent_mutation
chrIV	385898	T	A	silent_mutation
chrIV	385913	G	A	silent_mutation
chrIV	385919	G	A	silent_mutation
chrIV	385922	A	T	silent_mutation
chrIV	385961	G	A	silent_mutation
chrIV	385989	C	G	silent_mutation
chrIV	386001	A	G	silent_mutation
chrIV	386025	C	T	silent_mutation
chrIV	386031	G	T	silent_mutation
chrIV	386095	T	C	silent_mutation
chrIV	386116	T	G	silent_mutation
chrIV	386131	C	T	silent_mutation
chrIV	386132	C	G	silent_mutation
chrIV	386135	T	C	silent_mutation
chrIV	386136	T	C	silent_mutation
chrIV	386141	G	A	silent_mutation
chrIV	386149	G	A	silent_mutation
chrIV	386155	A	C	silent_mutation
chrIV	386164	A	G	silent_mutation
chrIV	386165	G	A	silent_mutation
chrIV	386167	A	G	silent_mutation
chrIV	386168	G	A	silent_mutation
chrIV	386169	G	A	silent_mutation
chrIV	386380	G	C	silent_mutation
chrIV	386402	G	A	silent_mutation
chrIV	386438	A	C	silent_mutation
chrIV	386441	C	G	silent_mutation
chrIV	386445	A	G	silent_mutation
chrIV	386446	G	A	silent_mutation
chrIV	386469	T	A	silent_mutation
chrIV	386490	A	G	silent_mutation
chrIV	386499	C	T	silent_mutation
chrIV	386506	G	A	silent_mutation
chrIV	386517	T	A	silent_mutation
chrIV	386523	T	C	silent_mutation
chrIV	386534	C	T	silent_mutation
chrIV	386535	C	T	silent_mutation
chrIV	386613	C	T	silent_mutation
chrIV	386635	G	C	silent_mutation
chrIV	386657	G	A	silent_mutation
chrIV	386702	G	C	silent_mutation
chrIV	386719	A	T	silent_mutation
chrIV	386762	G	A	silent_mutation
chrIV	386776	T	C	silent_mutation
chrIV	386891	A	G	silent_mutation
chrIV	386911	G	T	silent_mutation
chrIV	386946	T	A	silent_mutation
chrIV	386947	T	A	silent_mutation
chrIV	386975	C	G	silent_mutation
chrIV	387000	G	A	silent_mutation
chrIV	387021	T	C	silent_mutation
chrIV	387026	C	A	silent_mutation
chrIV	387041	G	A	silent_mutation
chrIV	387066	T	C	silent_mutation
chrIV	387149	T	C	silent_mutation
chrIV	387157	A	G	silent_mutation
chrIV	387304	A	T	silent_mutation
chrIV	387371	C	T	silent_mutation
chrIV	387713	T	C	conservative_missense_codon	YDL036C
chrIV	387772	A	G	conservative_missense_codon	YDL036C
chrIV	387828	G	A	synonymous_codon	YDL036C
chrIV	388049	C	G	conservative_missense_codon	YDL036C
chrIV	388221	G	T	synonymous_codon	YDL036C
chrIV	388305	A	G	synonymous_codon	YDL036C
chrIV	388338	G	T	synonymous_codon	YDL036C
chrIV	388426	G	C	conservative_missense_codon	YDL036C
chrIV	388449	C	T	synonymous_codon	YDL036C
chrIV	388587	T	C	synonymous_codon	YDL036C
chrIV	388815	A	G	synonymous_codon	YDL036C
chrIV	388871	A	G	conservative_missense_codon	YDL036C
chrIV	388942	A	T	silent_mutation
chrIV	389012	A	T	silent_mutation
chrIV	389045	G	A	silent_mutation
chrIV	389375	T	G	conservative_missense_codon	YDL035C
chrIV	390027	C	A	synonymous_codon	YDL035C
chrIV	390097	G	A	conservative_missense_codon	YDL035C
chrIV	390111	T	C	conservative_missense_codon	YDL035C
chrIV	390120	A	T	conservative_missense_codon	YDL035C
chrIV	390447	G	A	synonymous_codon	YDL035C
chrIV	390560	C	T	conservative_missense_codon	YDL035C
chrIV	390563	C	T	conservative_missense_codon	YDL035C
chrIV	390566	C	T	conservative_missense_codon	YDL035C
chrIV	390684	A	T	synonymous_codon	YDL035C
chrIV	390744	A	G	synonymous_codon	YDL035C
chrIV	390756	T	A	conservative_missense_codon	YDL035C
chrIV	391128	T	C	synonymous_codon	YDL035C
chrIV	391149	G	C	synonymous_codon	YDL035C
chrIV	391193	T	C	conservative_missense_codon	YDL035C
chrIV	391561	C	T	conservative_missense_codon	YDL035C
chrIV	391712	T	C	conservative_missense_codon	YDL035C
chrIV	392799	C	T	conservative_missense_codon	YDL033C
chrIV	392938	C	A	conservative_missense_codon	YDL033C
chrIV	395767	A	T	synonymous_codon	YDL031W
chrIV	396458	A	G	conservative_missense_codon	YDL031W
chrIV	396610	C	A	conservative_missense_codon	YDL031W
chrIV	396700	A	G	synonymous_codon	YDL031W
chrIV	397411	A	G	silent_mutation
chrIV	398408	C	G	conservative_missense_codon	YDL030W
chrIV	398523	T	G	conservative_missense_codon	YDL030W
chrIV	398799	T	C	synonymous_codon	YDL030W
chrIV	399193	A	G	silent_mutation
chrIV	399202	C	T	silent_mutation
chrIV	399570	A	G	synonymous_codon	YDL029W
chrIV	400197	A	G	synonymous_codon	YDL029W
chrIV	400242	A	T	synonymous_codon	YDL029W
chrIV	400290	C	T	synonymous_codon	YDL029W
chrIV	400395	G	A	synonymous_codon	YDL029W
chrIV	400404	G	C	synonymous_codon	YDL029W
chrIV	400491	T	C	synonymous_codon	YDL029W
chrIV	400709	T	A	silent_mutation
chrIV	401117	A	G	synonymous_codon	YDL028C
chrIV	401696	G	A	synonymous_codon	YDL028C
chrIV	401726	A	G	synonymous_codon	YDL028C
chrIV	402050	T	C	synonymous_codon	YDL028C
chrIV	402371	A	G	synonymous_codon	YDL028C
chrIV	402402	T	G	conservative_missense_codon	YDL028C
chrIV	402856	C	A	conservative_missense_codon	YDL028C
chrIV	403331	A	G	silent_mutation
chrIV	403346	A	G	silent_mutation
chrIV	403347	A	G	silent_mutation
chrIV	403449	T	C	silent_mutation
chrIV	403476	A	G	silent_mutation
chrIV	403543	T	A	silent_mutation
chrIV	403544	G	A	silent_mutation
chrIV	403580	A	G	silent_mutation
chrIV	403679	A	G	silent_mutation
chrIV	403830	A	G	synonymous_codon	YDL027C
chrIV	403952	T	C	conservative_missense_codon	YDL027C
chrIV	404304	C	T	synonymous_codon	YDL027C
chrIV	404459	A	T	conservative_missense_codon	YDL027C
chrIV	404690	A	G	conservative_missense_codon	YDL027C
chrIV	404702	T	C	conservative_missense_codon	YDL027C
chrIV	404730	A	C	synonymous_codon	YDL027C
chrIV	404818	G	A	conservative_missense_codon	YDL026W
chrIV	404818	G	A	non_conservative_missense_codon	YDL027C
chrIV	404941	A	G	conservative_missense_codon	YDL027C, YDL026W
chrIV	404996	T	C	conservative_missense_codon	YDL026W
chrIV	405116	C	A	silent_mutation
chrIV	405143	A	G	silent_mutation
chrIV	405482	A	G	conservative_missense_codon	YDL025W-A
chrIV	405482	A	G	synonymous_codon	YDL025C
chrIV	405794	A	G	synonymous_codon	YDL025C
chrIV	405797	C	T	synonymous_codon	YDL025C
chrIV	405938	A	G	synonymous_codon	YDL025C
chrIV	406099	C	T	conservative_missense_codon	YDL025C
chrIV	406118	C	T	synonymous_codon	YDL025C
chrIV	406151	C	T	synonymous_codon	YDL025C
chrIV	406262	T	C	synonymous_codon	YDL025C
chrIV	406301	A	G	synonymous_codon	YDL025C
chrIV	406385	C	T	synonymous_codon	YDL025C
chrIV	406667	T	C	synonymous_codon	YDL025C
chrIV	406814	T	C	synonymous_codon	YDL025C
chrIV	406901	A	T	synonymous_codon	YDL025C
chrIV	407050	A	G	conservative_missense_codon	YDL025C
chrIV	407223	G	C	silent_mutation
chrIV	407286	C	G	silent_mutation
chrIV	408038	C	T	silent_mutation
chrIV	408065	T	C	silent_mutation
chrIV	408095	T	A	silent_mutation
chrIV	408128	T	A	silent_mutation
chrIV	408131	C	T	silent_mutation
chrIV	408221	A	G	silent_mutation
chrIV	408374	C	T	silent_mutation
chrIV	408416	T	A	silent_mutation
chrIV	408706	T	C	synonymous_codon	YDL024C
chrIV	408757	A	G	synonymous_codon	YDL024C
chrIV	408811	A	T	conservative_missense_codon	YDL024C
chrIV	408812	G	A	conservative_missense_codon	YDL024C
chrIV	408877	G	A	synonymous_codon	YDL024C
chrIV	408894	T	G	conservative_missense_codon	YDL024C
chrIV	410728	C	T	silent_mutation
chrIV	411048	C	T	silent_mutation
chrIV	411189	G	C	silent_mutation
chrIV	411448	G	T	silent_mutation
chrIV	411544	T	C	silent_mutation
chrIV	411666	T	C	silent_mutation
chrIV	412382	C	T	synonymous_codon	YDL022W
chrIV	412388	C	T	synonymous_codon	YDL022W
chrIV	422542	A	G	silent_mutation
chrIV	435518	A	T	silent_mutation
chrIV	435680	T	C	silent_mutation
chrIV	435820	A	G	silent_mutation
chrIV	435908	G	A	silent_mutation
chrIV	435990	A	G	silent_mutation
chrIV	435991	T	G	silent_mutation
chrIV	436011	G	A	silent_mutation
chrIV	436026	T	C	silent_mutation
chrIV	436162	A	C	silent_mutation
chrIV	436177	C	T	silent_mutation
chrIV	436257	G	A	silent_mutation
chrIV	436270	G	C	silent_mutation
chrIV	436307	C	A	silent_mutation
chrIV	436308	G	T	silent_mutation
chrIV	436309	A	G	silent_mutation
chrIV	436314	A	G	silent_mutation
chrIV	436482	T	A	silent_mutation
chrIV	436543	C	T	silent_mutation
chrIV	436565	T	C	silent_mutation
chrIV	436884	C	T	silent_mutation
chrIV	436994	T	C	silent_mutation
chrIV	437035	C	A	silent_mutation
chrIV	437054	G	T	silent_mutation
chrIV	437065	A	T	silent_mutation
chrIV	437081	T	C	silent_mutation
chrIV	437130	A	G	silent_mutation
chrIV	456463	G	A	synonymous_codon	YDR004W
chrIV	462088	G	T	stop_gained	YDR007W
chrIV	531628	A	G	synonymous_codon	YDR039C
chrIV	538279	C	T	synonymous_codon	YDR040C
chrIV	538282	G	A	synonymous_codon	YDR040C
chrIV	538285	A	G	synonymous_codon	YDR040C
chrIV	538294	A	G	synonymous_codon	YDR040C
chrIV	538297	G	A	synonymous_codon	YDR040C
chrIV	538318	A	T	synonymous_codon	YDR040C
chrIV	538326	T	C	conservative_missense_codon	YDR040C
chrIV	538332	A	G	synonymous_codon	YDR040C
chrIV	538337	T	C	conservative_missense_codon	YDR040C
chrIV	538341	C	G	conservative_missense_codon	YDR040C
chrIV	538343	A	G	non_conservative_missense_codon	YDR040C
chrIV	538354	G	A	synonymous_codon	YDR040C
chrIV	538357	C	A	synonymous_codon	YDR040C
chrIV	538359	A	G	synonymous_codon	YDR040C
chrIV	538369	T	C	synonymous_codon	YDR040C
chrIV	538384	G	A	synonymous_codon	YDR040C
chrIV	538404	C	T	conservative_missense_codon	YDR040C
chrIV	572235	T	C	synonymous_codon	YDR060W
chrIV	637663	A	T	conservative_missense_codon	YDR096W
chrIV	638634	G	A	conservative_missense_codon	YDR096W
chrIV	638815	C	T	synonymous_codon	YDR096W
chrIV	641150	C	T	conservative_missense_codon	YDR097C
chrIV	642192	A	C	non_conservative_missense_codon	YDR097C
chrIV	644629	T	A	conservative_missense_codon	YDR098C
chrIV	645268	C	G	silent_mutation
chrIV	645352	C	T	silent_mutation
chrIV	652308	C	A	silent_mutation
chrIV	652808	T	C	silent_mutation
chrIV	653246	T	C	silent_mutation
chrIV	653336	C	T	silent_mutation
chrIV	654943	T	C	silent_mutation
chrIV	657366	G	A	synonymous_codon	YDR101C
chrIV	660979	A	G	conservative_missense_codon	YDR103W
chrIV	662378	T	C	conservative_missense_codon	YDR104C
chrIV	662835	T	C	synonymous_codon	YDR104C
chrIV	664444	T	A	non_conservative_missense_codon	YDR104C
chrIV	664509	A	T	synonymous_codon	YDR104C
chrIV	666471	C	T	synonymous_codon	YDR105C
chrIV	667309	G	A	synonymous_codon	YDR106W
chrIV	667469	A	T	non_conservative_missense_codon	YDR106W
chrIV	672865	A	G	conservative_missense_codon	YDR108W
chrIV	673495	G	A	silent_mutation
chrIV	674519	A	G	synonymous_codon	YDR109C
chrIV	820043	G	A	conservative_missense_codon	YDR179W-A
chrIV	833668	T	G	synonymous_codon	YDR186C
chrIV	880697	A	G	conservative_missense_codon	YDR210C-D
chrIV	975772	G	A	conservative_missense_codon	YDR259C
chrIV	987244	G	A	silent_mutation
chrIV	1047299	G	C	stop_gained	YDR293C
chrIV	1160352	C	T	synonymous_codon	YDR343C
chrIV	1160444	C	T	conservative_missense_codon	YDR343C
chrIV	1229783	G	C	silent_mutation
chrIV	1253397	T	C	synonymous_codon	YDR389W
chrIV	1282718	A	G	conservative_missense_codon	YDR406W
chrIV	1300640	C	T	conservative_missense_codon	YDR416W
chrIV	1307967	T	C	synonymous_codon	YDR420W
chrIV	1341094	A	G	silent_mutation
chrIV	1402305	C	T	non_conservative_missense_codon	YDR471W
chrIV	1433710	A	T	conservative_missense_codon	YDR490C
chrIV	1503947	G	A	synonymous_codon	YDR534C
chrIV	1525313	T	G	conservative_missense_codon	YDR544C
chrIV	1525335	C	G	conservative_missense_codon	YDR544C
chrIV	1525340	C	A	conservative_missense_codon	YDR544C
chrIV	1525345	C	G	conservative_missense_codon	YDR544C
chrIV	1525351	C	G	conservative_missense_codon	YDR544C
chrIV	1525357	C	G	conservative_missense_codon	YDR544C
chrIV	1525363	C	G	conservative_missense_codon	YDR544C
chrIV	1525366	C	G	conservative_missense_codon	YDR544C
chrIV	1525368	C	G	conservative_missense_codon	YDR544C
chrIV	1525370	C	G	conservative_missense_codon	YDR544C
chrIV	1525394	G	T	conservative_missense_codon	YDR544C
chrIV	1525468	A	G	conservative_missense_codon	YDR544C
chrIV	1525470	A	G	non_conservative_missense_codon	YDR544C
chrIV	1525471	T	G	non_conservative_missense_codon	YDR544C
chrIV	1525472	A	G	non_conservative_missense_codon	YDR544C
chrIV	1525474	A	G	conservative_missense_codon	YDR544C
chrIX	23214	T	G	conservative_missense_codon	YIL169C
chrIX	25418	T	C	conservative_missense_codon	YIL169C
chrIX	138428	G	C	silent_mutation
chrIX	138429	A	C	silent_mutation
chrIX	256304	T	C	synonymous_codon	YIL052C
chrIX	256581	C	T	silent_mutation
chrIX	256673	T	C	silent_mutation
chrIX	256715	T	C	silent_mutation
chrIX	256728	G	T	silent_mutation
chrIX	256751	A	G	silent_mutation
chrIX	256752	G	A	silent_mutation
chrIX	256796	T	C	silent_mutation
chrIX	256885	C	G	silent_mutation
chrIX	256921	G	A	silent_mutation
chrIX	256951	G	A	silent_mutation
chrIX	256984	A	G	silent_mutation
chrIX	257003	C	A	silent_mutation
chrIX	257011	T	C	silent_mutation
chrIX	257018	G	A	silent_mutation
chrIX	257135	G	A	silent_mutation
chrIX	257350	A	G	silent_mutation
chrIX	257381	T	A	silent_mutation
chrIX	257464	T	A	silent_mutation
chrIX	257516	A	G	silent_mutation
chrIX	257521	C	T	silent_mutation
chrIX	257522	G	T	silent_mutation
chrIX	257531	C	T	silent_mutation
chrIX	257534	C	A	silent_mutation
chrIX	257575	T	G	silent_mutation
chrIX	257638	C	T	silent_mutation
chrIX	257809	A	G	silent_mutation
chrIX	257823	A	G	silent_mutation
chrIX	257945	T	C	synonymous_codon	YIL051C
chrIX	258854	T	A	silent_mutation
chrIX	259266	C	T	synonymous_codon	YIL050W
chrIX	259323	T	A	conservative_missense_codon	YIL050W
chrIX	259784	A	G	silent_mutation
chrIX	259788	T	C	silent_mutation
chrIX	259858	T	C	silent_mutation
chrIX	259859	C	T	silent_mutation
chrIX	260067	G	A	silent_mutation
chrIX	260120	G	A	silent_mutation
chrIX	260167	G	A	conservative_missense_codon	YIL049W
chrIX	260232	C	T	synonymous_codon	YIL049W
chrIX	260247	A	C	synonymous_codon	YIL049W
chrIX	260320	A	G	conservative_missense_codon	YIL049W
chrIX	260331	A	G	synonymous_codon	YIL049W
chrIX	260350	C	T	conservative_missense_codon	YIL049W
chrIX	260376	C	T	synonymous_codon	YIL049W
chrIX	260388	C	T	synonymous_codon	YIL049W
chrIX	260414	T	A	conservative_missense_codon	YIL049W
chrIX	260488	C	T	synonymous_codon	YIL049W
chrIX	260934	G	A	silent_mutation
chrIX	261061	C	T	silent_mutation
chrIX	261197	T	A	silent_mutation
chrIX	261261	G	A	silent_mutation
chrIX	261499	A	G	synonymous_codon	YIL048W
chrIX	262441	T	C	synonymous_codon	YIL048W
chrIX	262672	C	T	synonymous_codon	YIL048W
chrIX	263632	C	T	synonymous_codon	YIL048W
chrIX	263719	G	A	synonymous_codon	YIL048W
chrIX	264571	A	G	synonymous_codon	YIL048W
[truncated: 7,477 more rows]

## Sheet: summary_variant_type
silent_mutation	3875
synonymous_codon	3432
conservative_missense_codon	1816
non_conservative_missense_codon	328
stop_gained	19
stop_lost	6
total	9476

## Sheet: #_variant_type_gene
Row Labels	Count of Variant Type
Q0065, Q0070, Q0045
conservative_missense_codon	1
Q0065, Q0070, Q0045 Total	1
Q0085
conservative_missense_codon	10
Q0085 Total	10
Q0085
stop_gained	1
synonymous_codon	9
Q0085 Total	10
Q0092
conservative_missense_codon	1
Q0092 Total	1
Q0115
non_conservative_missense_codon	1
Q0115 Total	1
Q0140
conservative_missense_codon	1
Q0140 Total	1
YAL004W
conservative_missense_codon	1
non_conservative_missense_codon	1
YAL004W Total	2
YAL005C
synonymous_codon	2
YAL005C Total	2
YAL063C
conservative_missense_codon	10
non_conservative_missense_codon	2
YAL063C Total	12
YAL063C
synonymous_codon	3
YAL063C Total	3
YAR002W
conservative_missense_codon	1
YAR002W Total	1
YAR009C
conservative_missense_codon	1
YAR009C Total	1
YAR042W
conservative_missense_codon	1
YAR042W Total	1
YAR042W
synonymous_codon	1
YAR042W Total	1
YBL005W-A,YBL005W-B
non_conservative_missense_codon	2
YBL005W-A,YBL005W-B Total	2
YBL005W-B
synonymous_codon	1
YBL005W-B Total	1
YBL015W
synonymous_codon	1
YBL015W Total	1
YBL016W
synonymous_codon	2
YBL016W Total	2
YBL017C
conservative_missense_codon	14
YBL017C Total	14
YBL017C
synonymous_codon	14
YBL017C Total	14
YBL019W
conservative_missense_codon	3
YBL019W Total	3
YBL020W
synonymous_codon	6
YBL020W Total	6
YBL021C
synonymous_codon	1
YBL021C Total	1
YBL022C
conservative_missense_codon	2
YBL022C Total	2
YBL022C
synonymous_codon	15
YBL022C Total	15
YBL023C
conservative_missense_codon	1
YBL023C Total	1
YBL023C
synonymous_codon	8
YBL023C Total	8
YBL024W
conservative_missense_codon	3
YBL024W Total	3
YBL024W
synonymous_codon	2
YBL024W Total	2
YBL025W
conservative_missense_codon	1
YBL025W Total	1
YBL025W
synonymous_codon	2
YBL025W Total	2
YBL026W
synonymous_codon	2
YBL026W Total	2
YBL028C
synonymous_codon	4
YBL028C Total	4
YBL029W
conservative_missense_codon	1
non_conservative_missense_codon	1
YBL029W Total	2
YBL029W
synonymous_codon	6
YBL029W Total	6
YBL030C
synonymous_codon	4
YBL030C Total	4
YBL031W
conservative_missense_codon	4
YBL031W Total	4
YBL031W
synonymous_codon	2
YBL031W Total	2
YBL032W
conservative_missense_codon	2
YBL032W Total	2
YBL032W
synonymous_codon	2
YBL032W Total	2
YBL033C
synonymous_codon	11
YBL033C Total	11
YBL034C
conservative_missense_codon	4
YBL034C Total	4
YBL034C
synonymous_codon	5
YBL034C Total	5
YBL037W
stop_gained	1
YBL037W Total	1
YBL100W-A
synonymous_codon	4
YBL100W-A Total	4
YBL100W-A,YBL100W-B
conservative_missense_codon	5
YBL100W-A,YBL100W-B Total	5
YBL100W-B
conservative_missense_codon	2
YBL100W-B Total	2
YBL100W-B
synonymous_codon	1
YBL100W-B Total	1
YBL105C
conservative_missense_codon	1
YBL105C Total	1
YBL105C
synonymous_codon	4
YBL105C Total	4
YBR008C
conservative_missense_codon	6
YBR008C Total	6
YBR008C
synonymous_codon	6
YBR008C Total	6
YBR009C
synonymous_codon	1
YBR009C Total	1
YBR011C
conservative_missense_codon	1
YBR011C Total	1
YBR011C
synonymous_codon	3
YBR011C Total	3
YBR014C
conservative_missense_codon	1
YBR014C Total	1
YBR014C
synonymous_codon	2
YBR014C Total	2
YBR015C
conservative_missense_codon	1
YBR015C Total	1
YBR015C
synonymous_codon	10
YBR015C Total	10
YBR016W
synonymous_codon	1
YBR016W Total	1
YBR017C
synonymous_codon	2
YBR017C Total	2
YBR030W
conservative_missense_codon	6
YBR030W Total	6
YBR030W
synonymous_codon	6
YBR030W Total	6
YBR031W
synonymous_codon	3
YBR031W Total	3
YBR094W
conservative_missense_codon	1
YBR094W Total	1
YBR128C
conservative_missense_codon	1
YBR128C Total	1
YBR137W
non_conservative_missense_codon	1
YBR137W Total	1
YBR200W
conservative_missense_codon	1
YBR200W Total	1
YBR200W
synonymous_codon	4
YBR200W Total	4
YBR200W-A
synonymous_codon	1
YBR200W-A Total	1
YBR201C-A
non_conservative_missense_codon	1
YBR201C-A Total	1
YBR201C-A
synonymous_codon	1
YBR201C-A Total	1
YBR201W
conservative_missense_codon	1
YBR201W Total	1
YBR201W
synonymous_codon	5
YBR201W Total	5
YBR202W
conservative_missense_codon	1
YBR202W Total	1
YBR202W
synonymous_codon	13
YBR202W Total	13
YBR203W
conservative_missense_codon	5
YBR203W Total	5
YBR203W
synonymous_codon	12
YBR203W Total	12
YBR205W
synonymous_codon	4
YBR205W Total	4
YBR207W
conservative_missense_codon	1
YBR207W Total	1
YBR207W
synonymous_codon	7
YBR207W Total	7
YBR208C
conservative_missense_codon	9
YBR208C Total	9
YBR208C
synonymous_codon	18
YBR208C Total	18
YBR210W
conservative_missense_codon	1
YBR210W Total	1
YBR210W
synonymous_codon	2
YBR210W Total	2
YBR211C
conservative_missense_codon	2
YBR211C Total	2
YBR211C
synonymous_codon	4
YBR211C Total	4
YBR212W
conservative_missense_codon	2
YBR212W Total	2
YBR212W
synonymous_codon	5
YBR212W Total	5
YBR213W
conservative_missense_codon	2
YBR213W Total	2
YBR213W
synonymous_codon	1
YBR213W Total	1
YBR214W
conservative_missense_codon	1
non_conservative_missense_codon	1
YBR214W Total	2
YBR214W
synonymous_codon	5
YBR214W Total	5
YBR215W
conservative_missense_codon	5
YBR215W Total	5
YBR215W
synonymous_codon	8
YBR215W Total	8
YBR216C
conservative_missense_codon	4
YBR216C Total	4
YBR216C
synonymous_codon	8
YBR216C Total	8
YBR218C
conservative_missense_codon	2
YBR218C Total	2
YBR218C
synonymous_codon	9
YBR218C Total	9
YBR219C, YBR220C
synonymous_codon	1
YBR219C, YBR220C Total	1
YBR220C
synonymous_codon	5
YBR220C Total	5
YBR222C
synonymous_codon	2
YBR222C Total	2
YBR223C
conservative_missense_codon	2
YBR223C Total	2
YBR223C
synonymous_codon	3
YBR223C Total	3
YBR224W
conservative_missense_codon	2
YBR224W Total	2
YBR225W
conservative_missense_codon	3
YBR225W Total	3
YBR225W
synonymous_codon	4
YBR225W Total	4
YBR225W, YBR226C
synonymous_codon	2
YBR225W, YBR226C Total	2
YBR226C
conservative_missense_codon	1
YBR226C Total	1
YBR227C
synonymous_codon	2
YBR227C Total	2
YBR228W
conservative_missense_codon	1
YBR228W Total	1
YBR228W
synonymous_codon	1
YBR228W Total	1
YBR229C
synonymous_codon	5
YBR229C Total	5
YBR230W-A
synonymous_codon	1
YBR230W-A Total	1
YBR231C
conservative_missense_codon	1
YBR231C Total	1
YBR231C
synonymous_codon	2
YBR231C Total	2
YBR232C
synonymous_codon	1
YBR232C Total	1
YBR233W
synonymous_codon	1
YBR233W Total	1
YBR233W, YBR232C
synonymous_codon	1
YBR233W, YBR232C Total	1
YBR233W-A
synonymous_codon	1
YBR233W-A Total	1
YBR234C
conservative_missense_codon	1
YBR234C Total	1
YBR234C
synonymous_codon	3
YBR234C Total	3
YBR235W
non_conservative_missense_codon	1
YBR235W Total	1
YBR235W
synonymous_codon	17
YBR235W Total	17
YBR236C
conservative_missense_codon	1
non_conservative_missense_codon	1
YBR236C Total	2
YBR236C
synonymous_codon	3
YBR236C Total	3
YBR237W
conservative_missense_codon	11
non_conservative_missense_codon	3
YBR237W Total	14
YBR237W
synonymous_codon	7
YBR237W Total	7
YBR238C
conservative_missense_codon	1
YBR238C Total	1
YBR238C
synonymous_codon	6
YBR238C Total	6
YBR239C
conservative_missense_codon	3
YBR239C Total	3
YBR239C
synonymous_codon	4
YBR239C Total	4
YBR240C
synonymous_codon	3
YBR240C Total	3
YBR274W
synonymous_codon	1
YBR274W Total	1
YBR275C
conservative_missense_codon	6
non_conservative_missense_codon	1
YBR275C Total	7
YBR275C
synonymous_codon	17
YBR275C Total	17
YBR276C
conservative_missense_codon	4
non_conservative_missense_codon	2
YBR276C Total	6
YBR276C
synonymous_codon	4
YBR276C Total	4
YBR277C
non_conservative_missense_codon	1
YBR277C Total	1
YBR277C
synonymous_codon	1
YBR277C Total	1
YBR278W
synonymous_codon	2
YBR278W Total	2
YBR278W, YBR277C
synonymous_codon	3
YBR278W, YBR277C Total	3
YBR279W
conservative_missense_codon	1
YBR279W Total	1
YBR279W
synonymous_codon	14
YBR279W Total	14
YBR280C
conservative_missense_codon	1
YBR280C Total	1
YBR280C
synonymous_codon	11
YBR280C Total	11
YBR281C
conservative_missense_codon	2
non_conservative_missense_codon	3
YBR281C Total	5
YBR281C
synonymous_codon	5
YBR281C Total	5
YBR282W
non_conservative_missense_codon	2
YBR282W Total	2
YBR282W
synonymous_codon	1
YBR282W Total	1
YBR283C
synonymous_codon	1
YBR283C Total	1
YCL027W
synonymous_codon	1
YCL027W Total	1
YCL029C
synonymous_codon	1
YCL029C Total	1
YCL036W
conservative_missense_codon	1
YCL036W Total	1
YCL047C
synonymous_codon	1
YCL047C Total	1
YCL067C
synonymous_codon	1
YCL067C Total	1
YCR018C
conservative_missense_codon	1
YCR018C Total	1
YCR024C-A
synonymous_codon	1
YCR024C-A Total	1
YCR024C-B
non_conservative_missense_codon	1
YCR024C-B Total	1
YCR024C-B
synonymous_codon	1
YCR024C-B Total	1
YCR038C
conservative_missense_codon	1
YCR038C Total	1
YCR038C, YCR038W-A
synonymous_codon	1
YCR038C, YCR038W-A Total	1
YCR040W
conservative_missense_codon	1
YCR040W Total	1
YCR081W
conservative_missense_codon	1
YCR081W Total	1
YCR082W
synonymous_codon	1
YCR082W Total	1
YCR083W
synonymous_codon	1
YCR083W Total	1
YCR084C
conservative_missense_codon	2
non_conservative_missense_codon	1
YCR084C Total	3
YCR084C
synonymous_codon	5
YCR084C Total	5
YCR085W
synonymous_codon	1
YCR085W Total	1
YCR086W
synonymous_codon	1
YCR086W Total	1
YCR087C-A
synonymous_codon	3
YCR087C-A Total	3
YCR087W
conservative_missense_codon	2
YCR087W Total	2
YCR087W
stop_gained	1
YCR087W Total	1
YCR088W
conservative_missense_codon	4
non_conservative_missense_codon	1
YCR088W Total	5
YCR088W
synonymous_codon	3
YCR088W Total	3
YCR089W
conservative_missense_codon	1
YCR089W Total	1
YCR089W
synonymous_codon	1
YCR089W Total	1
YCR091W
conservative_missense_codon	2
YCR091W Total	2
YCR092C
conservative_missense_codon	2
YCR092C Total	2
YCR093W
synonymous_codon	1
YCR093W Total	1
YCR097W
conservative_missense_codon	1
YCR097W Total	1
YCR097W-A
conservative_missense_codon	1
YCR097W-A Total	1
YCR098C
conservative_missense_codon	1
YCR098C Total	1
YCR098C
synonymous_codon	7
YCR098C Total	7
YCR100C
conservative_missense_codon	1
YCR100C Total	1
YCR100C
synonymous_codon	1
YCR100C Total	1
YCR101C
synonymous_codon	2
YCR101C Total	2
YCR102C
conservative_missense_codon	1
YCR102C Total	1
YCR102W-A
conservative_missense_codon	1
YCR102W-A Total	1
YCR104W
conservative_missense_codon	1
YCR104W Total	1
YCR106W
conservative_missense_codon	2
YCR106W Total	2
YCR107W
conservative_missense_codon	1
YCR107W Total	1
YCR107W
synonymous_codon	1
YCR107W Total	1
YCR108C
conservative_missense_codon	5
YCR108C Total	5
YCR108C
stop_gained	1
synonymous_codon	2
YCR108C Total	3
YDL022W
synonymous_codon	2
YDL022W Total	2
YDL024C
conservative_missense_codon	3
YDL024C Total	3
YDL024C
synonymous_codon	3
YDL024C Total	3
YDL025C
conservative_missense_codon	2
YDL025C Total	2
YDL025C
synonymous_codon	12
YDL025C Total	12
YDL025W-A
conservative_missense_codon	1
YDL025W-A Total	1
YDL026W
conservative_missense_codon	2
YDL026W Total	2
YDL027C
conservative_missense_codon	4
non_conservative_missense_codon	1
YDL027C Total	5
YDL027C
synonymous_codon	3
YDL027C Total	3
YDL027C, YDL026W
conservative_missense_codon	1
YDL027C, YDL026W Total	1
YDL028C
conservative_missense_codon	2
YDL028C Total	2
YDL028C
synonymous_codon	5
YDL028C Total	5
YDL029W
synonymous_codon	7
YDL029W Total	7
YDL030W
conservative_missense_codon	2
YDL030W Total	2
YDL030W
synonymous_codon	1
YDL030W Total	1
YDL031W
conservative_missense_codon	2
YDL031W Total	2
YDL031W
synonymous_codon	2
YDL031W Total	2
YDL033C
conservative_missense_codon	2
YDL033C Total	2
YDL035C
conservative_missense_codon	11
YDL035C Total	11
YDL035C
synonymous_codon	6
YDL035C Total	6
YDL036C
conservative_missense_codon	5
YDL036C Total	5
YDL036C
synonymous_codon	7
YDL036C Total	7
YDL037C
conservative_missense_codon	3
YDL037C Total	3
YDL037C
stop_lost	1
synonymous_codon	9
YDL037C Total	10
YDL039C
conservative_missense_codon	10
non_conservative_missense_codon	2
YDL039C Total	12
YDL039C
synonymous_codon	8
YDL039C Total	8
YDL040C
conservative_missense_codon	2
non_conservative_missense_codon	1
YDL040C Total	3
YDL040C
synonymous_codon	10
YDL040C Total	10
YDL041W
non_conservative_missense_codon	1
YDL041W Total	1
YDL042C
conservative_missense_codon	4
YDL042C Total	4
YDL042C
synonymous_codon	3
YDL042C Total	3
YDL042C, YDL041W
synonymous_codon	1
YDL042C, YDL041W Total	1
YDL043C
conservative_missense_codon	2
YDL043C Total	2
YDL043C
synonymous_codon	3
YDL043C Total	3
YDL044C
conservative_missense_codon	1
YDL044C Total	1
YDL044C
synonymous_codon	1
YDL044C Total	1
YDL048C
conservative_missense_codon	2
YDL048C Total	2
YDL048C
synonymous_codon	6
YDL048C Total	6
YDL049C
synonymous_codon	2
YDL049C Total	2
YDL050C
non_conservative_missense_codon	1
YDL050C Total	1
YDL051W
conservative_missense_codon	1
YDL051W Total	1
YDL055C
synonymous_codon	1
YDL055C Total	1
YDL084W
conservative_missense_codon	1
YDL084W Total	1
YDL084W
synonymous_codon	1
YDL084W Total	1
YDL085W
synonymous_codon	2
YDL085W Total	2
YDL090C
conservative_missense_codon	1
YDL090C Total	1
YDL136W
synonymous_codon	1
YDL136W Total	1
YDL143W
synonymous_codon	5
YDL143W Total	5
YDL144C
conservative_missense_codon	3
YDL144C Total	3
YDL144C
synonymous_codon	3
YDL144C Total	3
YDL145C
conservative_missense_codon	5
YDL145C Total	5
YDL145C
synonymous_codon	6
YDL145C Total	6
YDL146W
conservative_missense_codon	6
YDL146W Total	6
YDL146W
synonymous_codon	12
YDL146W Total	12
YDL147W
conservative_missense_codon	1
YDL147W Total	1
YDL147W
synonymous_codon	3
YDL147W Total	3
YDL148C
conservative_missense_codon	1
YDL148C Total	1
YDL148C
synonymous_codon	5
YDL148C Total	5
YDL149W
conservative_missense_codon	6
non_conservative_missense_codon	1
YDL149W Total	7
YDL149W
synonymous_codon	17
YDL149W Total	17
YDL150W
conservative_missense_codon	2
YDL150W Total	2
YDL150W
synonymous_codon	4
YDL150W Total	4
YDL151C
non_conservative_missense_codon	1
YDL151C Total	1
YDL151C, YDL150W
conservative_missense_codon	1
synonymous_codon	3
YDL151C, YDL150W Total	4
YDL152W
conservative_missense_codon	1
non_conservative_missense_codon	1
YDL152W Total	2
YDL153C
conservative_missense_codon	6
YDL153C Total	6
YDL153C
synonymous_codon	1
YDL153C Total	1
YDL154W
conservative_missense_codon	14
YDL154W Total	14
YDL154W
synonymous_codon	12
YDL154W Total	12
YDL155W
synonymous_codon	8
YDL155W Total	8
YDL156W
conservative_missense_codon	4
YDL156W Total	4
YDL156W
synonymous_codon	6
YDL156W Total	6
YDL157C
non_conservative_missense_codon	1
YDL157C Total	1
YDL160C
synonymous_codon	4
YDL160C Total	4
YDL161W
conservative_missense_codon	1
YDL161W Total	1
YDL161W
synonymous_codon	2
YDL161W Total	2
YDL164C
conservative_missense_codon	1
YDL164C Total	1
YDL164C
synonymous_codon	9
YDL164C Total	9
YDL165W
synonymous_codon	2
YDL165W Total	2
YDL166C
synonymous_codon	1
YDL166C Total	1
YDL199C
conservative_missense_codon	1
YDL199C Total	1
YDL231C
conservative_missense_codon	1
YDL231C Total	1
YDL231C
synonymous_codon	1
YDL231C Total	1
YDL233W
conservative_missense_codon	1
YDL233W Total	1
YDL233W
synonymous_codon	1
YDL233W Total	1
YDL235C
synonymous_codon	1
YDL235C Total	1
YDL236W
conservative_missense_codon	1
YDL236W Total	1
YDL237W
conservative_missense_codon	1
non_conservative_missense_codon	1
YDL237W Total	2
YDL238C
synonymous_codon	1
YDL238C Total	1
YDL239C
conservative_missense_codon	4
YDL239C Total	4
YDL239C
synonymous_codon	2
YDL239C Total	2
YDL240W
conservative_missense_codon	1
YDL240W Total	1
YDL240W
synonymous_codon	1
YDL240W Total	1
YDL243C
conservative_missense_codon	9
non_conservative_missense_codon	9
YDL243C Total	18
YDL243C
synonymous_codon	30
YDL243C Total	30
YDL247W
synonymous_codon	1
YDL247W Total	1
YDL248W
conservative_missense_codon	15
non_conservative_missense_codon	4
YDL248W Total	19
YDL248W
synonymous_codon	5
YDL248W Total	5
YDR004W
synonymous_codon	1
YDR004W Total	1
YDR007W
stop_gained	1
YDR007W Total	1
YDR039C
synonymous_codon	1
YDR039C Total	1
YDR040C
conservative_missense_codon	4
non_conservative_missense_codon	1
YDR040C Total	5
YDR040C
synonymous_codon	12
YDR040C Total	12
YDR060W
synonymous_codon	1
YDR060W Total	1
YDR096W
conservative_missense_codon	2
YDR096W Total	2
YDR096W
synonymous_codon	1
YDR096W Total	1
YDR097C
conservative_missense_codon	1
non_conservative_missense_codon	1
YDR097C Total	2
YDR098C
conservative_missense_codon	1
YDR098C Total	1
YDR101C
synonymous_codon	1
YDR101C Total	1
YDR103W
conservative_missense_codon	1
YDR103W Total	1
YDR104C
conservative_missense_codon	1
non_conservative_missense_codon	1
YDR104C Total	2
YDR104C
synonymous_codon	2
YDR104C Total	2
YDR105C
synonymous_codon	1
YDR105C Total	1
YDR106W
non_conservative_missense_codon	1
YDR106W Total	1
YDR106W
synonymous_codon	1
YDR106W Total	1
YDR108W
conservative_missense_codon	1
YDR108W Total	1
YDR109C
synonymous_codon	1
YDR109C Total	1
YDR179W-A
conservative_missense_codon	1
YDR179W-A Total	1
YDR186C
synonymous_codon	1
YDR186C Total	1
YDR210C-D
conservative_missense_codon	1
YDR210C-D Total	1
YDR259C
conservative_missense_codon	1
YDR259C Total	1
YDR293C
stop_gained	1
YDR293C Total	1
YDR343C
conservative_missense_codon	1
YDR343C Total	1
YDR343C
synonymous_codon	1
YDR343C Total	1
YDR389W
synonymous_codon	1
YDR389W Total	1
YDR406W
conservative_missense_codon	1
YDR406W Total	1
YDR416W
conservative_missense_codon	1
YDR416W Total	1
YDR420W
synonymous_codon	1
YDR420W Total	1
YDR471W
non_conservative_missense_codon	1
YDR471W Total	1
YDR490C
conservative_missense_codon	1
YDR490C Total	1
YDR534C
synonymous_codon	1
YDR534C Total	1
YDR544C
conservative_missense_codon	13
non_conservative_missense_codon	3
YDR544C Total	16
YEL021W
conservative_missense_codon	1
YEL021W Total	1
YER001W
conservative_missense_codon	1
YER001W Total	1
YER011W
conservative_missense_codon	2
YER011W Total	2
YER012W
synonymous_codon	2
YER012W Total	2
YER013W
synonymous_codon	5
YER013W Total	5
YER014C-A,YER014W
conservative_missense_codon	1
YER014C-A,YER014W Total	1
YER019C-A
synonymous_codon	1
YER019C-A Total	1
YER020W
conservative_missense_codon	5
YER020W Total	5
YER020W
synonymous_codon	16
YER020W Total	16
YER021W
conservative_missense_codon	1
YER021W Total	1
YER021W
synonymous_codon	11
YER021W Total	11
YER022W
conservative_missense_codon	6
YER022W Total	6
YER022W
synonymous_codon	9
YER022W Total	9
YER023W
synonymous_codon	1
YER023W Total	1
YER024W
conservative_missense_codon	4
non_conservative_missense_codon	1
YER024W Total	5
YER024W
synonymous_codon	10
YER024W Total	10
YER025W
synonymous_codon	1
YER025W Total	1
YER069W
non_conservative_missense_codon	1
YER069W Total	1
YER096W
conservative_missense_codon	1
YER096W Total	1
YER118C
conservative_missense_codon	1
YER118C Total	1
YER119C
conservative_missense_codon	1
YER119C Total	1
YER119C
synonymous_codon	2
YER119C Total	2
YER119C-A
conservative_missense_codon	1
YER119C-A Total	1
YER119C-A
synonymous_codon	2
YER119C-A Total	2
YER120W
non_conservative_missense_codon	1
YER120W Total	1
YER120W
synonymous_codon	1
YER120W Total	1
YER121W
conservative_missense_codon	1
YER121W Total	1
YER122C
conservative_missense_codon	2
non_conservative_missense_codon	1
YER122C Total	3
YER122C
synonymous_codon	6
YER122C Total	6
YER123W
non_conservative_missense_codon	1
YER123W Total	1
YER123W
synonymous_codon	2
YER123W Total	2
YER124C
conservative_missense_codon	3
YER124C Total	3
YER124C
synonymous_codon	4
YER124C Total	4
YER125W
synonymous_codon	3
YER125W Total	3
YER126C
synonymous_codon	1
YER126C Total	1
YER127W
conservative_missense_codon	1
non_conservative_missense_codon	2
YER127W Total	3
YER127W
synonymous_codon	4
YER127W Total	4
YER128W
synonymous_codon	1
YER128W Total	1
YER129W
conservative_missense_codon	10
YER129W Total	10
YER129W
synonymous_codon	17
YER129W Total	17
YER130C
conservative_missense_codon	1
non_conservative_missense_codon	1
YER130C Total	2
YER130C
synonymous_codon	5
YER130C Total	5
YER131W
synonymous_codon	1
YER131W Total	1
YER142C
synonymous_codon	1
YER142C Total	1
YER172C
synonymous_codon	1
YER172C Total	1
YFL009W
conservative_missense_codon	1
YFL009W Total	1
YFL023W
conservative_missense_codon	4
non_conservative_missense_codon	1
YFL023W Total	5
YFL023W
synonymous_codon	4
YFL023W Total	4
YFL024C
conservative_missense_codon	2
YFL024C Total	2
YFL024C
synonymous_codon	15
YFL024C Total	15
YFL025C
conservative_missense_codon	3
non_conservative_missense_codon	2
YFL025C Total	5
YFL025C
synonymous_codon	7
YFL025C Total	7
YFL030W
synonymous_codon	6
YFL030W Total	6
YFL062W
synonymous_codon	2
YFL062W Total	2
YFR004W
synonymous_codon	1
YFR004W Total	1
YFR020W
conservative_missense_codon	7
non_conservative_missense_codon	1
YFR020W Total	8
YFR020W
synonymous_codon	2
YFR020W Total	2
YFR021W
conservative_missense_codon	1
YFR021W Total	1
YFR021W
synonymous_codon	4
YFR021W Total	4
YFR024C-A
conservative_missense_codon	1
YFR024C-A Total	1
YFR024C-A
synonymous_codon	6
YFR024C-A Total	6
YFR025C
conservative_missense_codon	4
non_conservative_missense_codon	1
YFR025C Total	5
YFR025C
synonymous_codon	3
YFR025C Total	3
YFR037C
synonymous_codon	1
YFR037C Total	1
YFR038W
conservative_missense_codon	4
YFR038W Total	4
YFR038W
synonymous_codon	11
YFR038W Total	11
YFR039C
conservative_missense_codon	2
YFR039C Total	2
YFR039C
synonymous_codon	1
YFR039C Total	1
YFR042W
conservative_missense_codon	1
non_conservative_missense_codon	1
YFR042W Total	2
YFR042W
synonymous_codon	1
YFR042W Total	1
YFR043C
conservative_missense_codon	2
YFR043C Total	2
YFR043C
synonymous_codon	1
YFR043C Total	1
YFR044C
synonymous_codon	1
YFR044C Total	1
YFR045W
synonymous_codon	1
YFR045W Total	1
YFR054C
conservative_missense_codon	1
YFR054C Total	1
YFR057W
stop_gained	1
YFR057W Total	1
YGL023C
conservative_missense_codon	1
YGL023C Total	1
YGL026C
non_conservative_missense_codon	1
YGL026C Total	1
YGL062W
non_conservative_missense_codon	2
YGL062W Total	2
YGL095C
non_conservative_missense_codon	1
YGL095C Total	1
YGL096W
conservative_missense_codon	4
non_conservative_missense_codon	2
YGL096W Total	6
YGL096W
synonymous_codon	3
YGL096W Total	3
YGL097W
non_conservative_missense_codon	1
YGL097W Total	1
YGL097W
synonymous_codon	3
YGL097W Total	3
YGL099W
conservative_missense_codon	3
YGL099W Total	3
YGL099W
synonymous_codon	1
YGL099W Total	1
YGL100W
conservative_missense_codon	1
YGL100W Total	1
YGL101W
conservative_missense_codon	1
YGL101W Total	1
YGL101W
synonymous_codon	1
YGL101W Total	1
YGL102C
non_conservative_missense_codon	2
YGL102C Total	2
YGL103W
synonymous_codon	2
YGL103W Total	2
YGL104C
synonymous_codon	3
YGL104C Total	3
YGL105W
synonymous_codon	3
YGL105W Total	3
YGL106W
synonymous_codon	1
YGL106W Total	1
YGL107C
conservative_missense_codon	4
non_conservative_missense_codon	1
YGL107C Total	5
YGL107C
synonymous_codon	1
YGL107C Total	1
YGL108C
conservative_missense_codon	1
YGL108C Total	1
YGL109W
conservative_missense_codon	1
YGL109W Total	1
YGL110C
conservative_missense_codon	3
YGL110C Total	3
YGL110C
synonymous_codon	5
YGL110C Total	5
YGL111W
conservative_missense_codon	1
YGL111W Total	1
YGL111W
synonymous_codon	7
YGL111W Total	7
YGL112C
conservative_missense_codon	1
YGL112C Total	1
YGL112C
synonymous_codon	6
YGL112C Total	6
YGL114W
conservative_missense_codon	2
non_conservative_missense_codon	1
YGL114W Total	3
YGL114W
synonymous_codon	1
YGL114W Total	1
YGL116W
conservative_missense_codon	2
YGL116W Total	2
YGL116W
synonymous_codon	1
YGL116W Total	1
YGL117W
conservative_missense_codon	1
YGL117W Total	1
YGL125W
synonymous_codon	1
YGL125W Total	1
YGL160W
synonymous_codon	1
YGL160W Total	1
YGL256W
conservative_missense_codon	1
YGL256W Total	1
YGL256W
synonymous_codon	4
YGL256W Total	4
YGL257C
conservative_missense_codon	1
YGL257C Total	1
YGL257C
synonymous_codon	2
YGL257C Total	2
YGL258W
conservative_missense_codon	5
YGL258W Total	5
YGL258W
synonymous_codon	1
YGL258W Total	1
YGL258W-A
non_conservative_missense_codon	1
YGL258W-A Total	1
YGL258W-A
synonymous_codon	1
YGL258W-A Total	1
YGL259W
conservative_missense_codon	14
non_conservative_missense_codon	7
YGL259W Total	21
YGL259W
synonymous_codon	8
YGL259W Total	8
YGR052W
non_conservative_missense_codon	1
YGR052W Total	1
YGR075C
conservative_missense_codon	1
YGR075C Total	1
YGR087C
conservative_missense_codon	1
non_conservative_missense_codon	1
YGR087C Total	2
YGR087C
synonymous_codon	4
YGR087C Total	4
YGR088W
non_conservative_missense_codon	1
YGR088W Total	1
YGR088W
synonymous_codon	1
YGR088W Total	1
YGR089W
conservative_missense_codon	8
YGR089W Total	8
YGR089W
synonymous_codon	4
YGR089W Total	4
YGR090W
conservative_missense_codon	1
YGR090W Total	1
YGR092W
conservative_missense_codon	1
YGR092W Total	1
YGR094W
conservative_missense_codon	2
YGR094W Total	2
YGR094W
synonymous_codon	7
YGR094W Total	7
YGR095C
synonymous_codon	1
YGR095C Total	1
YGR096W
synonymous_codon	2
YGR096W Total	2
YGR097W
conservative_missense_codon	5
non_conservative_missense_codon	1
YGR097W Total	6
YGR097W
synonymous_codon	19
YGR097W Total	19
YGR098C
conservative_missense_codon	5
YGR098C Total	5
YGR098C
synonymous_codon	3
YGR098C Total	3
YGR099W
conservative_missense_codon	6
non_conservative_missense_codon	1
YGR099W Total	7
YGR099W
synonymous_codon	8
YGR099W Total	8
YGR100W
conservative_missense_codon	1
YGR100W Total	1
YGR100W
synonymous_codon	9
YGR100W Total	9
YGR103W
conservative_missense_codon	1
YGR103W Total	1
YGR104C
conservative_missense_codon	1
YGR104C Total	1
YGR108W
conservative_missense_codon	1
YGR108W Total	1
YGR108W
synonymous_codon	2
YGR108W Total	2
YGR109C
conservative_missense_codon	3
YGR109C Total	3
YGR109C
synonymous_codon	6
YGR109C Total	6
YGR110W
conservative_missense_codon	1
non_conservative_missense_codon	1
YGR110W Total	2
YGR110W
synonymous_codon	6
YGR110W Total	6
YGR111W
conservative_missense_codon	2
YGR111W Total	2
YGR111W
synonymous_codon	4
YGR111W Total	4
YGR115C
synonymous_codon	1
YGR115C Total	1
YGR115C, YGR114C
synonymous_codon	1
YGR115C, YGR114C Total	1
YGR116W
conservative_missense_codon	2
YGR116W Total	2
YGR116W
synonymous_codon	12
YGR116W Total	12
YGR116W, YGR114C
conservative_missense_codon	1
YGR116W, YGR114C Total	1
YGR117C
conservative_missense_codon	4
YGR117C Total	4
YGR117C
synonymous_codon	11
YGR117C Total	11
YGR119C
conservative_missense_codon	3
YGR119C Total	3
YGR119C
synonymous_codon	5
YGR119C Total	5
YGR120C
synonymous_codon	3
YGR120C Total	3
YGR121C
conservative_missense_codon	3
YGR121C Total	3
YGR121C
synonymous_codon	7
YGR121C Total	7
YGR122C-A
conservative_missense_codon	2
YGR122C-A Total	2
YGR122C-A
stop_gained	1
YGR122C-A Total	1
YGR122W
conservative_missense_codon	3
non_conservative_missense_codon	1
YGR122W Total	4
YGR122W
synonymous_codon	13
YGR122W Total	13
YGR125W
non_conservative_missense_codon	1
YGR125W Total	1
YGR125W
synonymous_codon	1
YGR125W Total	1
YGR127W
conservative_missense_codon	2
non_conservative_missense_codon	2
YGR127W Total	4
YGR127W
synonymous_codon	5
YGR127W Total	5
YGR128C
conservative_missense_codon	5
non_conservative_missense_codon	1
YGR128C Total	6
YGR128C
synonymous_codon	12
YGR128C Total	12
YGR129W
conservative_missense_codon	1
YGR129W Total	1
YGR129W
synonymous_codon	4
YGR129W Total	4
YGR130C
conservative_missense_codon	8
YGR130C Total	8
YGR130C
synonymous_codon	8
YGR130C Total	8
YGR131W
synonymous_codon	1
YGR131W Total	1
YGR155W
synonymous_codon	2
YGR155W Total	2
YGR156W
conservative_missense_codon	1
YGR156W Total	1
YGR157W
conservative_missense_codon	1
YGR157W Total	1
YGR157W
synonymous_codon	3
YGR157W Total	3
YGR159C
conservative_missense_codon	2
YGR159C Total	2
YGR160W
conservative_missense_codon	1
non_conservative_missense_codon	1
YGR160W Total	2
YGR160W, YGR159C
conservative_missense_codon	1
YGR160W, YGR159C Total	1
YGR160W,YGR159C
conservative_missense_codon	1
YGR160W,YGR159C Total	1
YGR161C
conservative_missense_codon	1
YGR161C Total	1
YGR161C
synonymous_codon	3
YGR161C Total	3
YGR162W
conservative_missense_codon	5
YGR162W Total	5
YGR163W
synonymous_codon	1
YGR163W Total	1
YGR166W
conservative_missense_codon	6
YGR166W Total	6
YGR166W
synonymous_codon	8
YGR166W Total	8
YGR167W
conservative_missense_codon	5
YGR167W Total	5
YGR168C
synonymous_codon	1
YGR168C Total	1
YGR240C
synonymous_codon	6
YGR240C Total	6
YGR245C
synonymous_codon	1
YGR245C Total	1
YGR246C
conservative_missense_codon	10
non_conservative_missense_codon	1
YGR246C Total	11
YGR246C
synonymous_codon	5
YGR246C Total	5
YGR247W
conservative_missense_codon	2
YGR247W Total	2
YGR247W
synonymous_codon	2
YGR247W Total	2
YGR248W
conservative_missense_codon	3
YGR248W Total	3
YGR248W
synonymous_codon	4
YGR248W Total	4
YGR249W
conservative_missense_codon	3
YGR249W Total	3
YGR249W
synonymous_codon	6
YGR249W Total	6
YGR250C
conservative_missense_codon	1
non_conservative_missense_codon	1
YGR250C Total	2
YGR250C
synonymous_codon	13
YGR250C Total	13
YGR251W
conservative_missense_codon	1
YGR251W Total	1
YGR251W
synonymous_codon	3
YGR251W Total	3
YGR252W
conservative_missense_codon	1
YGR252W Total	1
YGR252W
synonymous_codon	4
YGR252W Total	4
YGR253C
synonymous_codon	1
YGR253C Total	1
YGR254W
synonymous_codon	1
YGR254W Total	1
YGR257C
non_conservative_missense_codon	3
YGR257C Total	3
YGR258C
conservative_missense_codon	2
YGR258C Total	2
YGR258C
synonymous_codon	2
YGR258C Total	2
YGR259C
synonymous_codon	1
YGR259C Total	1
YGR260W
conservative_missense_codon	2
YGR260W Total	2
YGR260W
synonymous_codon	3
YGR260W Total	3
YGR260W, YGR259C
synonymous_codon	3
YGR260W, YGR259C Total	3
YGR261C
conservative_missense_codon	3
YGR261C Total	3
YGR261C
synonymous_codon	10
YGR261C Total	10
YGR262C
synonymous_codon	2
YGR262C Total	2
YGR263C
synonymous_codon	1
YGR263C Total	1
YGR266W
conservative_missense_codon	1
YGR266W Total	1
YGR271W
conservative_missense_codon	1
YGR271W Total	1
YGR279C
synonymous_codon	1
YGR279C Total	1
YHL004W
conservative_missense_codon	1
YHL004W Total	1
YHL005C
non_conservative_missense_codon	1
YHL005C Total	1
YHL005C
synonymous_codon	2
YHL005C Total	2
YHL006C
conservative_missense_codon	1
YHL006C Total	1
YHL006C
synonymous_codon	4
YHL006C Total	4
YHL007C
conservative_missense_codon	4
YHL007C Total	4
YHL007C
synonymous_codon	4
YHL007C Total	4
YHL008C
conservative_missense_codon	72
non_conservative_missense_codon	11
YHL008C Total	83
YHL008C
synonymous_codon	118
YHL008C Total	118
YHL009C
conservative_missense_codon	7
non_conservative_missense_codon	2
YHL009C Total	9
YHL009C
synonymous_codon	3
YHL009C Total	3
YHL010C
conservative_missense_codon	1
YHL010C Total	1
YHL012W
conservative_missense_codon	2
YHL012W Total	2
YHL012W
synonymous_codon	4
YHL012W Total	4
YHL014C
conservative_missense_codon	1
non_conservative_missense_codon	1
YHL014C Total	2
YHL014C
synonymous_codon	7
YHL014C Total	7
YHL015W
synonymous_codon	2
YHL015W Total	2
YHL015W-A
conservative_missense_codon	3
non_conservative_missense_codon	1
YHL015W-A Total	4
YHL015W-A
synonymous_codon	2
YHL015W-A Total	2
YHL016C
conservative_missense_codon	1
non_conservative_missense_codon	1
YHL016C Total	2
YHL016C
synonymous_codon	23
YHL016C Total	23
YHL017W
synonymous_codon	3
YHL017W Total	3
YHL018W
synonymous_codon	1
YHL018W Total	1
YHL026C
conservative_missense_codon	1
YHL026C Total	1
YHL030W
conservative_missense_codon	7
non_conservative_missense_codon	2
YHL030W Total	9
YHL030W
synonymous_codon	14
YHL030W Total	14
YHL030W-A
conservative_missense_codon	1
YHL030W-A Total	1
YHL030W-A
synonymous_codon	1
YHL030W-A Total	1
YHL031C
conservative_missense_codon	1
YHL031C Total	1
YHL031C
synonymous_codon	2
YHL031C Total	2
YHL032C
conservative_missense_codon	4
non_conservative_missense_codon	1
YHL032C Total	5
YHL032C
synonymous_codon	13
YHL032C Total	13
YHL033C
conservative_missense_codon	2
YHL033C Total	2
YHL033C
synonymous_codon	4
YHL033C Total	4
YHL034C
conservative_missense_codon	1
YHL034C Total	1
YHL034C, YHL034W-A
synonymous_codon	1
YHL034C, YHL034W-A Total	1
YHR008C
conservative_missense_codon	1
YHR008C Total	1
YHR008C
synonymous_codon	1
YHR008C Total	1
YHR009C
conservative_missense_codon	5
YHR009C Total	5
YHR009C
synonymous_codon	7
YHR009C Total	7
YHR011W
synonymous_codon	1
YHR011W Total	1
YHR012W
conservative_missense_codon	1
YHR012W Total	1
YHR012W
synonymous_codon	2
YHR012W Total	2
YHR013C
conservative_missense_codon	1
YHR013C Total	1
YHR013C
synonymous_codon	2
YHR013C Total	2
YHR014W
conservative_missense_codon	4
non_conservative_missense_codon	1
YHR014W Total	5
YHR014W
synonymous_codon	1
YHR014W Total	1
YHR015W
conservative_missense_codon	1
YHR015W Total	1
YHR015W
synonymous_codon	2
YHR015W Total	2
YHR017W
conservative_missense_codon	1
non_conservative_missense_codon	1
YHR017W Total	2
YHR017W
synonymous_codon	5
YHR017W Total	5
YHR018C
synonymous_codon	9
YHR018C Total	9
YHR019C
synonymous_codon	8
YHR019C Total	8
YHR020W
conservative_missense_codon	1
YHR020W Total	1
YHR020W
synonymous_codon	12
YHR020W Total	12
YHR021W-A
conservative_missense_codon	4
non_conservative_missense_codon	1
YHR021W-A Total	5
YHR021W-A
synonymous_codon	1
YHR021W-A Total	1
YHR021W-A, YHR022C
synonymous_codon	2
YHR021W-A, YHR022C Total	2
YHR022C
conservative_missense_codon	10
non_conservative_missense_codon	3
YHR022C Total	13
YHR022C
stop_lost	1
synonymous_codon	5
YHR022C Total	6
YHR023W
conservative_missense_codon	8
non_conservative_missense_codon	1
YHR023W Total	9
YHR023W
synonymous_codon	25
YHR023W Total	25
YHR024C
conservative_missense_codon	1
YHR024C Total	1
YHR024C
synonymous_codon	7
YHR024C Total	7
YHR025W
synonymous_codon	3
YHR025W Total	3
YHR026W
synonymous_codon	1
YHR026W Total	1
YHR027C
synonymous_codon	1
YHR027C Total	1
YHR028C
synonymous_codon	1
YHR028C Total	1
YHR065C
synonymous_codon	1
YHR065C Total	1
YHR072W
conservative_missense_codon	1
YHR072W Total	1
YHR073W
conservative_missense_codon	1
YHR073W Total	1
YHR078W
conservative_missense_codon	1
YHR078W Total	1
YHR158C
synonymous_codon	1
YHR158C Total	1
YHR217C
conservative_missense_codon	4
YHR217C Total	4
YHR217C
synonymous_codon	1
YHR217C Total	1
YIL013C
conservative_missense_codon	1
YIL013C Total	1
YIL017C
non_conservative_missense_codon	1
YIL017C Total	1
YIL030C
conservative_missense_codon	1
YIL030C Total	1
YIL043C
conservative_missense_codon	2
YIL043C Total	2
YIL043C
synonymous_codon	4
YIL043C Total	4
YIL044C
conservative_missense_codon	4
YIL044C Total	4
YIL044C
synonymous_codon	5
YIL044C Total	5
YIL045W
conservative_missense_codon	1
non_conservative_missense_codon	2
YIL045W Total	3
YIL045W
synonymous_codon	2
YIL045W Total	2
YIL047C
conservative_missense_codon	4
non_conservative_missense_codon	1
YIL047C Total	5
YIL047C
synonymous_codon	8
YIL047C Total	8
YIL048W
synonymous_codon	6
YIL048W Total	6
YIL049W
conservative_missense_codon	4
YIL049W Total	4
YIL049W
synonymous_codon	6
YIL049W Total	6
YIL050W
conservative_missense_codon	1
[truncated: 2,602 more rows]

## Sheet: nonsyn_gene_list
Systematic Name	# Nonsynonymous Substitutions	Gene Name	Feature Type
YHL008C	83		ORF|Uncharacterized
YNR065C	52		ORF|Uncharacterized
YGL259W	21	YPS5	ORF|Uncharacterized
YKR054C	20	DYN1	ORF|Verified
YDL248W	19	COS7	ORF|Verified
YDL243C	18	AAD4	ORF|Verified
YDR544C	16		ORF|Dubious
YKL014C	16	URB1	ORF|Verified
YNR066C	15		ORF|Uncharacterized
YBL017C	14	PEP1	ORF|Verified
YBR237W	14	PRP5	ORF|Verified
YDL154W	14	MSH5	ORF|Verified
YNR067C	14	DSE4	ORF|Verified
YHR022C	13		ORF|Uncharacterized
YLR263W	13	RED1	ORF|Verified
YMR164C	13	MSS11	ORF|Verified
YAL063C	12	FLO9	ORF|Verified
YDL039C	12	PRM7	ORF|Verified
YLR247C	12	IRC20	ORF|Verified
YDL035C	11	GPR1	ORF|Verified
YGR246C	11	BRF1	ORF|Verified
YLR086W	11	SMC4	ORF|Verified
YML104C	11	MDM1	ORF|Verified
Q0085	10	ATP6	ORF|Verified
YER129W	10	SAK1	ORF|Verified
YKR058W	10	GLG1	ORF|Verified
YBR208C	9	DUR1,2	ORF|Verified
YHL009C	9	YAP3	ORF|Verified
YHL030W	9	ECM29	ORF|Verified
YHR023W	9	MYO1	ORF|Verified
YLR087C	9	CSF1	ORF|Verified
YLR265C	9	NEJ1	ORF|Verified
YLR436C	9	ECM30	ORF|Verified
YMR154C	9	RIM13	ORF|Verified
YMR265C	9		ORF|Uncharacterized
YFR020W	8	CSS2	ORF|Verified
YGR089W	8	NNF2	ORF|Verified
YGR130C	8		ORF|Verified
YKL010C	8	UFD4	ORF|Verified
YKL033W	8	TTI1	ORF|Verified
YKR082W	8	NUP133	ORF|Verified
YLR084C	8	RAX2	ORF|Verified
YLR233C	8	EST1	ORF|Verified
YLR266C	8	PDR8	ORF|Verified
YLR434C	8		ORF|Dubious
YML109W	8	ZDS2	ORF|Verified
YMR128W	8	ECM16	ORF|Verified
YMR317W	8		ORF|Uncharacterized
YNR061C	8		ORF|Verified
YNR069C	8	BSC5	ORF|Verified
YBL100W-B	7		ORF|Dubious
YBR275C	7	RIF1	ORF|Verified
YDL149W	7	ATG9	ORF|Verified
YGR099W	7	TEL2	ORF|Verified
YJR140C	7	HIR3	ORF|Verified
YKL162C	7		ORF|Uncharacterized
YKR023W	7		ORF|Uncharacterized
YLL013C	7	PUF3	ORF|Verified
YMR086W	7	SEG1	ORF|Verified
YNR059W	7	MNT4	ORF|Verified
YNR063W	7		ORF|Uncharacterized
YBR008C	6	FLR1	ORF|Verified
YBR030W	6	RKM3	ORF|Verified
YBR276C	6	PPS1	ORF|Verified
YDL027C	6	MRX9	ORF|Uncharacterized
YDL146W	6	LDB17	ORF|Verified
YDL153C	6	SAS10	ORF|Verified
YER022W	6	SRB4	ORF|Verified
YGL096W	6	TOS8	ORF|Verified
YGR097W	6	ASK10	ORF|Verified
YGR128C	6	UTP8	ORF|Verified
YGR166W	6	TRS65	ORF|Verified
YJL042W	6	MHP1	ORF|Verified
YKL005C	6	BYE1	ORF|Verified
YKL168C	6	KKQ8	ORF|Verified
YKR015C	6		ORF|Uncharacterized
YKR027W	6	BCH2	ORF|Verified
YKR029C	6	SET3	ORF|Verified
YKR031C	6	SPO14	ORF|Verified
YKR064W	6	OAF3	ORF|Verified
YKR067W	6	GPT2	ORF|Verified
YKR079C	6	TRZ1	ORF|Verified
YKR090W	6	PXL1	ORF|Verified
YKR098C	6	UBP11	ORF|Verified
YLL012W	6	YEH1	ORF|Verified
YLR024C	6	UBR2	ORF|Verified
YLR162W	6		ORF|Verified
YLR256W	6	HAP1	ORF|Verified
YMR124W	6	EPO1	ORF|Verified
YMR312W	6	ELP6	ORF|Verified
YNL078W	6	NIS1	ORF|Verified
YNL095C	6		ORF|Uncharacterized
YNL242W	6	ATG2	ORF|Verified
YNL283C	6	WSC2	ORF|Verified
YNR064C	6		ORF|Verified
YOL151W	6	GRE2	ORF|Verified
YBL100W-A	5		ORF|Dubious
YBR203W	5	COS111	ORF|Verified
YBR215W	5	HPC2	ORF|Verified
YBR281C	5	DUG2	ORF|Verified
YCR088W	5	ABP1	ORF|Verified
YCR108C	5		ORF|Uncharacterized
YDL036C	5	PUS9	ORF|Verified
YDL145C	5	COP1	ORF|Verified
YDR040C	5	ENA1	ORF|Verified
YER020W	5	GPA2	ORF|Verified
YER024W	5	YAT2	ORF|Verified
YFL023W	5	BUD27	ORF|Verified
YFL025C	5	BST1	ORF|Verified
YFR025C	5	HIS2	ORF|Verified
YGL107C	5	RMD9	ORF|Verified
YGL258W	5	VEL1	ORF|Verified
YGR098C	5	ESP1	ORF|Verified
YGR162W	5	TIF4631	ORF|Verified
YGR167W	5	CLC1	ORF|Verified
YHL032C	5	GUT1	ORF|Verified
YHR009C	5	TDA3	ORF|Verified
YHR014W	5	SPO13	ORF|Verified
YHR021W-A	5	ECM12	ORF|Uncharacterized
YIL047C	5	SYG1	ORF|Verified
YJR137C	5	MET5	ORF|Verified
YKL163W	5	PIR3	ORF|Verified
YKR021W	5	ALY1	ORF|Verified
YKR056W	5	TRM2	ORF|Verified
YLL003W	5	SFI1	ORF|Verified
YLL015W	5	BPT1	ORF|Verified
YLR006C	5	SSK1	ORF|Verified
YLR023C	5	IZH3	ORF|Verified
YLR095C	5	IOC2	ORF|Verified
YLR248W	5	RCK2	ORF|Verified
YLR466W	5	YRF1-4	ORF|Verified
YML103C	5	NUP188	ORF|Verified
YMR133W	5	REC114	ORF|Verified
YMR149W	5	SWP1	ORF|Verified
YMR151W	5	YIM2	ORF|Dubious
YMR163C	5	INP2	ORF|Verified
YMR165C	5	PAH1	ORF|Verified
YMR326C	5		ORF|Dubious
YNL076W	5	MKS1	ORF|Verified
YNL204C	5	SPS18	ORF|Verified
YNL206C	5	RTT106	ORF|Verified
YNR062C	5		ORF|Uncharacterized
YNR075W	5	COS10	ORF|Verified
YOL138C	5	RTC1	ORF|Verified
YOR127W	5	RGA1	ORF|Verified
YOR129C	5	AFI1	ORF|Verified
YBL031W	4	SHE1	ORF|Verified
YBL034C	4	STU1	ORF|Verified
YBR216C	4	YBP1	ORF|Verified
YDL042C	4	SIR2	ORF|Verified
YDL156W	4	CMR1	ORF|Verified
YDL239C	4	ADY3	ORF|Verified
YFR038W	4	IRC5	ORF|Verified
YGR117C	4		ORF|Uncharacterized
YGR122W	4		ORF|Verified
YGR127W	4		ORF|Uncharacterized
YGR159C	4	NSR1	ORF|Verified
YGR160W	4		ORF|Dubious
YHL007C	4	STE20	ORF|Verified
YHL015W-A	4		ORF|Uncharacterized
YHR217C	4		ORF|Dubious
YIL044C	4	AGE2	ORF|Verified
YIL049W	4	DFG10	ORF|Verified
YKL015W	4	PUT3	ORF|Verified
YKL179C	4	COY1	ORF|Verified
YKR022C	4	NTR2	ORF|Verified
YKR028W	4	SAP190	ORF|Verified
YKR039W	4	GAP1	ORF|Verified
YKR050W	4	TRK2	ORF|Verified
YKR060W	4	UTP30	ORF|Verified
YKR069W	4	MET1	ORF|Verified
YKR084C	4	HBS1	ORF|Verified
YKR086W	4	PRP16	ORF|Verified
YLR007W	4	NSE1	ORF|Verified
YLR018C	4	POM34	ORF|Verified
YLR081W	4	GAL2	ORF|Verified
YLR222C	4	UTP13	ORF|Verified
YLR223C	4	IFH1	ORF|Verified
YLR227C	4	ADY4	ORF|Verified
YLR228C	4	ECM22	ORF|Verified
YML020W	4		ORF|Uncharacterized
YMR125W	4	STO1	ORF|Verified
YMR136W	4	GAT2	ORF|Verified
YNL203C	4		ORF|Dubious
YNL205C	4		ORF|Dubious
YNR075C-A	4		ORF|Uncharacterized
YOR017W	4	PET127	ORF|Verified
YBL019W	3	APN2	ORF|Verified
YBL024W	3	NCL1	ORF|Verified
YBR225W	3		ORF|Uncharacterized
YBR239C	3	ERT1	ORF|Verified
YCR084C	3	TUP1	ORF|Verified
YDL024C	3	DIA3	ORF|Verified
YDL026W	3		ORF|Dubious
YDL037C	3	BSC1	ORF|Verified
YDL040C	3	NAT1	ORF|Verified
YDL144C	3		ORF|Verified
YDL150W	3	RPC53	ORF|Verified
YER122C	3	GLO3	ORF|Verified
YER124C	3	DSE1	ORF|Verified
YER127W	3	LCP5	ORF|Verified
YGL099W	3	LSG1	ORF|Verified
YGL110C	3	CUE3	ORF|Verified
YGL114W	3		ORF|Uncharacterized
YGR109C	3	CLB6	ORF|Verified
YGR116W	3	SPT6	ORF|Verified
YGR119C	3	NUP57	ORF|Verified
YGR121C	3	MEP1	ORF|Verified
YGR248W	3	SOL4	ORF|Verified
YGR249W	3	MGA1	ORF|Verified
YGR257C	3	MTM1	ORF|Verified
YGR261C	3	APL6	ORF|Verified
YIL045W	3	PIG2	ORF|Verified
YJR128W	3		ORF|Uncharacterized
YJR138W	3	IML1	ORF|Verified
YKL136W	3		ORF|Dubious
YKL140W	3	TGL1	ORF|Verified
YKL141W	3	SDH3	ORF|Verified
YKL161C	3	KDX1	ORF|Verified
YKL173W	3	SNU114	ORF|Verified
YKL175W	3	ZRT3	ORF|Verified
YKL176C	3	LST4	ORF|Verified
YKR005C	3		ORF|Uncharacterized
YKR009C	3	FOX2	ORF|Verified
YKR010C	3	TOF2	ORF|Verified
YKR016W	3	MIC60	ORF|Verified
YKR019C	3	IRS4	ORF|Verified
YKR055W	3	RHO4	ORF|Verified
YKR063C	3	LAS1	ORF|Verified
YKR071C	3	DRE2	ORF|Verified
YKR075C	3		ORF|Uncharacterized
YKR099W	3	BAS1	ORF|Verified
YLL019C	3	KNS1	ORF|Verified
YLR001C	3		ORF|Uncharacterized
YLR019W	3	PSR2	ORF|Verified
YLR221C	3	RSA3	ORF|Verified
YLR224W	3	UCC1	ORF|Verified
YLR232W	3		ORF|Dubious
YLR235C	3		ORF|Dubious
YLR246W	3	ERF2	ORF|Verified
YLR261C	3	VPS63	ORF|Uncharacterized
YLR431C	3	ATG23	ORF|Verified
YML100W	3	TSL1	ORF|Verified
YML107C	3	PML39	ORF|Verified
YML131W	3		ORF|Verified
YMR016C	3	SOK2	ORF|Verified
YMR084W	3		ORF|Uncharacterized
YMR085W	3		ORF|Uncharacterized
YMR129W	3	POM152	ORF|Verified
YMR131C	3	RRB1	ORF|Verified
YMR135W-A	3		ORF|Dubious
YMR152W	3	YIM1	ORF|Verified
YMR153W	3	NUP53	ORF|Verified
YMR320W	3		ORF|Uncharacterized
YNL285W	3		ORF|Dubious
YNR051C	3	BRE5	ORF|Verified
YNR058W	3	BIO3	ORF|Verified
YNR060W	3	FRE4	ORF|Verified
YOL141W	3	PPM2	ORF|Verified
YOL145C	3	CTR9	ORF|Verified
YPL092W	3	SSU1	ORF|Verified
YAL004W	2		ORF|Dubious
YBL005W-A	2	PDR3	ORF|Verified
YBL005W-B	2	PDR3	ORF|Verified
YBL022C	2	PIM1	ORF|Verified
YBL029W	2		ORF|Uncharacterized
YBL032W	2	HEK2	ORF|Verified
YBR211C	2	AME1	ORF|Verified
YBR212W	2	NGR1	ORF|Verified
YBR213W	2	MET8	ORF|Verified
YBR214W	2	SDS24	ORF|Verified
YBR218C	2	PYC2	ORF|Verified
YBR223C	2	TDP1	ORF|Verified
YBR224W	2		ORF|Dubious
YBR236C	2	ABD1	ORF|Verified
YBR282W	2	MRPL27	ORF|Verified
YCR087W	2		ORF|Dubious
YCR091W	2	KIN82	ORF|Verified
YCR092C	2	MSH3	ORF|Verified
YCR106W	2	RDS1	ORF|Verified
YDL025C	2	RTK1	ORF|Verified
YDL028C	2	MPS1	ORF|Verified
YDL030W	2	PRP9	ORF|Verified
YDL031W	2	DBP10	ORF|Verified
YDL033C	2	SLM3	ORF|Verified
YDL043C	2	PRP11	ORF|Verified
YDL048C	2	STP4	ORF|Verified
YDL151C	2	BUD30	ORF|Dubious
YDL152W	2		ORF|Dubious
YDL237W	2	AIM6	ORF|Verified
YDR096W	2	GIS1	ORF|Verified
YDR097C	2	MSH6	ORF|Verified
YDR104C	2	SPO71	ORF|Verified
YER011W	2	TIR1	ORF|Verified
YER130C	2	COM2	ORF|Verified
YFL024C	2	EPL1	ORF|Verified
YFR039C	2	OSW7	ORF|Verified
YFR042W	2	KEG1	ORF|Verified
YFR043C	2	IRC6	ORF|Verified
YGL062W	2	PYC1	ORF|Verified
YGL102C	2		ORF|Dubious
YGL116W	2	CDC20	ORF|Verified
YGR087C	2	PDC6	ORF|Verified
YGR094W	2	VAS1	ORF|Verified
YGR110W	2	CLD1	ORF|Verified
YGR111W	2		ORF|Uncharacterized
YGR122C-A	2		ORF|Dubious
YGR247W	2	CPD1	ORF|Verified
YGR250C	2	RIE1	ORF|Verified
YGR258C	2	RAD2	ORF|Verified
YGR260W	2	TNA1	ORF|Verified
YHL012W	2		ORF|Uncharacterized
YHL014C	2	YLF2	ORF|Verified
YHL016C	2	DUR3	ORF|Verified
YHL033C	2	RPL8A	ORF|Verified
YHR017W	2	YSC83	ORF|Verified
YIL043C	2	CBR1	ORF|Verified
YIL169C	2	CSS1	ORF|Verified
YJL044C	2	GYP6	ORF|Verified
YJR140W-A	2		ORF|Dubious
YKL034W	2	TUL1	ORF|Verified
YKL134C	2	43009	ORF|Verified
YKL146W	2	AVT3	ORF|Verified
YKL147C	2		ORF|Dubious
YKL164C	2	PIR1	ORF|Verified
YKL171W	2	NNK1	ORF|Verified
YKL181W	2	PRS1	ORF|Verified
YKL182W	2	FAS1	ORF|Verified
YKL203C	2	TOR2	ORF|Verified
YKR004C	2	ECM9	ORF|Verified
YKR008W	2	RSC4	ORF|Verified
YKR018C	2		ORF|Verified
YKR024C	2	DBP7	ORF|Verified
YKR036C	2	CAF4	ORF|Verified
YKR040C	2		ORF|Dubious
YKR043C	2	SHB17	ORF|Verified
YKR044W	2	UIP5	ORF|Verified
YKR053C	2	YSR3	ORF|Verified
YKR061W	2	KTR2	ORF|Verified
YKR072C	2	SIS2	ORF|Verified
YKR075W-A	2		ORF|Dubious
YKR083C	2	DAD2	ORF|Verified
YKR091W	2	SRL3	ORF|Verified
YKR096W	2	ESL2	ORF|Verified
YLL004W	2	ORC3	ORF|Verified
YLL007C	2	LMO1	ORF|Verified
YLL008W	2	DRS1	ORF|Verified
YLL010C	2	PSR1	ORF|Verified
YLR014C	2	PPR1	ORF|Verified
YLR016C	2	PML1	ORF|Verified
YLR027C	2	AAT2	ORF|Verified
YLR083C	2	EMP70	ORF|Verified
YLR090W	2	XDJ1	ORF|Verified
YLR094C	2	GIS3	ORF|Verified
YLR162W-A	2	RRT15	ORF|Uncharacterized
YLR230W	2		ORF|Dubious
YLR234W	2	TOP3	ORF|Verified
YLR249W	2	YEF3	ORF|Verified
YLR252W	2		ORF|Dubious
YLR437C	2	DIF1	ORF|Verified
YML108W	2		ORF|Verified
YML110C	2	COQ5	ORF|Verified
YML111W	2	BUL2	ORF|Verified
YMR073C	2	IRC21	ORF|Verified
YMR130W	2		ORF|Uncharacterized
YMR138W	2	CIN4	ORF|Verified
YMR139W	2	RIM11	ORF|Verified
YMR140W	2	SIP5	ORF|Verified
YMR155W	2		ORF|Uncharacterized
YMR162C	2	DNF3	ORF|Verified
YMR264W	2	CUE1	ORF|Verified
YMR309C	2	NIP1	ORF|Verified
YMR310C	2		ORF|Uncharacterized
YMR319C	2	FET4	ORF|Verified
YNL083W	2	SAL1	ORF|Verified
YNL085W	2	MKT1	ORF|Verified
YNL091W	2	NST1	ORF|Verified
YNL208W	2		ORF|Verified
YNL219C	2	ALG9	ORF|Verified
YNL288W	2	CAF40	ORF|Verified
YOL128C	2	YGK3	ORF|Verified
YOL140W	2	ARG8	ORF|Verified
YOL143C	2	RIB4	ORF|Verified
YOL144W	2	NOP8	ORF|Verified
YOL152W	2	FRE7	ORF|Verified
YOR124C	2	UBP2	ORF|Verified
YOR126C	2	IAH1	ORF|Verified
Q0045	1	COX1	ORF|Verified
Q0065	1	AI4	ORF|Verified
Q0070	1	AI5_ALPHA	ORF|Verified
Q0092	1		ORF|Dubious
Q0115	1	BI3	ORF|Verified
Q0140	1	VAR1	ORF|Verified
YAR002W	1	NUP60	ORF|Verified
YAR009C	1	SEN34	ORF|Verified
YAR042W	1	SWH1	ORF|Verified
YBL023C	1	MCM2	ORF|Verified
YBL025W	1	RRN10	ORF|Verified
YBL105C	1	PKC1	ORF|Verified
YBR011C	1	IPP1	ORF|Verified
YBR014C	1	GRX7	ORF|Verified
YBR015C	1	MNN2	ORF|Verified
YBR094W	1	PBY1	ORF|Verified
YBR128C	1	ATG14	ORF|Verified
YBR137W	1		ORF|Verified
YBR200W	1	BEM1	ORF|Verified
YBR201C-A	1		ORF|Uncharacterized
YBR201W	1	DER1	ORF|Verified
YBR202W	1	MCM7	ORF|Verified
YBR207W	1	FTH1	ORF|Verified
YBR210W	1	ERV15	ORF|Verified
YBR226C	1		ORF|Dubious
YBR228W	1	SLX1	ORF|Verified
YBR231C	1	SWC5	ORF|Verified
YBR234C	1	ARC40	ORF|Verified
YBR235W	1	VHC1	ORF|Verified
YBR238C	1		ORF|Verified
YBR277C	1		ORF|Dubious
YBR279W	1	PAF1	ORF|Verified
YBR280C	1	SAF1	ORF|Verified
YCL036W	1	GFD2	ORF|Verified
YCR018C	1	SRD1	ORF|Verified
YCR024C-B	1		ORF|Uncharacterized
YCR038C	1	BUD5	ORF|Verified
YCR040W	1	MATALPHA1	ORF|Verified
YCR081W	1	SRB8	ORF|Verified
YCR089W	1	FIG2	ORF|Verified
YCR097W-A	1		ORF|Dubious
YCR097W	1	HMRA1	ORF|Verified|silenced_gene
YCR098C	1	GIT1	ORF|Verified
YCR100C	1		ORF|Uncharacterized
YCR102C	1		ORF|Uncharacterized
YCR102W-A	1		ORF|Dubious
YCR104W	1	PAU3	ORF|Verified
YCR107W	1	AAD3	ORF|Verified
YDL025W-A	1		ORF|Dubious
YDL041W	1		ORF|Dubious
YDL044C	1	MTF2	ORF|Verified
YDL050C	1		ORF|Dubious
YDL051W	1	LHP1	ORF|Verified
YDL084W	1	SUB2	ORF|Verified
YDL090C	1	RAM1	ORF|Verified
YDL147W	1	RPN5	ORF|Verified
YDL148C	1	NOP14	ORF|Verified
YDL157C	1		ORF|Uncharacterized
YDL161W	1	ENT1	ORF|Verified
YDL164C	1	CDC9	ORF|Verified
YDL199C	1		ORF|Uncharacterized
YDL231C	1	BRE4	ORF|Verified
YDL233W	1	MFG1	ORF|Uncharacterized
YDL236W	1	PHO13	ORF|Verified
YDL240W	1	LRG1	ORF|Verified
YDR098C	1	GRX3	ORF|Verified
YDR103W	1	STE5	ORF|Verified
YDR106W	1	ARP10	ORF|Verified
YDR108W	1	TRS85	ORF|Verified
YDR179W-A	1	NVJ3	ORF|Verified
YDR210C-D	1		ORF|Uncharacterized
YDR259C	1	YAP6	ORF|Verified
YDR343C	1	HXT6	ORF|Verified
YDR406W	1	PDR15	ORF|Verified
YDR416W	1	SYF1	ORF|Verified
YDR471W	1	RPL27B	ORF|Verified
YDR490C	1	PKH1	ORF|Verified
YEL021W	1	URA3	ORF|Verified
YER001W	1	MNN1	ORF|Verified
YER014C-A	1	BUD25	ORF|Verified
YER014W	1	HEM14	ORF|Verified
YER021W	1	RPN3	ORF|Verified
YER069W	1	ARG5,6	ORF|Verified
YER096W	1	SHC1	ORF|Verified
YER118C	1	SHO1	ORF|Verified
YER119C-A	1		ORF|Dubious
YER119C	1	AVT6	ORF|Verified
YER120W	1	SCS2	ORF|Verified
YER121W	1		ORF|Uncharacterized
YER123W	1	YCK3	ORF|Verified
YFL009W	1	CDC4	ORF|Verified
YFR021W	1	ATG18	ORF|Verified
YFR024C-A	1	LSB3	ORF|Verified
YFR054C	1		ORF|Uncharacterized
YGL023C	1	PIB2	ORF|Verified
YGL026C	1	TRP5	ORF|Verified
YGL095C	1	VPS45	ORF|Verified
YGL097W	1	SRM1	ORF|Verified
YGL100W	1	SEH1	ORF|Verified
YGL101W	1		ORF|Uncharacterized
YGL108C	1		ORF|Verified
YGL109W	1		ORF|Dubious
YGL111W	1	NSA1	ORF|Verified
YGL112C	1	TAF6	ORF|Verified
YGL117W	1		ORF|Uncharacterized
YGL256W	1	ADH4	ORF|Verified
YGL257C	1	MNT2	ORF|Verified
YGL258W-A	1		ORF|Uncharacterized
YGR052W	1	FMP48	ORF|Uncharacterized
YGR075C	1	PRP38	ORF|Verified
YGR088W	1	CTT1	ORF|Verified
YGR090W	1	UTP22	ORF|Verified
YGR092W	1	DBF2	ORF|Verified
YGR100W	1	MDR1	ORF|Verified
YGR103W	1	NOP7	ORF|Verified
YGR104C	1	SRB5	ORF|Verified
YGR108W	1	CLB1	ORF|Verified
YGR114C	1		ORF|Dubious
YGR125W	1		ORF|Uncharacterized
YGR129W	1	SYF2	ORF|Verified
YGR156W	1	PTI1	ORF|Verified
YGR157W	1	CHO2	ORF|Verified
YGR161C	1	RTS3	ORF|Uncharacterized
YGR251W	1	NOP19	ORF|Verified
YGR252W	1	GCN5	ORF|Verified
YGR266W	1		ORF|Verified
YGR271W	1	SLH1	ORF|Verified
YHL004W	1	MRP4	ORF|Verified
YHL005C	1		ORF|Uncharacterized
YHL006C	1	SHU1	ORF|Verified
YHL010C	1	ETP1	ORF|Verified
YHL026C	1		ORF|Uncharacterized
YHL030W-A	1		ORF|Dubious
YHL031C	1	GOS1	ORF|Verified
YHL034C	1	SBP1	ORF|Verified
YHR008C	1	SOD2	ORF|Verified
YHR012W	1	VPS29	ORF|Verified
YHR013C	1	ARD1	ORF|Verified
YHR015W	1	MIP6	ORF|Verified
YHR020W	1		ORF|Verified
YHR024C	1	MAS2	ORF|Verified
YHR072W	1	ERG7	ORF|Verified
YHR073W	1	OSH3	ORF|Verified
YHR078W	1		ORF|Uncharacterized
YIL013C	1	PDR11	ORF|Verified
YIL017C	1	VID28	ORF|Verified
YIL030C	1	SSM4	ORF|Verified
YIL050W	1	PCL7	ORF|Verified
YIR030C	1	DCG1	ORF|Verified
YJL033W	1	HCA4	ORF|Verified
YJL043W	1		ORF|Uncharacterized
YJL045W	1		ORF|Verified
YJL046W	1	AIM22	ORF|Verified
YJL076W	1	NET1	ORF|Verified
YJL089W	1	SIP4	ORF|Verified
YJL113W	1	MDV1	ORF|Verified
YJR027W	1	BNA1	ORF|Verified
YJR132W	1	NMD5	ORF|Verified
YJR134C	1	SGM1	ORF|Verified
YKL002W	1	DID4	ORF|Verified
YKL006W	1	RPL14A	ORF|Verified
YKL012W	1	PRP40	ORF|Verified
YKL032C	1	IXR1	ORF|Verified
YKL033W-A	1		ORF|Uncharacterized
YKL064W	1	MNR2	ORF|Verified
YKL104C	1	GFA1	ORF|Verified
YKL116C	1	PRR1	ORF|Verified
YKL135C	1	APL2	ORF|Verified
YKL137W	1	CMC1	ORF|Verified
YKL153W	1		ORF|Dubious
YKL154W	1	SRP102	ORF|Verified
YKL157W	1	APE2	ORF|Verified
YKL162C-A	1		ORF|Dubious
YKL165C	1	MCD4	ORF|Verified
YKL166C	1	TPK3	ORF|Verified
YKL167C	1	MRP49	ORF|Verified
YKL169C	1		ORF|Dubious
YKL174C	1	TPO5	ORF|Verified
YKL212W	1	SAC1	ORF|Verified
YKR001C	1	VPS1	ORF|Verified
YKR003W	1	OSH6	ORF|Verified
YKR011C	1		ORF|Verified
YKR020W	1	VPS51	ORF|Verified
YKR025W	1	RPC37	ORF|Verified
YKR032W	1		ORF|Uncharacterized
YKR041W	1		ORF|Verified
YKR066C	1	CCP1	ORF|Verified
YKR073C	1		ORF|Uncharacterized
YKR077W	1	MSA2	ORF|Verified
YKR078W	1		ORF|Verified
YKR081C	1	RPF2	ORF|Verified
YKR085C	1	MRPL20	ORF|Verified
YKR087C	1	OMA1	ORF|Verified
YKR088C	1	TVP38	ORF|Verified
YKR092C	1	SRP40	ORF|Verified
YKR100C	1	SKG1	ORF|Verified
YLL005C	1	SPO75	ORF|Verified
YLL014W	1	EMC6	ORF|Verified
YLL043W	1	FPS1	ORF|Verified
YLR002C	1	NOC3	ORF|Verified
YLR020C	1	YEH2	ORF|Verified
YLR021W	1	IRC25	ORF|Verified
YLR035C-A	1	MLH2	ORF|Verified
YLR080W	1	EMP46	ORF|Verified
YLR082C	1	SRL2	ORF|Verified
YLR089C	1	ALT1	ORF|Verified
YLR092W	1	SUL2	ORF|Verified
YLR093C	1	NYV1	ORF|Verified
YLR097C	1	HRT3	ORF|Verified
YLR098C	1	CHA4	ORF|Verified
YLR099C	1	ICT1	ORF|Verified
YLR177W	1		ORF|Uncharacterized
YLR188W	1	MDL1	ORF|Verified
YLR220W	1	CCC1	ORF|Verified
YLR226W	1	BUR2	ORF|Verified
YLR229C	1	CDC42	ORF|Verified
YLR236C	1		ORF|Dubious
YLR251W	1	SYM1	ORF|Verified
YLR253W	1	MCP2	ORF|Verified
YLR257W	1		ORF|Verified
YLR258W	1	GSY2	ORF|Verified
YLR260W	1	LCB5	ORF|Verified
YLR264C-A	1		ORF|Uncharacterized
YLR305C	1	STT4	ORF|Verified
YLR337C	1	VRP1	ORF|Verified
YLR338W	1	OPI9	ORF|Dubious
YLR392C	1	ART10	ORF|Verified
YLR410W-B	1	VIP1	ORF|Verified
YLR432W	1	IMD3	ORF|Verified
YLR433C	1	CNA1	ORF|Verified
YLR435W	1	TSR2	ORF|Verified
YLR439W	1	MRPL4	ORF|Verified
YLR440C	1	SEC39	ORF|Verified
YLR452C	1	SST2	ORF|Verified
YML039W	1	YMD8	ORF|Verified
YML042W	1	CAT2	ORF|Verified
YML052W	1	SUR7	ORF|Verified
YML086C	1	ALO1	ORF|Verified
YML100W-A	1		ORF|Uncharacterized
YML102W	1	CAC2	ORF|Verified
YML117W	1	NAB6	ORF|Verified
YMR027W	1		ORF|Verified
YMR045C	1	IOC4	ORF|Verified
YMR046C	1	IOC4	ORF|Verified
YMR075W	1	RCO1	ORF|Verified
YMR080C	1	NAM7	ORF|Verified
YMR126C	1	DLT1	ORF|Uncharacterized
YMR127C	1	SAS2	ORF|Verified
YMR134W	1	ERG29	ORF|Verified
YMR137C	1	PSO2	ORF|Verified
YMR144W	1	FDO1	ORF|Uncharacterized
YMR147W	1		ORF|Uncharacterized
YMR157C	1	AIM36	ORF|Verified
YMR158W-B	1		ORF|Dubious
YMR160W	1		ORF|Verified
YMR205C	1	PFK2	ORF|Verified
YMR207C	1	HFA1	ORF|Verified
YMR237W	1	BCH1	ORF|Verified
YMR311C	1	GLC8	ORF|Verified
YMR313C	1	TGL3	ORF|Verified
YMR315W-A	1		ORF|Uncharacterized
YMR315W	1		ORF|Verified
YMR316C-A	1		ORF|Uncharacterized
YMR316W	1	DIA1	ORF|Verified
YNL054W-A	1	VAC7	ORF|Verified
YNL054W-B	1	VAC7	ORF|Verified
YNL074C	1	MLF3	ORF|Verified
YNL075W	1	IMP4	ORF|Verified
YNL077W	1	APJ1	ORF|Verified
YNL079C	1	TPM1	ORF|Verified
YNL081C	1	SWS2	ORF|Verified
YNL086W	1	SNN1	ORF|Verified
YNL088W	1	TOP2	ORF|Verified
YNL089C	1		ORF|Dubious
YNL090W	1	RHO2	ORF|Verified
YNL092W	1		ORF|Verified
YNL094W	1	APP1	ORF|Verified
YNL097C	1	PHO23	ORF|Verified
YNL097W-A	1		ORF|Dubious
YNL132W	1	KRE33	ORF|Verified
YNL157W	1	IGO1	ORF|Verified
YNL199C	1	GCR2	ORF|Verified
YNL201C	1	PSY2	ORF|Verified
YNL209W	1	SSB2	ORF|Verified
YNL210W	1	MER1	ORF|Verified
YNL233W	1	BNI4	ORF|Verified
YNL236W	1	SIN4	ORF|Verified
YNL249C	1	MPA43	ORF|Verified
YNL278W	1	CAF120	ORF|Verified
YNL284C	1	MRPL10	ORF|Verified
YNL286W	1	CUS2	ORF|Verified
YNL290W	1	RFC3	ORF|Verified
YNL291C	1	MID1	ORF|Verified
YNL303W	1		ORF|Dubious
YNL304W	1	YPT11	ORF|Verified
YNL317W	1	PFS2	ORF|Verified
YNL318C	1	HXT14	ORF|Verified
YNR068C	1		ORF|Uncharacterized
YOL040C	1	RPS15	ORF|Verified
YOL136C	1	PFK27	ORF|Verified
YOL137W	1	BSC6	ORF|Verified
YOL146W	1	PSF3	ORF|Verified
YOL147C	1	PEX11	ORF|Verified
YOR016C	1	ERP4	ORF|Verified
YOR035C	1	SHE4	ORF|Verified
YOR112W	1	CEX1	ORF|Verified
YOR125C	1	CAT5	ORF|Verified
YOR128C	1	ADE2	ORF|Verified
YOR135C	1	IRC14	ORF|Dubious
YOR216C	1	RUD3	ORF|Verified
YPL062W	1		ORF|Dubious
YPL084W	1	BRO1	ORF|Verified
YPL091W	1	GLR1	ORF|Verified
YPL093W	1	NOG1	ORF|Verified
YPL169C	1	MEX67	ORF|Verified
YPL173W	1	MRPL40	ORF|Verified
YPL174C	1	NIP100	ORF|Verified
YPL188W	1	POS5	ORF|Verified
YPL189C-A	1	COA2	ORF|Verified
YPL236C	1	ENV7	ORF|Verified
YPR116W	1		tRNA_gene
YPR175W	1		tRNA_gene

## Sheet: go_slim_genes_nonsyn
GOID	GO term	Frequency	Genome Frequency	Gene(s)
8150	biological process unknown	159 out of 709 genes, 22.4%	1133 of 6433 genes, 17.6%	Q0092,YAL004W,YBL029W,PBY1,YBR201C-A,YBR224W,YBR225W,YBR226C,YBR277C,GFD2,YCR024C-B,YCR087W,YCR097W-A,YCR100C,YCR102W-A,PAU3,YCR108C,RTK1,YDL025W-A,YDL026W,MRX9,BSC1,YDL041W,STP4,YDL050C,YDL144C,YDL152W,YDL157C,MFG1,AIM6,YDR544C,TIR1,YER119C-A,YER121W,COM2,CSS2,YFR054C,PIB2,TOS8,YGL101W,YGL102C,YGL108C,YGL109W,CUE3,YGL117W,VEL1,YGL258W-A,YPS5,NNF2,YGR114C,YGR117C,YGR122C-A,YGR125W,YGR127W,YGR130C…
42221	response to chemical	54 out of 709 genes, 7.6%	446 of 6433 genes, 6.9%	NCL1,FLR1,GRX7,BEM1,DER1,YBP1,ERT1,SRB8,TUP1,FIG2,KIN82,YCR102C,RDS1,GPR1,GRX3,STE5,PDR15,GPA2,DSE1,BST1,CTT1,ASK10,SPT6,STE20,ETP1,SOD2,SSM4,SIP4,IXR1,PRR1,SPO14,OAF3,CCP1,DRE2,FPS1,UBR2,HRT3,UCC1,CDC42,RCK2,HAP1,CNA1,SST2,ALO1,IRC21,DNF3,CUE1,MLF3,PSY2,YNR064C,RGA1,BRO1,GLR1,POS5
6366	transcription from RNA polymerase II promoter	52 out of 709 genes, 7.3%	476 of 6433 genes, 7.4%	HPC2,ERT1,PAF1,MATALPHA1,SRB8,TUP1,SUB2,BUD30,GIS1,YAP6,SRB4,EPL1,TAF6,SRB5,SPT6,YGR122W,PTI1,GCN5,RAD2,STE20,YAP3,VID28,SIP4,HIR3,BYE1,PUT3,IXR1,PRR1,RSC4,CAF4,OAF3,NUP133,BAS1,PPR1,IFH1,BUR2,ECM22,HAP1,PDR8,RCO1,GAT2,MSS11,ELP6,MKS1,PHO23,GCR2,RTT106,SIN4,CAF120,CAF40,CTR9,IRC14
278	mitotic cell cycle	40 out of 709 genes, 5.6%	319 of 6433 genes, 5%	SHE1,PKC1,ERV15,HPC2,PAF1,BUD5,MPS1,BUD30,CDC9,ARP10,BUD25,CDC4,CDC20,ESP1,CLB1,CLB6,SPT6,STE20,NET1,HIR3,SAP190,DYN1,SIS2,MSA2,TVP38,SFI1,RAX2,SMC4,BUR2,CDC42,TOP3,VRP1,ZDS2,NUP53,NIS1,TOP2,BNI4,CTR9,AFI1,NIP100
6325	chromatin organization	38 out of 709 genes, 5.4%	318 of 6433 genes, 4.9%	NUP60,MCM7,HPC2,SWC5,RIF1,PAF1,TUP1,SIR2,SUB2,GIS1,GRX3,SCS2,EPL1,TAF6,SPT6,GCN5,ARD1,NET1,HIR3,RSC4,TOF2,IRS4,SET3,NUP133,ORC3,IOC2,IFH1,BUR2,CAC2,ZDS2,RCO1,NAM7,SAS2,TOP2,PHO23,RTT106,CTR9,DPB2
23052	signaling	35 out of 709 genes, 4.9%	245 of 6433 genes, 3.8%	PKC1,COS111,PPS1,GPR1,LRG1,STE5,PKH1,GPA2,SHO1,DSE1,SEH1,STE20,SYG1,IML1,TPK3,LST4,TOR2,IRS4,SAP190,OMA1,PXL1,LMO1,SSK1,GIS3,CDC42,RCK2,LCB5,CNA1,SST2,MKS1,RHO2,PSY2,WSC2,RTC1,RGA1
48285	organelle fission	33 out of 709 genes, 4.7%	302 of 6433 genes, 4.7%	SHE1,MSH3,MPS1,MSH5,MSH6,ARP10,TRS85,CDC4,CDC20,DBF2,ESP1,CLB1,STE20,SPO13,NET1,VPS1,SET3,CAF4,DYN1,TVP38,SMC4,BUR2,CDC42,TOP3,RCK2,RED1,REC114,NUP53,NIS1,TOP2,PSY2,MER1,PEX11
6974	cellular response to DNA damage stimulus	32 out of 709 genes, 4.5%	307 of 6433 genes, 4.8%	NUP60,APN2,MCM2,MCM7,TDP1,RIF1,PAF1,TUP1,MSH3,SUB2,CMR1,CDC9,MSH6,BUD27,EPL1,RAD2,SHU1,IXR1,TRM2,NUP133,NSE1,YLR235C,IRC20,NEJ1,PSO2,YIM1,MKT1,PSY2,RFC3,CTR9,PSF3,DPB2
33043	regulation of organelle organization	32 out of 709 genes, 4.5%	283 of 6433 genes, 4.4%	MCM2,ARC40,PAF1,ABP1,MPS1,GRX3,VPS45,CDC20,ESP1,CLB1,SPT6,STE20,SPO13,MHP1,NET1,IML1,HIR3,SET3,RHO4,DAD2,SSK1,BUR2,CDC42,EST1,RCK2,RED1,NUP53,NIS1,PHO23,PSY2,CTR9,ENV7
6605	protein targeting	32 out of 709 genes, 4.5%	307 of 6433 genes, 4.8%	NUP60,PEP1,ATG14,YBR137W,ATG9,COS7,TRS85,SCS2,ATG18,VPS45,NUP57,APL6,MAS2,NMD5,OCT1,SDH3,SRP102,VPS1,MIC60,VPS51,NUP133,POM34,XDJ1,ERF2,VPS63,ATG23,NUP188,POM152,NUP53,ATG2,COS10,BRO1
6629	lipid metabolic process	31 out of 709 genes, 4.4%	296 of 6433 genes, 4.6%	TUP1,GIS1,SCS2,BST1,CLD1,CHO2,ERG7,DFG10,TGL1,MCD4,FAS1,SAC1,OSH6,FOX2,SPO14,YSR3,GPT2,YEH1,YEH2,ICT1,ECM22,LCB5,STT4,ERG29,PAH1,HFA1,TGL3,APP1,ALG9,PEX11,GRE2
51321	meiotic cell cycle	31 out of 709 genes, 4.4%	282 of 6433 genes, 4.4%	MSH3,BUD30,MSH5,ADY3,MSH6,SPO71,TRS85,GPA2,SHC1,CDC4,OSW7,LSG1,CDC20,CLB1,CLB6,SPO13,VID28,SET3,SPO14,SPO75,SMC4,TOP3,RCK2,RED1,SUR7,REC114,RIM11,TOP2,PSY2,MER1,IRC14
7010	cytoskeleton organization	30 out of 709 genes, 4.2%	238 of 6433 genes, 3.7%	SHE1,STU1,PKC1,ARC40,ABP1,MPS1,ENT1,GRX3,ESP1,CLB1,MYO1,MHP1,TOR2,VPS1,DYN1,RHO4,DAD2,TVP38,SFI1,SSK1,POM34,CDC42,VRP1,POM152,TPM1,RHO2,APP1,SHE4,RGA1,NIP100
6811	ion transport	28 out of 709 genes, 3.9%	263 of 6433 genes, 4.1%	ATP6,FTH1,KIN82,GIT1,ENA1,AVT6,MEP1,MTM1,TNA1,YHL008C,DUR3,DID4,AVT3,MCD4,ZRT3,GAP1,BPT1,FPS1,SUL2,CCC1,DNF3,PFK2,FET4,SAL1,MID1,FRE7,BRO1,SSU1
6281	DNA repair	27 out of 709 genes, 3.8%	256 of 6433 genes, 4%	NUP60,APN2,MCM2,MCM7,TDP1,RIF1,PAF1,MSH3,SUB2,CDC9,MSH6,BUD27,EPL1,RAD2,SHU1,IXR1,TRM2,NUP133,NSE1,IRC20,NEJ1,PSO2,PSY2,RFC3,CTR9,PSF3,DPB2
6364	rRNA processing	27 out of 709 genes, 3.8%	311 of 6433 genes, 4.8%	PAF1,SRD1,DBP10,NOP14,SAS10,LCP5,UTP22,NOP7,UTP8,NSR1,NOP19,RPL8A,HCA4,URB1,DBP7,UTP30,LAS1,RPF2,DRS1,NOC3,UTP13,TSR2,ECM16,IMP4,SSB2,NOP8,NOG1
6468	protein phosphorylation	26 out of 709 genes, 3.7%	197 of 6433 genes, 3.1%	PKC1,PPS1,PAF1,KIN82,MPS1,STE5,PKH1,YCK3,SAK1,FMP48,DBF2,CLB1,CLB6,STE20,PCL7,PRR1,TPK3,NNK1,TOR2,KNS1,SSK1,BUR2,RCK2,RIM11,YGK3,CTR9
7005	mitochondrion organization	26 out of 709 genes, 3.7%	265 of 6433 genes, 4.1%	NGR1,SLM3,ATG9,ADY3,MAS2,OCT1,CMC1,SDH3,TPK3,MIC60,CAF4,TRZ1,OMA1,LMO1,PUF3,XDJ1,MCP2,STT4,MDM1,ERG29,TPM1,ATG2,YPT11,PET127,COA2,RRG8
5975	carbohydrate metabolic process	24 out of 709 genes, 3.4%	198 of 6433 genes, 3.1%	PYC2,ERT1,PHO13,LRG1,SAK1,KEG1,PYC1,GUT1,VID28,PIG2,PCL7,SIP4,GFA1,BCH2,GLG1,GAL2,GSY2,TSL1,MSS11,PFK2,BCH1,GLC8,GCR2,PFK27
51726	regulation of cell cycle	24 out of 709 genes, 3.4%	233 of 6433 genes, 3.6%	MPS1,CMR1,CDC20,DBF2,ESP1,CLB1,CLB6,STE20,SPO13,PCL7,NET1,TOR2,SET3,SIS2,DAD2,CDC42,RCK2,RED1,VRP1,ZDS2,NUP53,NIS1,TOP2,PSY2
51169	nuclear transport	24 out of 709 genes, 3.4%	181 of 6433 genes, 2.8%	NUP60,SUB2,SCS2,SRM1,LSG1,SEH1,UTP22,SPT6,NUP57,UTP8,MIP6,NMD5,NUP133,SRP40,PML1,POM34,NUP188,POM152,NUP53,SSB2,RPS15,CEX1,NOG1,MEX67
6397	mRNA processing	22 out of 709 genes, 3.1%	170 of 6433 genes, 2.6%	ABD1,PRP5,PAF1,PRP9,PRP11,MTF2,SUB2,SYF1,PRP38,SPT6,SYF2,PTI1,PRP40,SNU114,NTR2,PRP16,PML1,STO1,MER1,CUS2,PFS2,CTR9
6310	DNA recombination	21 out of 709 genes, 3%	185 of 6433 genes, 2.9%	AI4,AI5_ALPHA,MCM2,MCM7,PAF1,MSH3,SIR2,MSH5,CDC9,BUD27,IRC5,SHU1,TOP3,IRC20,YRF1-4,NAM7,REC114,TOP2,MER1,PSF3,IRC14
71554	cell wall organization or biogenesis	21 out of 709 genes, 3%	198 of 6433 genes, 3.1%	PKC1,ADY3,LRG1,SPO71,PKH1,OSW7,MHP1,GFA1,PIR3,PIR1,PRS1,IRS4,BCH2,KTR2,SKG1,SPO75,YEH2,CNA1,BCH1,RHO2,WSC2
51603	proteolysis involved in cellular protein catabolic process	21 out of 709 genes, 3%	216 of 6433 genes, 3.4%	PIM1,DER1,SAF1,RPN5,COS7,RPN3,CDC4,BST1,CDC20,VID28,SSM4,DID4,TUL1,OMA1,UBR2,HRT3,UCC1,CUE1,COS10,UBP2,BRO1
6260	DNA replication	20 out of 709 genes, 2.8%	139 of 6433 genes, 2.2%	MCM2,MCM7,SLX1,RIF1,PPS1,MSH3,SIR2,CDC9,MSH6,SAK1,NOP7,CLB6,ORC3,NOC3,SMC4,RCO1,TOP2,RFC3,PSF3,DPB2
70271	protein complex biogenesis	19 out of 709 genes, 2.7%	293 of 6433 genes, 4.6%	PIM1,STU1,ARC40,ABP1,ATG9,BUD27,VPS45,SPT6,TRS65,CLC1,ECM29,UFD4,CMC1,DAD2,IRC25,CIN4,PFK2,CTR9,COA2
6091	generation of precursor metabolites and energy	19 out of 709 genes, 2.7%	154 of 6433 genes, 2.4%	COX1,YBR238C,RMD9,ADH4,PIG2,PCL7,YJL045W,SDH3,GLG1,PUF3,CSF1,HAP1,GSY2,COQ5,PAH1,PFK2,GLC8,GCR2,PFK27
48193	Golgi vesicle transport	19 out of 709 genes, 2.7%	191 of 6433 genes, 3%	ERV15,COP1,TRS85,GLO3,BST1,VPS45,TRS65,APL6,GOS1,AGE2,APL2,COY1,BCH2,EMP46,SEC39,BCH1,BRE5,ERP4,RUD3
746	conjugation	18 out of 709 genes, 2.5%	124 of 6433 genes, 1.9%	BEM1,FIG2,KIN82,PRM7,LRG1,STE5,DSE1,LSG1,STE20,OSH3,PRR1,SPO14,FPS1,CDC42,CNA1,SST2,DNF3,RGA1
70647	protein modification by small protein conjugation or removal	18 out of 709 genes, 2.5%	170 of 6433 genes, 2.6%	NUP60,PAF1,RPN5,CDC4,CDC20,UFD4,TUL1,UBR2,BUR2,BUL2,NAM7,NUP53,ELP6,APJ1,BRE5,CTR9,UBP2,BRO1
8380	RNA splicing	17 out of 709 genes, 2.4%	144 of 6433 genes, 2.2%	AI4,BI3,PRP5,PRP9,PRP11,SUB2,SYF1,PRP38,SYF2,PRP40,SNU114,NTR2,PRP16,PML1,STO1,MER1,CUS2
31399	regulation of protein modification process	17 out of 709 genes, 2.4%	111 of 6433 genes, 1.7%	NUP60,PPS1,PAF1,GRX3,STE5,CDC20,ESP1,CLB1,CLB6,SPT6,STE20,PCL7,HIR3,SSK1,BUR2,NUP53,CTR9
32196	transposition	17 out of 709 genes, 2.4%	110 of 6433 genes, 1.7%	YAR009C,YBL005W-A,YBL005W-B,YBL100W-A,YBL100W-B,STE5,YDR210C-D,BRF1,YJL113W,YJR027W,YLR035C-A,YLR410W-B,YML039W,YMR045C,YMR046C,YNL054W-A,YNL054W-B
18193	peptidyl-amino acid modification	17 out of 709 genes, 2.4%	151 of 6433 genes, 2.3%	NUP60,RKM3,PAF1,PKH1,SAK1,EPL1,TAF6,SPT6,GCN5,ARD1,HIR3,KNS1,BUR2,SAS2,NUP53,APJ1,CTR9
15931	nucleobase-containing compound transport	17 out of 709 genes, 2.4%	143 of 6433 genes, 2.2%	NUP60,SUB2,SRM1,UTP22,SPT6,UTP8,MIP6,DID4,MCD4,NUP133,PML1,NUP188,SAL1,RPS15,CEX1,BRO1,MEX67
55085	transmembrane transport	16 out of 709 genes, 2.3%	234 of 6433 genes, 3.6%	ATP6,FLR1,FTH1,VHC1,GIT1,YDL199C,ENA1,HXT6,AVT6,TNA1,SDH3,AVT3,MIC60,XDJ1,MDL1,FET4
70925	organelle assembly	16 out of 709 genes, 2.3%	135 of 6433 genes, 2.1%	PKC1,MPS1,ATG9,TRS85,PKH1,LSG1,NSR1,TIF4631,STE20,IML1,RPF2,SFI1,DRS1,RSA3,ATG23,ATG2
7059	chromosome segregation	16 out of 709 genes, 2.3%	203 of 6433 genes, 3.2%	SHE1,AME1,MPS1,SIR2,CDC20,ESP1,SPO13,DYN1,DAD2,TVP38,SMC4,BUR2,TOP3,RED1,GLC8,RFC3
6897	endocytosis	16 out of 709 genes, 2.3%	97 of 6433 genes, 1.5%	SWH1,FTH1,SDS24,LDB17,ENT1,BRE4,PKH1,CLC1,OSH3,TOR2,VPS1,OSH6,ALY1,VRP1,SUR7,COS10
43934	sporulation	15 out of 709 genes, 2.1%	133 of 6433 genes, 2.1%	BUD30,ADY3,SPO71,GPA2,SHC1,OSW7,LSG1,VID28,SPO14,SPO75,ADY4,SUR7,RIM11,SPS18,IRC14
7124	pseudohyphal growth	15 out of 709 genes, 2.1%	74 of 6433 genes, 1.2%	DIA3,GPR1,GPA2,SAK1,STE20,OSH3,DFG10,EMP70,CDC42,SOK2,MSS11,DIA1,MKS1,TPM1,RGA1
1403	invasive growth in response to glucose limitation	15 out of 709 genes, 2.1%	59 of 6433 genes, 0.9%	TUP1,FIG2,DIA3,GPR1,STE5,DSE1,STE20,OSH3,SIP4,EMP70,CDC42,MSS11,DIA1,PHO23,RGA1
42274	ribosomal small subunit biogenesis	14 out of 709 genes, 2%	135 of 6433 genes, 2.1%	NOP14,SAS10,LCP5,UTP22,NOP7,UTP8,NSR1,NOP19,UTP30,UTP13,TSR2,ECM16,IMP4,KRE33
16570	histone modification	14 out of 709 genes, 2%	114 of 6433 genes, 1.8%	PAF1,GIS1,GRX3,EPL1,TAF6,SPT6,GCN5,ARD1,HIR3,SET3,BUR2,RCO1,SAS2,CTR9
51186	cofactor metabolic process	14 out of 709 genes, 2%	179 of 6433 genes, 2.8%	MET8,HEM14,SOL4,MET1,DRE2,SIS2,COQ5,PFK2,YMR315W,GCR2,BIO3,PFK27,CAT5,POS5
55086	nucleobase-containing small molecule metabolic process	14 out of 709 genes, 2%	198 of 6433 genes, 3.1%	COX1,ATP6,URA3,CPD1,SOL4,SIS2,PPR1,IMD3,PFK2,YMR315W,GCR2,PFK27,ADE2,POS5
42273	ribosomal large subunit biogenesis	14 out of 709 genes, 2%	104 of 6433 genes, 1.6%	DBP10,LSG1,NSA1,NOP7,TIF4631,RPL8A,URB1,DBP7,LAS1,RPF2,DRS1,RSA3,NOP8,NOG1
6520	cellular amino acid metabolic process	13 out of 709 genes, 1.8%	199 of 6433 genes, 3.1%	ARG5,6,HIS2,TRP5,ADH4,PDC6,VAS1,YHR020W,MET5,PUT3,AAT2,ALT1,CHA4,ARG8
6979	response to oxidative stress	13 out of 709 genes, 1.8%	105 of 6433 genes, 1.6%	NCL1,GRX7,YBP1,GRX3,CTT1,ASK10,SOD2,CCP1,DRE2,RCK2,ALO1,GLR1,POS5
6873	cellular ion homeostasis	13 out of 709 genes, 1.8%	128 of 6433 genes, 2%	GRX3,VPS45,DBF2,MNR2,OCT1,ZRT3,TRK2,IZH3,EMP70,CCC1,CNA1,ERG29,PFK2
6970	response to osmotic stress	13 out of 709 genes, 1.8%	92 of 6433 genes, 1.4%	ENA1,SHO1,CTT1,STE20,SIS2,PSR1,SSK1,PSR2,RCK2,STO1,RIM11,NST1,YGK3
7033	vacuole organization	13 out of 709 genes, 1.8%	88 of 6433 genes, 1.4%	ATG9,TRS85,VPS45,STE20,IML1,BPT1,NYV1,CDC42,ATG23,PAH1,TPM1,ATG2,ENV7
910	cytokinesis	12 out of 709 genes, 1.7%	84 of 6433 genes, 1.3%	PKC1,ERV15,BUD5,BUD30,BUD25,DBF2,STE20,MYO1,RAX2,VRP1,BNI4,AFI1
51052	regulation of DNA metabolic process	12 out of 709 genes, 1.7%	107 of 6433 genes, 1.7%	PAF1,MSH3,SIR2,MSH6,CLB6,UFD4,EST1,TOP3,RCO1,TOP2,PSY2,CTR9
9408	response to heat	12 out of 709 genes, 1.7%	73 of 6433 genes, 1.1%	NUP60,SHO1,STE20,NUP133,PSR1,PSR2,LCB5,NUP188,RIM11,PHO23,WSC2,YGK3
16197	endosomal transport	11 out of 709 genes, 1.6%	102 of 6433 genes, 1.6%	COS7,PKH1,ATG18,VPS45,TDA3,VPS29,DID4,VPS51,EMP70,COS10,BRO1
32787	monocarboxylic acid metabolic process	11 out of 709 genes, 1.6%	140 of 6433 genes, 2.2%	TUP1,FAS1,FOX2,AAT2,PFK2,HFA1,GCR2,BIO3,PFK27,PEX11,IAH1
6354	DNA-templated transcription, elongation	11 out of 709 genes, 1.6%	97 of 6433 genes, 1.5%	HPC2,PAF1,SUB2,SPT6,GCN5,HIR3,RSC4,RCO1,RTT106,CAF40,CTR9
51049	regulation of transport	11 out of 709 genes, 1.6%	85 of 6433 genes, 1.3%	TUP1,SCS2,VPS45,ASK10,CLC1,STE20,TOR2,ALY1,ECM22,CDC42,BRE5
6997	nucleus organization	10 out of 709 genes, 1.4%	66 of 6433 genes, 1.0%	NUP57,OSH3,NET1,TOF2,NUP133,POM34,NUP188,MDM1,POM152,NUP53
16050	vesicle organization	10 out of 709 genes, 1.4%	81 of 6433 genes, 1.3%	TRS85,GLO3,BST1,VPS45,GOS1,DID4,VPS51,NYV1,SNN1,BRO1
6869	lipid transport	9 out of 709 genes, 1.3%	68 of 6433 genes, 1.1%	SWH1,KIN82,SCS2,STE20,OSH3,PDR11,OSH6,ECM22,DNF3
7114	cell budding	9 out of 709 genes, 1.3%	58 of 6433 genes, 0.9%	ERV15,BUD5,STE20,VPS51,CDC42,VRP1,TGL3,TPM1,RGA1
45333	cellular respiration	9 out of 709 genes, 1.3%	83 of 6433 genes, 1.3%	COX1,YBR238C,RMD9,YJL045W,SDH3,PUF3,HAP1,COQ5,PAH1
32543	mitochondrial translation	9 out of 709 genes, 1.3%	167 of 6433 genes, 2.6%	VAR1,MRPL27,MRP4,MRP49,MRPL20,MRPL4,SWS2,MRPL10,MRPL40
8033	tRNA processing	9 out of 709 genes, 1.3%	109 of 6433 genes, 1.7%	NCL1,SLM3,PUS9,LHP1,SAP190,TRM2,TRZ1,ELP6,PPM2
9451	RNA modification	8 out of 709 genes, 1.1%	172 of 6433 genes, 2.7%	NCL1,SLM3,PUS9,TOR2,SAP190,TRM2,ELP6,PPM2
6401	RNA catabolic process	8 out of 709 genes, 1.1%	132 of 6433 genes, 2.1%	PKC1,PKH1,YGR122W,HBS1,PUF3,IRC25,NAM7,STO1
48308	organelle inheritance	8 out of 709 genes, 1.1%	60 of 6433 genes, 0.9%	ADY3,SCS2,VPS45,STE20,MDM1,INP2,TPM1,YPT11
43543	protein acylation	8 out of 709 genes, 1.1%	66 of 6433 genes, 1.0%	NAT1,EPL1,TAF6,GCN5,ARD1,HIR3,ERF2,SAS2
48284	organelle fusion	8 out of 709 genes, 1.1%	89 of 6433 genes, 1.4%	VPS45,GOS1,OSH3,BPT1,NYV1,CDC42,PAH1,ENV7
6352	DNA-templated transcription, initiation	7 out of 709 genes, 1%	73 of 6433 genes, 1.1%	SRB4,TAF6,SRB5,SPT6,BRF1,SIN4,CTR9
6486	protein glycosylation	7 out of 709 genes, 1%	62 of 6433 genes, 1%	MNN2,MNN1,MNT2,KTR2,SWP1,ALG9,MNT4
2181	cytoplasmic translation	7 out of 709 genes, 1%	180 of 6433 genes, 2.8%	MTF2,RPL27B,SLH1,RPL8A,RPL14A,SSB2,RPS15
61025	membrane fusion	7 out of 709 genes, 1%	76 of 6433 genes, 1.2%	VPS45,GOS1,BPT1,NYV1,CDC42,PAH1,ENV7
6353	DNA-templated transcription, termination	6 out of 709 genes, 0.8%	43 of 6433 genes, 0.7%	PAF1,SRB5,SPT6,PTI1,BUR2,CTR9
6887	exocytosis	6 out of 709 genes, 0.8%	49 of 6433 genes, 0.8%	SWH1,OSH3,OSH6,SPO14,CDC42,TPM1
42594	response to starvation	6 out of 709 genes, 0.8%	56 of 6433 genes, 0.9%	ENA1,GIS1,IRS4,ECM22,SIP5,SSB2
8213	protein alkylation	6 out of 709 genes, 0.8%	50 of 6433 genes, 0.8%	RKM3,PAF1,SPT6,BUR2,YNL092W,CTR9
51604	protein maturation	6 out of 709 genes, 0.8%	52 of 6433 genes, 0.8%	ATG18,MAS2,OCT1,CSF1,RIM13,ENV7
32200	telomere organization	6 out of 709 genes, 0.8%	78 of 6433 genes, 1.2%	HEK2,RIF1,TEL2,EST1,TOP3,YRF1-4
6417	regulation of translation	6 out of 709 genes, 0.8%	105 of 6433 genes, 1.6%	NGR1,SLH1,SBP1,HBS1,NAM7,SSB2
54	ribosomal subunit export from nucleus	5 out of 709 genes, 0.7%	46 of 6433 genes, 0.7%	SRM1,LSG1,SSB2,NOG1,MEX67
6360	transcription from RNA polymerase I promoter	5 out of 709 genes, 0.7%	68 of 6433 genes, 1.1%	RRN10,PAF1,UTP8,PHO23,CTR9
42255	ribosome assembly	5 out of 709 genes, 0.7%	59 of 6433 genes, 0.9%	LSG1,NSR1,RPF2,DRS1,RSA3
8643	carbohydrate transport	5 out of 709 genes, 0.7%	33 of 6433 genes, 0.5%	HXT6,ASK10,FPS1,GAL2,HXT14
7031	peroxisome organization	5 out of 709 genes, 0.7%	50 of 6433 genes, 0.8%	VPS1,CAF4,SEC39,INP2,PEX11
6413	translational initiation	4 out of 709 genes, 0.6%	61 of 6433 genes, 0.9%	BUD27,RMD9,TIF4631,NIP1
902	cell morphogenesis	4 out of 709 genes, 0.6%	29 of 6433 genes, 0.5%	BEM1,FIG2,SPO14,CDC42
6457	protein folding	4 out of 709 genes, 0.6%	95 of 6433 genes, 1.5%	EMC6,XDJ1,CIN4,SSB2
6383	transcription from RNA polymerase III promoter	4 out of 709 genes, 0.6%	41 of 6433 genes, 0.6%	RPC53,BRF1,RPC37,KNS1
6470	protein dephosphorylation	4 out of 709 genes, 0.6%	49 of 6433 genes, 0.8%	PPS1,PHO13,ESP1,PSY2
43144	snoRNA processing	3 out of 709 genes, 0.4%	45 of 6433 genes, 0.7%	PAF1,PTI1,CTR9
6865	amino acid transport	3 out of 709 genes, 0.4%	42 of 6433 genes, 0.7%	AVT6,AVT3,GAP1
6497	protein lipidation	2 out of 709 genes, 0.3%	45 of 6433 genes, 0.7%	MCD4,ERF2
6414	translational elongation	2 out of 709 genes, 0.3%	334 of 6433 genes, 5.2%	YEF3,SSB2
6766	vitamin metabolic process	2 out of 709 genes, 0.3%	43 of 6433 genes, 0.7%	BIO3,RIB4
6418	tRNA aminoacylation for protein translation	2 out of 709 genes, 0.3%	36 of 6433 genes, 0.6%	VAS1,YHR020W
9311	oligosaccharide metabolic process	1 out of 709 genes, 0.1%	27 of 6433 genes, 0.4%	TSL1
10324	membrane invagination	0 out of 709 genes, 0%	0 of 6433 genes, 0%	none
other	other	35 out of 709 genes, 4.9%		FLO9,IPP1,DUR1,2,DUG2,HMRA1,AAD3,RAM1,AAD4,NVJ3,YAT2,LSB3,IRC6,YGL114W,MDR1,YGR111W,MGA1,DCG1,GYP6,AIM22,APE2,TPO5,SHB17,SRL3,SRL2,SYM1,CAT2,PML39,SEG1,EPO1,RRB1,FDO1,YMR310C,IGO1,FRE4,DSE4

## Sheet: nonconserv_gene_list
Systematic Name	Gene Name	# non_conservative	Feature Type
YHL008C	YHL008C	11	ORF|Verified
YDL243C	AAD4	9	ORF|Verified
YNR065C	YNR065C	9	ORF|Verified
YGL259W	YPS5	7	ORF|Verified
YLR162W	YLR162W	5	ORF|Verified
YDL248W	COS7	4	ORF|Verified
YMR265C	YMR265C	4	ORF|Verified
YNR067C	DSE4	4	ORF|Verified
YBR237W	PRP5	3	ORF|Verified
YBR281C	DUG2	3	ORF|Verified
YDR544C	YDR544C	3	ORF|Verified
YGR257C	MTM1	3	ORF|Verified
YHR022C	YHR022C	3	ORF|Verified
YKL005C	BYE1	3	ORF|Verified
YKL010C	UFD4	3	ORF|Verified
YKL014C	URB1	3	ORF|Verified
YLR023C	IZH3	3	ORF|Verified
YLR084C	RAX2	3	ORF|Verified
YNR069C	BSC5	3	ORF|Verified
YAL063C	FLO9	2	ORF|Verified
YBL005W-A,YBL005W-B	PDR3	2	ORF|Verified
YBR276C	PPS1	2	ORF|Verified
YBR282W	MRPL27	2	ORF|Verified
YDL039C	PRM7	2	ORF|Verified
YER127W	LCP5	2	ORF|Verified
YFL025C	BST1	2	ORF|Verified
YGL062W	PYC1	2	ORF|Verified
YGL096W	TOS8	2	ORF|Verified
YGL102C	YGL102C	2	ORF|Verified
YGR127W	YGR127W	2	ORF|Verified
YHL009C	YAP3	2	ORF|Verified
YHL030W	ECM29	2	ORF|Verified
YIL045W	PIG2	2	ORF|Verified
YJR128W	YJR128W	2	ORF|Verified
YJR140C	HIR3	2	ORF|Verified
YKL161C	KDX1	2	ORF|Verified
YKL176C	LST4	2	ORF|Verified
YKR022C	NTR2	2	ORF|Verified
YKR023W	YKR023W	2	ORF|Verified
YKR050W	TRK2	2	ORF|Verified
YKR098C	UBP11	2	ORF|Verified
YLL007C	LMO1	2	ORF|Verified
YLL013C	PUF3	2	ORF|Verified
YLR086W	SMC4	2	ORF|Verified
YLR227C	ADY4	2	ORF|Verified
YLR235C	YLR235C	2	ORF|Verified
YLR252W	YLR252W	2	ORF|Verified
YLR263W	RED1	2	ORF|Verified
YLR265C	NEJ1	2	ORF|Verified
YLR434C	YLR434C	2	ORF|Verified
YLR466W	YRF1-4	2	ORF|Verified
YMR086W	SEG1	2	ORF|Verified
YMR151W	YIM2	2	ORF|Verified
YMR164C	MSS11	2	ORF|Verified
YMR326C	YMR326C	2	ORF|Verified
YNL095C	YNL095C	2	ORF|Verified
YNR061C	YNR061C	2	ORF|Verified
YNR064C	YNR064C	2	ORF|Verified
YOL138C	RTC1	2	ORF|Verified
YOR017W	PET127	2	ORF|Verified
Q0115	BI3	1	ORF|Verified
YAL004W	YAL004W	1	ORF|Dubious
YBL029W	YBL029W	1	ORF|Uncharacterized
YBR137W	YBR137W	1	ORF|Verified
YBR201C-A	YBR201C-A	1	ORF|Uncharacterized
YBR214W	SDS24	1	ORF|Verified
YBR235W	VHC1	1	ORF|Verified
YBR236C	ABD1	1	ORF|Verified
YBR275C	RIF1	1	ORF|Verified
YBR277C	YBR277C	1	ORF|Dubious
YCR024C-B	YCR024C-B	1	ORF|Uncharacterized
YCR084C	TUP1	1	ORF|Verified
YCR088W	ABP1	1	ORF|Verified
YDL027C	MRX9	1	ORF|Uncharacterized
YDL040C	NAT1	1	ORF|Verified
YDL041W	YDL041W	1	ORF|Dubious
YDL050C	YDL050C	1	ORF|Dubious
YDL149W	ATG9	1	ORF|Verified
YDL151C	BUD30	1	ORF|Dubious
YDL152W	YDL152W	1	ORF|Dubious
YDL157C	YDL157C	1	ORF|Uncharacterized
YDL237W	AIM6	1	ORF|Verified
YDR040C	ENA1	1	ORF|Verified
YDR097C	MSH6	1	ORF|Verified
YDR104C	SPO71	1	ORF|Verified
YDR106W	ARP10	1	ORF|Verified
YDR471W	RPL27B	1	ORF|Verified
YER024W	YAT2	1	ORF|Verified
YER069W	ARG5,6	1	ORF|Verified
YER120W	SCS2	1	ORF|Verified
YER122C	GLO3	1	ORF|Verified
YER123W	YCK3	1	ORF|Verified
YER130C	COM2	1	ORF|Verified
YFL023W	BUD27	1	ORF|Verified
YFR020W	CSS2	1	ORF|Verified
YFR025C	HIS2	1	ORF|Verified
YFR042W	KEG1	1	ORF|Verified
YGL026C	TRP5	1	ORF|Verified
YGL095C	VPS45	1	ORF|Verified
YGL097W	SRM1	1	ORF|Verified
YGL107C	RMD9	1	ORF|Verified
YGL114W	YGL114W	1	ORF|Verified
YGL258W-A	YGL258W-A	1	ORF|Verified
YGR052W	FMP48	1	ORF|Verified
YGR087C	PDC6	1	ORF|Verified
YGR088W	CTT1	1	ORF|Verified
YGR097W	ASK10	1	ORF|Verified
YGR099W	TEL2	1	ORF|Verified
YGR110W	CLD1	1	ORF|Verified
YGR122W	YGR122W	1	ORF|Verified
YGR125W	YGR125W	1	ORF|Verified
YGR128C	UTP8	1	ORF|Verified
YGR160W	YGR160W	1	ORF|Verified
YGR246C	BRF1	1	ORF|Verified
YGR250C	RIE1	1	ORF|Verified
YHL005C	YHL005C	1	ORF|Verified
YHL014C	YLF2	1	ORF|Verified
YHL015W-A	YHL015W-A	1	ORF|Verified
YHL016C	DUR3	1	ORF|Verified
YHL032C	GUT1	1	ORF|Verified
YHR014W	SPO13	1	ORF|Verified
YHR017W	YSC83	1	ORF|Verified
YHR021W-A	ECM12	1	ORF|Verified
YHR023W	MYO1	1	ORF|Verified
YIL017C	VID28	1	ORF|Verified
YIL047C	SYG1	1	ORF|Verified
YIR030C	DCG1	1	ORF|Verified
YJL042W	MHP1	1	ORF|Verified
YJL043W	YJL043W	1	ORF|Verified
YJL044C	GYP6	1	ORF|Verified
YJL113W	MDV1	1	ORF|Verified
YKL015W	PUT3	1	ORF|Verified
YKL116C	PRR1	1	ORF|Verified
YKL135C	APL2	1	ORF|Verified
YKL136W	YKL136W	1	ORF|Verified
YKL140W	TGL1	1	ORF|Verified
YKL147C	YKL147C	1	ORF|Verified
YKL153W	YKL153W	1	ORF|Verified
YKL162C	YKL162C	1	ORF|Verified
YKL167C	MRP49	1	ORF|Verified
YKL175W	ZRT3	1	ORF|Verified
YKL179C	COY1	1	ORF|Verified
YKR004C	ECM9	1	ORF|Verified
YKR005C	YKR005C	1	ORF|Verified
YKR027W	BCH2	1	ORF|Verified
YKR039W	GAP1	1	ORF|Verified
YKR044W	UIP5	1	ORF|Verified
YKR054C	DYN1	1	ORF|Verified
YKR056W	TRM2	1	ORF|Verified
YKR058W	GLG1	1	ORF|Verified
YKR069W	MET1	1	ORF|Verified
YKR082W	NUP133	1	ORF|Verified
YKR084C	HBS1	1	ORF|Verified
YKR086W	PRP16	1	ORF|Verified
YKR090W	PXL1	1	ORF|Verified
YLL008W	DRS1	1	ORF|Verified
YLR001C	YLR001C	1	ORF|Verified
YLR002C	NOC3	1	ORF|Verified
YLR006C	SSK1	1	ORF|Verified
YLR014C	PPR1	1	ORF|Verified
YLR035C-A	MLH2	1	ORF|Verified
YLR080W	EMP46	1	ORF|Verified
YLR223C	IFH1	1	ORF|Verified
YLR224W	UCC1	1	ORF|Verified
YLR232W	YLR232W	1	ORF|Verified
YLR233C	EST1	1	ORF|Verified
YLR236C	YLR236C	1	ORF|Verified
YLR247C	IRC20	1	ORF|Verified
YLR248W	RCK2	1	ORF|Verified
YLR256W	HAP1	1	ORF|Verified
YLR337C	VRP1	1	ORF|Verified
YLR435W	TSR2	1	ORF|Verified
YLR440C	SEC39	1	ORF|Verified
YML039W	YMD8	1	ORF|Verified
YML100W	TSL1	1	ORF|Verified
YML100W-A	YML100W-A	1	ORF|Verified
YML103C	NUP188	1	ORF|Verified
YML104C	MDM1	1	ORF|Verified
YML107C	PML39	1	ORF|Verified
YML109W	ZDS2	1	ORF|Verified
YML110C	COQ5	1	ORF|Verified
YMR016C	SOK2	1	ORF|Verified
YMR027W	YMR027W	1	ORF|Verified
YMR128W	ECM16	1	ORF|Verified
YMR129W	POM152	1	ORF|Verified
YMR135W-A	YMR135W-A	1	ORF|Verified
YMR140W	SIP5	1	ORF|Verified
YMR152W	YIM1	1	ORF|Verified
YMR153W	NUP53	1	ORF|Verified
YMR155W	YMR155W	1	ORF|Verified
YMR158W-B	YMR158W-B	1	ORF|Verified
YMR163C	INP2	1	ORF|Verified
YMR317W	YMR317W	1	ORF|Verified
YMR320W	YMR320W	1	ORF|Verified
YNL078W	NIS1	1	ORF|Verified
YNL083W	SAL1	1	ORF|Verified
YNL090W	RHO2	1	ORF|Verified
YNL091W	NST1	1	ORF|Verified
YNL092W	YNL092W	1	ORF|Verified
YNL132W	KRE33	1	ORF|Verified
YNL201C	PSY2	1	ORF|Verified
YNL203C	YNL203C	1	ORF|Verified
YNL204C	SPS18	1	ORF|Verified
YNL205C	YNL205C	1	ORF|Verified
YNL206C	RTT106	1	ORF|Verified
YNL242W	ATG2	1	ORF|Verified
YNL283C	WSC2	1	ORF|Verified
YNL285W	YNL285W	1	ORF|Verified
YNL303W	YNL303W	1	ORF|Verified
YNR063W	YNR063W	1	ORF|Verified
YNR066C	YNR066C	1	ORF|Verified
YNR075C-A	YNR075C-A	1	ORF|Verified
YNR075W	COS10	1	ORF|Verified
YOL144W	NOP8	1	ORF|Verified
YOL145C	CTR9	1	ORF|Verified
YOR112W	CEX1	1	ORF|Verified
YOR128C	ADE2	1	ORF|Verified
YPL062W	YPL062W	1	ORF|Verified
YPL084W	BRO1	1	ORF|Verified
YPL188W	POS5	1	ORF|Verified

## Sheet: go_slim_genes_nonconserv
GOID	GO term	Frequency	Genome Frequency	Gene(s)
8150	biological process unknown	68 out of 219 genes, 31.1%	1133 of 6433 genes, 17.6%	YAL004W,YBL029W,YBR201C-A,YBR277C,YCR024C-B,MRX9,YDL041W,YDL050C,YDL152W,YDL157C,AIM6,YDR544C,COM2,CSS2,TOS8,YGL102C,YGL258W-A,YPS5,YGR125W,YGR127W,YGR160W,RIE1,YHL005C,YLF2,YHL015W-A,YSC83,ECM12,YHR022C,YJL043W,YJR128W,YKL136W,YKL147C,YKL153W,KDX1,YKL162C,ECM9,YKR005C,YKR023W,UIP5,UBP11,YLR001C,YLR162W,YLR232W,YLR236C,YLR252W,YLR434C,YML100W-A,YMR027W,YMR135W-A,YIM2,YMR155W,YMR158W-B,YMR265C,YMR…
6366	transcription from RNA polymerase II promoter	16 out of 219 genes, 7.3%	476 of 6433 genes, 7.4%	TUP1,BUD30,YGR122W,YAP3,VID28,HIR3,BYE1,PUT3,PRR1,NUP133,PPR1,IFH1,HAP1,MSS11,RTT106,CTR9
33043	regulation of organelle organization	13 out of 219 genes, 5.9%	283 of 6433 genes, 4.4%	ABP1,VPS45,SPO13,MHP1,HIR3,SSK1,EST1,RCK2,RED1,NUP53,NIS1,PSY2,CTR9
6974	cellular response to DNA damage stimulus	12 out of 219 genes, 5.5%	307 of 6433 genes, 4.8%	RIF1,TUP1,MSH6,BUD27,TRM2,NUP133,YLR235C,IRC20,NEJ1,YIM1,PSY2,CTR9
42221	response to chemical	12 out of 219 genes, 5.5%	446 of 6433 genes, 6.9%	TUP1,BST1,CTT1,ASK10,PRR1,UCC1,RCK2,HAP1,PSY2,YNR064C,BRO1,POS5
6605	protein targeting	12 out of 219 genes, 5.5%	307 of 6433 genes, 4.8%	YBR137W,ATG9,COS7,SCS2,VPS45,NUP133,NUP188,POM152,NUP53,ATG2,COS10,BRO1
278	mitotic cell cycle	11 out of 219 genes, 5.0%	319 of 6433 genes, 5%	BUD30,ARP10,HIR3,DYN1,RAX2,SMC4,VRP1,ZDS2,NUP53,NIS1,CTR9
23052	signaling	11 out of 219 genes, 5.0%	245 of 6433 genes, 3.8%	PPS1,SYG1,LST4,PXL1,LMO1,SSK1,RCK2,RHO2,PSY2,WSC2,RTC1
48285	organelle fission	10 out of 219 genes, 4.6%	302 of 6433 genes, 4.7%	MSH6,ARP10,SPO13,DYN1,SMC4,RCK2,RED1,NUP53,NIS1,PSY2
5975	carbohydrate metabolic process	9 out of 219 genes, 4.1%	198 of 6433 genes, 3.1%	KEG1,PYC1,GUT1,VID28,PIG2,BCH2,GLG1,TSL1,MSS11
6281	DNA repair	9 out of 219 genes, 4.1%	256 of 6433 genes, 4%	RIF1,MSH6,BUD27,TRM2,NUP133,IRC20,NEJ1,PSY2,CTR9
6325	chromatin organization	9 out of 219 genes, 4.1%	318 of 6433 genes, 4.9%	RIF1,TUP1,SCS2,HIR3,NUP133,IFH1,ZDS2,RTT106,CTR9
51321	meiotic cell cycle	9 out of 219 genes, 4.1%	282 of 6433 genes, 4.4%	BUD30,MSH6,SPO71,SPO13,VID28,SMC4,RCK2,RED1,PSY2
7010	cytoskeleton organization	8 out of 219 genes, 3.7%	238 of 6433 genes, 3.7%	ABP1,MYO1,MHP1,DYN1,SSK1,VRP1,POM152,RHO2
51726	regulation of cell cycle	8 out of 219 genes, 3.7%	233 of 6433 genes, 3.6%	SPO13,RCK2,RED1,VRP1,ZDS2,NUP53,NIS1,PSY2
51169	nuclear transport	8 out of 219 genes, 3.7%	181 of 6433 genes, 2.8%	SCS2,SRM1,UTP8,NUP133,NUP188,POM152,NUP53,CEX1
6811	ion transport	8 out of 219 genes, 3.7%	263 of 6433 genes, 4.1%	ENA1,MTM1,YHL008C,DUR3,ZRT3,GAP1,SAL1,BRO1
6364	rRNA processing	8 out of 219 genes, 3.7%	311 of 6433 genes, 4.8%	LCP5,UTP8,URB1,DRS1,NOC3,TSR2,ECM16,NOP8
48193	Golgi vesicle transport	8 out of 219 genes, 3.7%	191 of 6433 genes, 3%	GLO3,BST1,VPS45,APL2,COY1,BCH2,EMP46,SEC39
6468	protein phosphorylation	7 out of 219 genes, 3.2%	197 of 6433 genes, 3.1%	PPS1,YCK3,FMP48,PRR1,SSK1,RCK2,CTR9
70271	protein complex biogenesis	7 out of 219 genes, 3.2%	293 of 6433 genes, 4.6%	ABP1,ATG9,BUD27,VPS45,ECM29,UFD4,CTR9
15931	nucleobase-containing compound transport	7 out of 219 genes, 3.2%	143 of 6433 genes, 2.2%	SRM1,UTP8,NUP133,NUP188,SAL1,CEX1,BRO1
6091	generation of precursor metabolites and energy	6 out of 219 genes, 2.7%	154 of 6433 genes, 2.4%	RMD9,PIG2,GLG1,PUF3,HAP1,COQ5
7005	mitochondrion organization	6 out of 219 genes, 2.7%	265 of 6433 genes, 4.1%	ATG9,LMO1,PUF3,MDM1,ATG2,PET127
51603	proteolysis involved in cellular protein catabolic process	6 out of 219 genes, 2.7%	216 of 6433 genes, 3.4%	COS7,BST1,VID28,UCC1,COS10,BRO1
6397	mRNA processing	5 out of 219 genes, 2.3%	170 of 6433 genes, 2.6%	ABD1,PRP5,NTR2,PRP16,CTR9
42274	ribosomal small subunit biogenesis	5 out of 219 genes, 2.3%	135 of 6433 genes, 2.1%	LCP5,UTP8,TSR2,ECM16,KRE33
31399	regulation of protein modification process	5 out of 219 genes, 2.3%	111 of 6433 genes, 1.7%	PPS1,HIR3,SSK1,NUP53,CTR9
6997	nucleus organization	5 out of 219 genes, 2.3%	66 of 6433 genes, 1.0%	NUP133,NUP188,MDM1,POM152,NUP53
6520	cellular amino acid metabolic process	5 out of 219 genes, 2.3%	199 of 6433 genes, 3.1%	ARG5,6,HIS2,TRP5,PDC6,PUT3
6629	lipid metabolic process	5 out of 219 genes, 2.3%	296 of 6433 genes, 4.6%	TUP1,SCS2,BST1,CLD1,TGL1
6260	DNA replication	5 out of 219 genes, 2.3%	139 of 6433 genes, 2.2%	RIF1,PPS1,MSH6,NOC3,SMC4
6970	response to osmotic stress	5 out of 219 genes, 2.3%	92 of 6433 genes, 1.4%	ENA1,CTT1,SSK1,RCK2,NST1
71554	cell wall organization or biogenesis	5 out of 219 genes, 2.3%	198 of 6433 genes, 3.1%	SPO71,MHP1,BCH2,RHO2,WSC2
51052	regulation of DNA metabolic process	5 out of 219 genes, 2.3%	107 of 6433 genes, 1.7%	MSH6,UFD4,EST1,PSY2,CTR9
43934	sporulation	5 out of 219 genes, 2.3%	133 of 6433 genes, 2.1%	BUD30,SPO71,VID28,ADY4,SPS18
8380	RNA splicing	4 out of 219 genes, 1.8%	144 of 6433 genes, 2.2%	BI3,PRP5,NTR2,PRP16
16197	endosomal transport	4 out of 219 genes, 1.8%	102 of 6433 genes, 1.6%	COS7,VPS45,COS10,BRO1
6979	response to oxidative stress	4 out of 219 genes, 1.8%	105 of 6433 genes, 1.6%	CTT1,ASK10,RCK2,POS5
32196	transposition	4 out of 219 genes, 1.8%	110 of 6433 genes, 1.7%	BRF1,YJL113W,YLR035C-A,YML039W
48308	organelle inheritance	4 out of 219 genes, 1.8%	60 of 6433 genes, 0.9%	SCS2,VPS45,MDM1,INP2
6873	cellular ion homeostasis	4 out of 219 genes, 1.8%	128 of 6433 genes, 2%	VPS45,ZRT3,TRK2,IZH3
910	cytokinesis	4 out of 219 genes, 1.8%	84 of 6433 genes, 1.3%	BUD30,MYO1,RAX2,VRP1
45333	cellular respiration	4 out of 219 genes, 1.8%	83 of 6433 genes, 1.3%	RMD9,PUF3,HAP1,COQ5
7059	chromosome segregation	4 out of 219 genes, 1.8%	203 of 6433 genes, 3.2%	SPO13,DYN1,SMC4,RED1
16050	vesicle organization	4 out of 219 genes, 1.8%	81 of 6433 genes, 1.3%	GLO3,BST1,VPS45,BRO1
51049	regulation of transport	4 out of 219 genes, 1.8%	85 of 6433 genes, 1.3%	TUP1,SCS2,VPS45,ASK10
70647	protein modification by small protein conjugation or removal	4 out of 219 genes, 1.8%	170 of 6433 genes, 2.6%	UFD4,NUP53,CTR9,BRO1
32200	telomere organization	4 out of 219 genes, 1.8%	78 of 6433 genes, 1.2%	RIF1,TEL2,EST1,YRF1-4
6401	RNA catabolic process	3 out of 219 genes, 1.4%	132 of 6433 genes, 2.1%	YGR122W,HBS1,PUF3
6310	DNA recombination	3 out of 219 genes, 1.4%	185 of 6433 genes, 2.9%	BUD27,IRC20,YRF1-4
70925	organelle assembly	3 out of 219 genes, 1.4%	135 of 6433 genes, 2.1%	ATG9,DRS1,ATG2
18193	peptidyl-amino acid modification	3 out of 219 genes, 1.4%	151 of 6433 genes, 2.3%	HIR3,NUP53,CTR9
7033	vacuole organization	3 out of 219 genes, 1.4%	88 of 6433 genes, 1.4%	ATG9,VPS45,ATG2
51186	cofactor metabolic process	3 out of 219 genes, 1.4%	179 of 6433 genes, 2.8%	MET1,COQ5,POS5
6354	DNA-templated transcription, elongation	3 out of 219 genes, 1.4%	97 of 6433 genes, 1.5%	HIR3,RTT106,CTR9
55086	nucleobase-containing small molecule metabolic process	3 out of 219 genes, 1.4%	198 of 6433 genes, 3.1%	PPR1,ADE2,POS5
9408	response to heat	3 out of 219 genes, 1.4%	73 of 6433 genes, 1.1%	NUP133,NUP188,WSC2
6897	endocytosis	3 out of 219 genes, 1.4%	97 of 6433 genes, 1.5%	SDS24,VRP1,COS10
42273	ribosomal large subunit biogenesis	3 out of 219 genes, 1.4%	104 of 6433 genes, 1.6%	URB1,DRS1,NOP8
6413	translational initiation	2 out of 219 genes, 0.9%	61 of 6433 genes, 0.9%	BUD27,RMD9
6352	DNA-templated transcription, initiation	2 out of 219 genes, 0.9%	73 of 6433 genes, 1.1%	BRF1,CTR9
55085	transmembrane transport	2 out of 219 genes, 0.9%	234 of 6433 genes, 3.6%	VHC1,ENA1
746	conjugation	2 out of 219 genes, 0.9%	124 of 6433 genes, 1.9%	PRM7,PRR1
16570	histone modification	2 out of 219 genes, 0.9%	114 of 6433 genes, 1.8%	HIR3,CTR9
42594	response to starvation	2 out of 219 genes, 0.9%	56 of 6433 genes, 0.9%	ENA1,SIP5
6360	transcription from RNA polymerase I promoter	2 out of 219 genes, 0.9%	68 of 6433 genes, 1.1%	UTP8,CTR9
8213	protein alkylation	2 out of 219 genes, 0.9%	50 of 6433 genes, 0.8%	YNL092W,CTR9
32543	mitochondrial translation	2 out of 219 genes, 0.9%	167 of 6433 genes, 2.6%	MRPL27,MRP49
7124	pseudohyphal growth	2 out of 219 genes, 0.9%	74 of 6433 genes, 1.2%	SOK2,MSS11
6470	protein dephosphorylation	2 out of 219 genes, 0.9%	49 of 6433 genes, 0.8%	PPS1,PSY2
43543	protein acylation	2 out of 219 genes, 0.9%	66 of 6433 genes, 1.0%	NAT1,HIR3
1403	invasive growth in response to glucose limitation	2 out of 219 genes, 0.9%	59 of 6433 genes, 0.9%	TUP1,MSS11
7031	peroxisome organization	2 out of 219 genes, 0.9%	50 of 6433 genes, 0.8%	SEC39,INP2
9451	RNA modification	1 out of 219 genes, 0.5%	172 of 6433 genes, 2.7%	TRM2
6353	DNA-templated transcription, termination	1 out of 219 genes, 0.5%	43 of 6433 genes, 0.7%	CTR9
6869	lipid transport	1 out of 219 genes, 0.5%	68 of 6433 genes, 1.1%	SCS2
7114	cell budding	1 out of 219 genes, 0.5%	58 of 6433 genes, 0.9%	VRP1
43144	snoRNA processing	1 out of 219 genes, 0.5%	45 of 6433 genes, 0.7%	CTR9
54	ribosomal subunit export from nucleus	1 out of 219 genes, 0.5%	46 of 6433 genes, 0.7%	SRM1
6383	transcription from RNA polymerase III promoter	1 out of 219 genes, 0.5%	41 of 6433 genes, 0.6%	BRF1
42255	ribosome assembly	1 out of 219 genes, 0.5%	59 of 6433 genes, 0.9%	DRS1
32787	monocarboxylic acid metabolic process	1 out of 219 genes, 0.5%	140 of 6433 genes, 2.2%	TUP1
9311	oligosaccharide metabolic process	1 out of 219 genes, 0.5%	27 of 6433 genes, 0.4%	TSL1
8033	tRNA processing	1 out of 219 genes, 0.5%	109 of 6433 genes, 1.7%	TRM2
8643	carbohydrate transport	1 out of 219 genes, 0.5%	33 of 6433 genes, 0.5%	ASK10
2181	cytoplasmic translation	1 out of 219 genes, 0.5%	180 of 6433 genes, 2.8%	RPL27B
6865	amino acid transport	1 out of 219 genes, 0.5%	42 of 6433 genes, 0.7%	GAP1
6417	regulation of translation	1 out of 219 genes, 0.5%	105 of 6433 genes, 1.6%	HBS1
48284	organelle fusion	1 out of 219 genes, 0.5%	89 of 6433 genes, 1.4%	VPS45
61025	membrane fusion	1 out of 219 genes, 0.5%	76 of 6433 genes, 1.2%	VPS45
6887	exocytosis	0 out of 219 genes, 0%	49 of 6433 genes, 0.8%	none
6486	protein glycosylation	0 out of 219 genes, 0%	62 of 6433 genes, 1%	none
51604	protein maturation	0 out of 219 genes, 0%	52 of 6433 genes, 0.8%	none
902	cell morphogenesis	0 out of 219 genes, 0%	29 of 6433 genes, 0.5%	none
6457	protein folding	0 out of 219 genes, 0%	95 of 6433 genes, 1.5%	none
10324	membrane invagination	0 out of 219 genes, 0%	0 of 6433 genes, 0%	none
6418	tRNA aminoacylation for protein translation	0 out of 219 genes, 0%	36 of 6433 genes, 0.6%	none
6414	translational elongation	0 out of 219 genes, 0%	334 of 6433 genes, 5.2%	none
6766	vitamin metabolic process	0 out of 219 genes, 0%	43 of 6433 genes, 0.7%	none
6497	protein lipidation	0 out of 219 genes, 0%	45 of 6433 genes, 0.7%	none
other	other	10 out of 219 genes, 4.6%		FLO9,DUG2,AAD4,YAT2,YGL114W,DCG1,GYP6,PML39,SEG1,DSE4
