# Supplementary material for: Whole-Genome Sequence and Variant Analysis of W303, a Widely-Used Strain of Saccharomyces cerevisiae
Source: Oxford University Press journal article supplement (doi:10.1534/g3.117.040022), 2017-06-06
Supplement: 040022_files2.xlsx [file 040022_files2.xlsx]

## Sheet: msh2-null
#CHROM	POS	REF	ALT	QUAL	GT	GQ	DP	RA	QR	AA	QA	GL	TYPE
Seq16_pilon	819422	GA	G	179.458	1	50000	10	6	223	4	415	-38.3875,-20.4417	indel
Seq14_pilon	13404	CT	C	188.92	1	50000	15	10	308	5	510	-46.92,-28.028	indel
Seq10_pilon	717281	C	CT	190.284	1	50000	19	12	406	6	611	-92.095,-58.3314,-39.3031	indel
Seq13_pilon	698989	T	TA	192.617	1	50000	18	10	334	6	543	-88.0518,-60.7725,-41.5108	indel
Seq4_pilon	287031	CT	C	193.513	1	50000	13	8	287	5	495	-45.54,-26.1888	indel
Seq16_pilon	791158	CA	C	195.068	1	50000	11	7	249	4	457	-42.2725,-22.7657	indel
Seq15_pilon	890838	TA	T	213.286	1	50000	25	15	491	8	723	-109.788,-68.978,-47.6494	indel
Seq3_pilon	277758	GT	G	215.174	1	50000	17	10	373	6	606	-88.7219,-59.0629,-37.5455	indel
Seq16_pilon	467355	CT	C	215.251	1	50000	11	6	215	4	447	-60.242,-50.508,-28.9829	indel
Seq13_pilon	776796	A	AT	218.169	1	50000	14	9	325	5	559	-51.428,-29.6111	indel
Seq15_pilon	582095	C	CA	230.053	1	50000	24	14	458	9	709	-105.537,-67.704,-44.6987	indel
Seq1_pilon	127554	CT	C	238.608	1	50000	24	15	441	7	700	-106.894,-69.4267,-45.5659	indel
Seq11_pilon	343257	GA	G	242.273	1	50000	13	8	287	5	548	-50.416,-26.1888	indel
Seq2_pilon	253392	CT	C	243.037	1	50000	16	10	293	6	556	-50.9667,-26.663	indel
Seq2_pilon	446668	AT	A	243.167	1	50000	17	11	396	6	658	-60.3167,-36	indel
Seq15_pilon	878185	TA	T	253.296	1	50000	14	8	291	6	566	-51.8833,-26.5538	indel
Seq5_pilon	408703	GA	G	253.916	1	50000	17	10	367	7	643	-58.7886,-33.397	indel
Seq11_pilon	470625	AT	A	253.922	1	50000	15	9	331	6	606	-55.55,-30.1578	indel
Seq2_pilon	302216	A	AT	266.587	1	50000	16	9	306	6	596	-81.7813,-57.3257,-30.667	indel
Seq14_pilon	500096	GT	G	268.989	1	50000	12	7	222	5	513	-47.196,-20.2971	indel
Seq5_pilon	73835	CT	C	274.463	1	50000	14	8	311	6	609	-55.825,-28.3788	indel
Seq5_pilon	118074	C	T	283.599	1	50000	40	15	536	23	851	-125.195,-84.2528,-55.8929	snp
Seq15_pilon	896852	AT	A	293.395	1	50000	25	15	545	8	864	-127.423,-97.643,-68.3035	indel
Seq13_pilon	542288	A	G	307.733	1	50000	12	0	0	10	342	-33.8182,-37.4233,-6.65	snp
Seq4_pilon	1270720	CT	C	308.027	1	50000	11	6	224	5	558	-51.336,-20.5333	indel
Seq8_pilon	263939	GA	G	310.733	1	50000	15	9	327	6	664	-60.8667,-29.7933	indel
Seq12_pilon	194635	CT	C	312.027	1	50000	25	15	515	10	856	-77.896,-46.6933	indel
Seq12_pilon	629366	GA	G	316.48	1	50000	10	5	185	5	529	-48.668,-17.02	indel
Seq8_pilon	290598	CT	C	318.32	1	50000	10	5	192	5	538	-49.496,-17.664	indel
Seq10_pilon	208894	GA	G	324.198	1	50000	13	7	258	6	611	-56.0083,-23.5886	indel
Seq15_pilon	145451	CT	C	325.417	1	50000	12	6	239	6	594	-54.45,-21.9083	indel
Seq8_pilon	559789	TA	T	328.229	1	50000	14	7	258	7	617	-56.4114,-23.5886	indel
Seq8_pilon	169108	GA	G	330.831	1	50000	18	11	325	7	685	-62.6286,-29.5455	indel
Seq4_pilon	1088251	GA	G	340.633	1	50000	13	7	231	6	602	-55.1833,-21.12	indel
Seq3_pilon	326970	C	CT	341.32	1	50000	10	5	173	5	544	-50.048,-15.916	indel
Seq4_pilon	541679	T	C	341.818	1	50000	11	0	0	11	376	-34.1818,0	snp
Seq4_pilon	212557	GT	G	342.962	1	50000	16	9	321	7	695	-63.5429,-29.2467	indel
Seq6_pilon	61701	GT	G	345.644	1	50000	23	14	543	9	920	-83.8222,-49.2579	indel
Seq6_pilon	181289	CT	C	362.514	1	50000	12	5	168	6	565	-66.6364,-53.8514,-17.6	indel
Seq14_pilon	683908	CA	C	367.145	1	50000	15	8	289	7	690	-63.0857,-26.3713	indel
Seq9_pilon	247661	C	CA	372.813	1	50000	26	17	555	9	961	-87.5578,-50.2765	indel
Seq10_pilon	366890	GA	G	373.555	1	50000	15	8	295	7	703	-64.2743,-26.9188	indel
Seq3_pilon	214772	C	A	386.677	1	50000	13	0	0	13	426	-38.6677,0	snp
Seq11_pilon	230778	G	A	390.583	1	50000	12	0	0	12	430	-39.0583,0	snp
Seq10_pilon	316807	GA	G	400.969	1	50000	21	13	459	8	896	-81.76,-41.6631	indel
Seq12_pilon	94407	TA	T	402.821	1	50000	15	8	300	7	740	-67.6571,-27.375	indel
Seq5_pilon	512732	GA	G	405.943	1	50000	14	7	264	7	708	-64.7314,-24.1371	indel
Seq2_pilon	265412	CT	C	411.1	1	50000	19	11	407	8	856	-78.11,-37	indel
Seq3_pilon	56723	CA	C	411.266	1	50000	17	9	141	6	591	-66.368,-58.2175,-17.0909	indel
Seq12_pilon	335598	GA	G	412.458	1	50000	18	10	368	8	819	-74.7338,-33.488	indel
Seq14_pilon	475960	A	G	429.807	1	50000	15	1	41	14	519	-47.0807,-4.1	snp
Seq7_pilon	437077	CA	C	430.91	1	50000	27	15	540	11	1013	-140.367,-98.2817,-55.1906	indel
Seq13_pilon	757907	T	TA	437.029	1	50000	14	7	256	7	734	-67.1086,-23.4057	indel
Seq7_pilon	606851	GA	G	440.713	1	50000	18	10	355	8	837	-76.3763,-32.305	indel
Seq6_pilon	111801	CA	C	442.591	1	50000	22	13	472	9	956	-87.1022,-42.8431	indel
Seq13_pilon	739337	T	C	446.283	1	50000	15	0	0	13	496	-48.4414,-52.1333,-7.505	snp
Seq13_pilon	627067	GA	G	447.086	1	50000	14	7	260	7	749	-68.48,-23.7714	indel
Seq14_pilon	736827	CA	C	449.4	1	50000	15	7	259	8	752	-68.62,-23.68	indel
Seq5_pilon	59735	CT	C	451.269	1	50000	29	15	419	9	915	-134.542,-101.146,-56.0195	indel
Seq13_pilon	406580	TA	T	453.36	1	50000	12	5	182	7	679	-62.08,-16.744	indel
Seq13_pilon	922511	GT	G	464.457	1	50000	14	7	176	7	684	-62.5371,-16.0914	indel
Seq16_pilon	107809	GT	G	471.222	1	50000	22	12	451	10	968	-88.088,-40.9658	indel
Seq16_pilon	76175	AT	A	475.469	1	50000	35	21	741	13	1263	-180.949,-115.116,-67.5695	indel
Seq7_pilon	101852	G	T	478.064	1	50000	14	0	0	14	527	-47.8064,0	snp
Seq8_pilon	64636	CT	C	479.063	1	50000	16	8	306	8	831	-75.8288,-27.9225	indel
Seq13_pilon	235079	A	AT	483.527	1	50000	31	19	627	11	1157	-161.155,-105.639,-57.2865	indel
Seq8_pilon	117498	GA	G	483.657	1	50000	14	7	264	7	793	-72.5029,-24.1371	indel
Seq13_pilon	922478	CT	C	486.363	1	50000	16	8	256	8	789	-71.9963,-23.36	indel
Seq7_pilon	346095	CA	C	490.874	1	50000	22	13	470	9	1007	-91.7489,-42.6615	indel
Seq9_pilon	194916	TA	T	500.377	1	50000	33	21	731	12	1279	-116.176,-66.1381	indel
Seq16_pilon	757500	GA	G	502.794	1	50000	20	11	382	9	933	-85.0067,-34.7273	indel
Seq4_pilon	692282	GA	G	506.417	1	50000	12	5	177	7	732	-66.9257,-16.284	indel
Seq7_pilon	1049693	GT	G	512.703	1	50000	12	5	197	7	759	-69.3943,-18.124	indel
Seq8_pilon	48318	GA	G	520.621	1	50000	35	22	740	13	1311	-118.998,-66.9364	indel
Seq10_pilon	124527	GA	G	521.739	1	50000	11	4	115	7	687	-62.8114,-10.6375	indel
Seq4_pilon	1500459	CT	C	525.577	1	50000	12	5	184	7	760	-69.4857,-16.928	indel
Seq7_pilon	968998	CT	C	526.127	1	50000	19	10	374	9	951	-86.6467,-34.034	indel
Seq7_pilon	608638	C	CA	539.556	1	50000	26	15	567	11	1159	-105.364,-51.408	indel
Seq9_pilon	328404	AT	A	541.113	1	50000	16	8	291	8	884	-80.665,-26.5538	indel
Seq15_pilon	826281	G	A	542.85	1	50000	18	0	0	16	603	-57.4329,-61.125,-6.84	snp
Seq2_pilon	802120	AT	A	549.288	1	50000	14	6	228	8	831	-75.8288,-20.9	indel
Seq5_pilon	307011	CA	C	554.917	1	50000	26	14	490	11	1100	-143.736,-100.825,-45.3333	indel
Seq9_pilon	58721	G	GT	558.51	1	50000	22	11	393	10	1007	-126.667,-95.1818,-39.3308	indel
Seq5_pilon	275466	GA	G	558.611	1	50000	12	5	163	7	775	-70.8571,-14.996	indel
Seq16_pilon	768256	A	G	559.156	1	50000	16	0	0	16	617	-55.9156,0	snp
Seq15_pilon	319477	C	T	566.176	1	50000	17	0	0	17	625	-56.6176,0	snp
Seq2_pilon	496673	C	CA	566.964	1	50000	26	12	455	12	1080	-138.79,-104.775,-48.0786	indel
Seq15_pilon	572596	GT	G	577.769	1	50000	31	18	648	13	1283	-116.457,-58.68	indel
Seq14_pilon	481189	T	A	586.509	1	50000	34	8	219	26	870	-78.6346,-19.9838	snp
Seq16_pilon	45047	T	TA	592.041	1	50000	18	8	294	9	945	-112.239,-89.453,-30.2489	indel
Seq3_pilon	100174	G	T	597.474	1	50000	19	0	0	19	660	-59.7474,0	snp
Seq4_pilon	273901	TC	T	601.79	1	50000	13	5	183	8	844	-77.015,-16.836	indel
Seq13_pilon	56997	G	GA	602.775	1	50000	17	8	274	9	936	-85.28,-25.0025	indel
Seq13_pilon	85391	A	AT	608.65	1	50000	12	4	145	8	814	-74.2775,-13.4125	indel
Seq7_pilon	947234	GA	G	622.776	1	50000	17	8	305	9	989	-90.1089,-27.8313	indel
Seq16_pilon	794284	G	GA	622.793	1	50000	26	14	491	12	1176	-106.82,-44.5407	indel
Seq13_pilon	309091	G	GA	630.581	1	50000	16	7	258	9	951	-86.6467,-23.5886	indel
Seq4_pilon	32971	C	G	648.168	1	50000	19	0	0	19	716	-64.8168,0	snp
Seq14_pilon	662783	AT	A	649.091	1	50000	22	11	378	11	1092	-99.2727,-34.3636	indel
Seq8_pilon	306843	CT	C	649.217	1	50000	15	6	237	9	951	-86.6467,-21.725	indel
Seq2_pilon	367733	G	GT	651.613	1	50000	12	4	139	8	855	-78.0188,-12.8575	indel
Seq4_pilon	1020399	TC	T	654.3	1	50000	10	2	72	8	792	-72.27,-6.84	indel
Seq4_pilon	43960	GA	G	655.338	1	50000	14	5	177	9	898	-81.8178,-16.284	indel
Seq2_pilon	465008	GT	G	659.233	1	50000	13	5	189	8	913	-83.3113,-17.388	indel
Seq7_pilon	482499	G	GC	662.2	1	50000	12	3	109	8	838	-86.0909,-79.54,-13.32	indel
Seq12_pilon	856759	GT	G	665.21	1	50000	20	10	360	10	1091	-99.281,-32.76	indel
Seq8_pilon	393015	G	GA	667.766	1	50000	16	6	215	9	950	-105.627,-89.908,-23.1314	indel
Seq15_pilon	746061	CA	C	681.184	1	50000	29	15	530	12	1280	-171.859,-127.544,-59.4259	indel
Seq15_pilon	1075619	TA	T	681.241	1	50000	23	12	438	11	1187	-107.909,-39.785	indel
Seq4_pilon	823128	A	G	682.236	1	50000	22	0	0	20	758	-71.6571,-75.3486,-7.125	snp
Seq14_pilon	501292	GA	G	683.089	1	50000	15	6	208	9	959	-87.3756,-19.0667	indel
Seq8_pilon	206259	A	AT	687.108	1	50000	33	19	696	14	1452	-131.717,-63.0063	indel
Seq2_pilon	676345	CA	C	690.333	1	50000	23	11	395	11	1155	-140.205,-115.631,-46.5975	indel
Seq13_pilon	860983	C	CT	690.533	1	50000	17	7	249	10	1009	-91.819,-22.7657	indel
Seq7_pilon	186976	GA	G	697.918	1	50000	25	13	496	12	1264	-114.813,-45.0215	indel
Seq15_pilon	204777	GT	G	711.273	1	50000	19	9	312	10	1094	-99.554,-28.4267	indel
Seq12_pilon	1043630	TA	T	712.538	1	50000	26	13	456	13	1241	-112.645,-41.3908	indel
Seq2_pilon	382073	T	C	713.686	1	50000	22	0	0	22	789	-71.3686,0	snp
Seq4_pilon	554083	TA	T	716.114	1	50000	29	16	591	13	1379	-125.171,-53.5594	indel
Seq14_pilon	481182	T	A	717.191	1	50000	29	3	77	26	873	-78.9058,-7.18667	snp
Seq14_pilon	732519	AT	A	719.091	1	50000	22	11	370	11	1161	-105.545,-33.6364	indel
Seq13_pilon	790889	G	A	722	1	50000	21	0	0	21	798	-72.2,0	snp
Seq7_pilon	608706	C	CT	732.413	1	50000	25	13	463	12	1269	-115.268,-42.0262	indel
Seq5_pilon	64517	CT	C	744.615	1	50000	31	17	601	14	1421	-128.905,-54.4435	indel
Seq9_pilon	91567	CT	C	749.817	1	50000	11	2	71	9	897	-81.7267,-6.745	indel
Seq4_pilon	595523	TA	T	756.122	1	50000	21	10	266	11	1098	-99.8182,-24.206	indel
Seq5_pilon	484132	CA	C	765.2	1	50000	17	7	238	10	1080	-98.28,-21.76	indel
Seq4_pilon	854201	TA	T	771.141	1	50000	20	9	335	11	1184	-107.636,-30.5222	indel
Seq15_pilon	820678	T	TA	778.222	1	50000	12	3	117	9	974	-88.7422,-10.92	indel
Seq12_pilon	270381	G	GA	784.838	1	50000	20	9	305	11	1169	-106.273,-27.7889	indel
Seq12_pilon	388302	C	CA	787.241	1	50000	27	14	495	13	1362	-123.628,-44.9036	indel
Seq7_pilon	85087	GA	G	788.731	1	50000	25	13	465	12	1333	-121.081,-42.2077	indel
Seq12_pilon	624282	GA	G	798.13	1	50000	15	5	176	10	1055	-96.005,-16.192	indel
Seq15_pilon	228059	A	G	801.91	1	50000	31	2	72	26	963	-97.1207,-97.211,-17.02	snp
Seq7_pilon	40723	GA	G	802.886	1	50000	17	6	219	11	1104	-100.364,-20.075	indel
Seq15_pilon	771028	A	AT	803.19	1	50000	14	4	144	10	1029	-93.639,-13.32	indel
Seq4_pilon	1455603	GT	G	806.527	1	50000	16	6	233	10	1121	-102.011,-21.3583	indel
Seq4_pilon	471096	AT	A	810.605	1	50000	30	16	590	14	1483	-134.529,-53.4688	indel
Seq12_pilon	304626	CT	C	811.136	1	50000	21	9	329	12	1223	-111.089,-29.9756	indel
Seq2_pilon	139644	A	AT	813.656	1	50000	23	10	368	12	1265	-147.712,-116.729,-35.3636	indel
Seq2_pilon	39687	GT	G	816.477	1	50000	17	6	225	11	1125	-102.273,-20.625	indel
Seq15_pilon	660411	G	T	819.175	1	50000	24	0	0	24	906	-81.9175,0	snp
Seq7_pilon	482877	TA	T	822.019	1	50000	21	9	335	12	1241	-112.724,-30.5222	indel
Seq3_pilon	169418	T	TA	829.02	1	50000	15	5	181	10	1094	-99.554,-16.652	indel
Seq4_pilon	795396	G	GT	834.826	1	50000	29	15	534	14	1454	-131.899,-48.416	indel
Seq15_pilon	479634	AT	A	838.589	1	50000	18	6	201	11	1126	-120.211,-108.728,-24.8686	indel
Seq5_pilon	116963	C	CT	840.595	1	50000	23	10	362	13	1289	-117.002,-32.942	indel
Seq2_pilon	468261	TA	T	843.45	1	50000	11	2	53	9	981	-89.38,-5.035	indel
Seq14_pilon	302576	TA	T	845.096	1	50000	18	7	244	11	1175	-106.818,-22.3086	indel
Seq15_pilon	16214	G	GA	848.76	1	50000	18	6	205	11	1141	-121.932,-107.002,-22.1257	indel
Seq10_pilon	110664	G	GA	864.495	1	50000	31	16	536	14	1489	-182.925,-137.451,-51.0012	indel
Seq15_pilon	769021	G	GA	867.284	1	50000	38	20	725	17	1682	-217.281,-162.819,-76.0905	indel
Seq12_pilon	447413	C	CA	869.575	1	50000	15	4	141	11	1100	-100,-13.0425	indel
Seq4_pilon	524645	CT	C	882.885	1	50000	14	3	106	11	1080	-98.1818,-9.89333	indel
Seq4_pilon	921206	TA	T	905.342	1	50000	20	8	282	12	1280	-116.267,-25.7325	indel
Seq9_pilon	270299	AT	A	906.238	1	50000	20	8	285	12	1284	-116.63,-26.0063	indel
Seq2_pilon	305009	CT	C	906.768	1	50000	15	4	146	11	1146	-104.182,-13.505	indel
Seq10_pilon	284567	AT	A	909.943	1	50000	21	8	287	13	1291	-117.183,-26.1888	indel
Seq17_pilon	31270	A	AG	911.573	1	50000	16	1	37	11	1045	-98.2817,-107.349,-16.192	indel
Seq13_pilon	370941	CA	C	945.08	1	50000	38	20	699	17	1742	-220.35,-161.279,-66.7714	indel
Seq17_pilon	16508	T	TG	949.617	1	50000	39	21	750	18	1798	-162.819,-67.8571	indel
Seq10_pilon	480127	A	AT	951.671	1	50000	21	7	243	14	1294	-117.384,-22.2171	indel
Seq15_pilon	507232	C	CA	956.521	1	50000	13	2	72	10	1127	-108.909,-105.545,-9.89333	indel
Seq7_pilon	732086	G	GT	958.058	1	50000	16	5	178	11	1234	-112.182,-16.376	indel
Seq7_pilon	792294	GA	G	960.992	1	50000	18	6	221	12	1281	-116.358,-20.2583	indel
Seq15_pilon	141746	GA	G	961.058	1	50000	26	12	431	14	1491	-135.255,-39.1492	indel
Seq10_pilon	710794	AT	A	963.198	1	50000	19	7	244	12	1306	-118.628,-22.3086	indel
Seq2_pilon	410742	G	GA	964.267	1	50000	15	3	98	11	1162	-114.3,-108.637,-12.21	indel
Seq6_pilon	38611	G	T	964.883	1	50000	29	0	0	29	1068	-96.4883,0	snp
Seq12_pilon	640348	G	GT	965.939	1	50000	15	4	141	11	1206	-109.636,-13.0425	indel
Seq16_pilon	778900	CT	C	973.695	1	50000	22	8	277	14	1352	-122.646,-25.2763	indel
Seq15_pilon	550954	AT	A	982.715	1	50000	14	3	113	11	1197	-108.818,-10.5467	indel
Seq4_pilon	1306685	CT	C	992.775	1	50000	18	6	222	12	1317	-119.628,-20.35	indel
Seq9_pilon	159876	T	TC	1002.15	1	50000	23	6	225	14	1333	-140.999,-127.548,-27.3333	indel
Seq15_pilon	770905	TA	T	1007.97	1	50000	21	8	288	13	1400	-127.077,-26.28	indel
Seq10_pilon	34098	CT	C	1017.7	1	50000	20	7	248	13	1371	-124.445,-22.6743	indel
Seq4_pilon	522414	CT	C	1019.68	1	50000	17	5	188	12	1313	-119.264,-17.296	indel
Seq16_pilon	552045	GT	G	1021.39	1	50000	20	7	240	13	1367	-124.082,-21.9429	indel
Seq2_pilon	580814	A	AT	1033.45	1	50000	17	5	176	12	1316	-119.537,-16.192	indel
Seq15_pilon	613349	CT	C	1044.21	1	50000	25	11	422	14	1574	-142.784,-38.3636	indel
Seq4_pilon	868076	CT	C	1049.38	1	50000	18	6	188	12	1345	-122.171,-17.2333	indel
Seq15_pilon	138156	TA	T	1050.03	1	50000	13	2	66	11	1224	-111.273,-6.27	indel
Seq15_pilon	723017	AG	A	1070.79	1	50000	30	13	478	17	1661	-150.467,-43.3877	indel
Seq13_pilon	323539	CA	C	1070.99	1	50000	19	6	212	13	1394	-126.532,-19.4333	indel
Seq4_pilon	596807	GT	G	1072.9	1	50000	35	17	564	18	1749	-158.382,-51.0918	indel
Seq6_pilon	104745	CA	C	1091.58	1	50000	26	11	392	15	1597	-144.795,-35.6364	indel
Seq11_pilon	254145	A	AT	1094.81	1	50000	27	10	369	16	1579	-176.069,-146.662,-37.1818	indel
Seq13_pilon	93814	CA	C	1096.48	1	50000	24	9	337	15	1548	-140.352,-30.7044	indel
Seq7_pilon	649207	G	C	1098.52	1	50000	35	0	0	33	1221	-110.26,-117.642,-7.79	snp
Seq10_pilon	383072	TA	T	1098.81	1	50000	26	11	402	15	1615	-146.427,-36.5455	indel
Seq12_pilon	851055	C	CT	1108.65	1	50000	19	4	122	13	1347	-133.074,-129.381,-18.5167	indel
Seq15_pilon	124257	CT	C	1114.74	1	50000	17	4	152	13	1383	-125.534,-14.06	indel
Seq2_pilon	265299	TA	T	1119.66	1	50000	26	11	406	15	1642	-148.875,-36.9091	indel
Seq5_pilon	490888	GA	G	1132.01	1	50000	15	3	100	12	1349	-122.534,-9.33333	indel
Seq3_pilon	41617	C	CT	1138.98	1	50000	24	7	264	14	1523	-161.681,-147.568,-33.67	indel
Seq14_pilon	146089	TA	T	1143.14	1	50000	21	7	235	14	1497	-135.799,-21.4857	indel
Seq9_pilon	398246	CT	C	1148.59	1	50000	16	3	92	13	1360	-123.446,-8.58667	indel
Seq14_pilon	95564	CA	C	1173.52	1	50000	24	9	343	15	1639	-148.603,-31.2511	indel
Seq3_pilon	92837	TA	T	1175.15	1	50000	23	8	292	15	1590	-144.16,-26.645	indel
Seq8_pilon	189534	AT	A	1187.27	1	50000	32	14	518	18	1830	-165.717,-46.99	indel
Seq4_pilon	2087	TG	T	1190.71	1	50000	13	1	31	12	1345	-122.171,-3.1	indel
Seq15_pilon	349855	GA	G	1211.25	1	50000	30	12	463	18	1802	-163.181,-42.0558	indel
Seq10_pilon	194756	C	CA	1212.21	1	50000	21	5	189	14	1529	-155.524,-145.906,-24.6857	indel
Seq4_pilon	1015788	A	AT	1222.41	1	50000	29	11	329	17	1680	-181.528,-154.85,-32.6092	indel
Seq3_pilon	223447	C	CT	1228.3	1	50000	34	14	491	18	1849	-211.331,-172.946,-50.1156	indel
Seq10_pilon	165440	AT	A	1231.85	1	50000	17	3	106	14	1467	-133.078,-9.89333	indel
Seq13_pilon	850826	T	TC	1242.56	1	50000	22	5	187	15	1561	-158.194,-147.387,-23.1314	indel
Seq14_pilon	753789	TA	T	1243.56	1	50000	20	6	204	14	1577	-143.056,-18.7	indel
Seq11_pilon	138146	CT	C	1247.32	1	50000	22	7	271	15	1649	-149.509,-24.7771	indel
Seq15_pilon	720957	GA	G	1269.54	1	50000	39	19	664	20	2067	-187.064,-60.1095	indel
Seq4_pilon	2456	GC	G	1282.57	1	50000	13	0	0	13	1413	-128.257,0	indel
Seq4_pilon	2307	TA	T	1287.11	1	50000	13	0	0	13	1418	-128.711,0	indel
Seq15_pilon	14227	G	GA	1307.48	1	50000	20	3	81	15	1526	-147.377,-140.684,-9.936	indel
Seq12_pilon	355924	C	T	1311.04	1	50000	40	0	0	39	1457	-131.504,-135.104,-4	snp
Seq2_pilon	557028	GA	G	1313.32	1	50000	17	2	73	15	1525	-138.267,-6.935	indel
Seq13_pilon	814424	C	CA	1321.47	1	50000	30	11	398	17	1859	-203.936,-174.082,-41.9354	indel
Seq5_pilon	70758	T	TA	1321.77	1	50000	34	13	458	19	1920	-214.763,-179.595,-47.4187	indel
Seq8_pilon	52320	C	T	1330.01	1	50000	42	0	0	41	1478	-133.38,-136.801,-3.8	snp
Seq12_pilon	740399	GT	G	1345.52	1	50000	27	10	372	17	1859	-168.404,-33.852	indel
Seq16_pilon	973453	GA	G	1356.84	1	50000	25	8	300	17	1800	-163.059,-27.375	indel
Seq8_pilon	395793	AT	A	1372.53	1	50000	26	9	324	17	1841	-166.773,-29.52	indel
Seq17_pilon	32243	G	T	1373.61	1	50000	40	0	0	40	1522	-137.361,0	snp
Seq15_pilon	89696	TA	T	1376.02	1	50000	23	7	184	16	1704	-154.425,-16.8229	indel
Seq13_pilon	559037	CA	C	1389.08	1	50000	20	4	156	16	1692	-153.338,-14.43	indel
Seq7_pilon	155133	GA	G	1412.67	1	50000	16	1	38	15	1600	-145.067,-3.8	indel
Seq7_pilon	1074855	CA	C	1427.56	1	50000	25	8	290	17	1868	-169.219,-26.4625	indel
Seq9_pilon	116372	GT	G	1429.08	1	50000	24	7	263	17	1843	-166.954,-24.0457	indel
Seq7_pilon	282655	CA	C	1434.08	1	50000	21	5	169	16	1754	-158.956,-15.548	indel
Seq4_pilon	703315	A	G	1434.68	1	50000	44	0	0	43	1593	-143.74,-146.168,-2.7	snp
Seq12_pilon	540751	CT	C	1437.72	1	50000	30	12	436	18	2025	-183.375,-39.6033	indel
Seq4_pilon	677470	T	TA	1440.87	1	50000	22	4	155	16	1749	-172.312,-165.445,-21.3583	indel
Seq13_pilon	442565	CT	C	1448.82	1	50000	27	9	338	18	1940	-175.678,-30.7956	indel
Seq14_pilon	651186	GT	G	1461.77	1	50000	36	16	568	20	2184	-197.652,-51.475	indel
Seq15_pilon	452069	CT	C	1481.74	1	50000	20	4	144	16	1782	-161.494,-13.32	indel
Seq9_pilon	246346	GT	G	1482.16	1	50000	30	11	410	19	2049	-185.488,-37.2727	indel
Seq7_pilon	97910	TA	T	1485.83	1	50000	37	16	468	21	2111	-190.995,-42.4125	indel
Seq9_pilon	346441	T	TA	1485.85	1	50000	29	10	359	18	2002	-213.333,-184.131,-35.5455	indel
Seq12_pilon	779727	TA	T	1517.85	1	50000	23	6	206	17	1884	-170.668,-18.8833	indel
Seq11_pilon	459246	TA	T	1524.81	1	50000	34	14	476	20	2162	-195.661,-43.18	indel
Seq7_pilon	210057	GT	G	1536.87	1	50000	20	3	114	17	1814	-164.327,-10.64	indel
Seq13_pilon	785533	C	CT	1539.69	1	50000	27	7	262	20	1966	-177.923,-23.9543	indel
Seq12_pilon	478016	TG	AA	1552.15	1	50000	278	168	5365	110	7086	-638.384,-483.169	mnp
Seq2_pilon	798015	AT	A	1565.48	1	50000	29	10	323	19	2054	-185.941,-29.393	indel
Seq16_pilon	743848	GA	G	1587.78	1	50000	28	9	319	19	2075	-187.842,-29.0644	indel
Seq6_pilon	32815	CA	C	1609.61	1	50000	28	9	300	19	2080	-188.295,-27.3333	indel
Seq11_pilon	632933	A	AT	1616.4	1	50000	34	13	449	21	2237	-202.395,-40.7554	indel
Seq12_pilon	477611	ATT	CTA	1619.44	1	50000	343	208	6586	135	8382	-755.001,-593.057	complex
Seq14_pilon	284126	C	CA	1628.23	1	50000	29	8	304	20	2106	-217.761,-193.619,-30.7956	indel
Seq15_pilon	991177	GA	G	1633.04	1	50000	35	13	467	22	2274	-205.694,-42.3892	indel
Seq7_pilon	111209	CT	C	1642.37	1	50000	29	9	330	20	2147	-194.304,-30.0667	indel
Seq7_pilon	392523	TA	T	1673.59	1	50000	21	2	66	19	1918	-173.629,-6.27	indel
Seq7_pilon	707649	CA	C	1689.41	1	50000	25	6	222	19	2091	-189.291,-20.35	indel
Seq13_pilon	625696	GA	G	1695.43	1	50000	35	13	477	22	2353	-212.84,-43.2969	indel
Seq4_pilon	407941	CA	C	1717.64	1	50000	28	7	233	20	2134	-213.907,-199.048,-27.2838	indel
Seq15_pilon	71002	C	CT	1742.07	1	50000	33	11	416	22	2344	-212.025,-37.8182	indel
Seq2_pilon	508490	CT	C	1763.88	1	50000	31	8	283	23	2236	-202.212,-25.8238	indel
Seq5_pilon	359204	CT	C	1769.26	1	50000	25	5	182	20	2140	-193.67,-16.744	indel
Seq1_pilon	237903	CA	C	1788.29	1	50000	28	7	235	21	2214	-200.314,-21.4857	indel
Seq3_pilon	75660	CT	C	1788.95	1	50000	28	7	260	21	2240	-202.667,-23.7714	indel
Seq13_pilon	557461	GT	G	1910.29	1	50000	38	13	452	25	2567	-232.057,-41.0277	indel
Seq17_pilon	71014	C	CG	1911.06	1	50000	35	9	328	26	2445	-220.99,-29.8844	indel
Seq4_pilon	625873	C	CT	1973.56	1	50000	24	3	117	21	2302	-208.276,-10.92	indel
Seq2_pilon	718555	T	TA	1975.61	1	50000	35	9	344	23	2532	-259.739,-238.254,-40.6933	indel
Seq15_pilon	1075548	T	TA	2033.58	1	50000	32	7	240	23	2492	-246.791,-231.876,-28.5178	indel
Seq12_pilon	54338	A	AT	2069.37	1	50000	36	10	365	26	2657	-240.152,-33.215	indel
Seq16_pilon	869405	CA	C	2165.41	1	50000	31	7	275	24	2673	-241.684,-25.1429	indel
Seq11_pilon	523471	CT	C	2175.01	1	50000	35	9	324	26	2733	-247.021,-29.52	indel
Seq15_pilon	92744	TA	T	2284.6	1	50000	36	10	347	26	2877	-260.037,-31.577	indel
Seq10_pilon	684222	CT	C	2306.27	1	50000	37	9	313	28	2868	-259.144,-28.5178	indel
Seq4_pilon	1663	AG	A	2491.93	1	50000	29	2	69	27	2830	-255.748,-6.555	indel
Seq8_pilon	110610	AT	A	2550.32	1	50000	43	12	430	31	3256	-294.09,-39.0583	indel
Seq5_pilon	350655	AT	A	2561.97	1	50000	50	17	609	33	3448	-311.365,-55.1682	indel
Seq17_pilon	83443	A	T	2718.62	1	50000	84	0	0	80	3021	-275.868,-286.939,-15.0775	snp
Seq15_pilon	722906	TG	T	3238.1	1	50000	59	19	678	40	4268	-385.187,-61.3768	indel
Seq12_pilon	478017	G	A	3268.09	1	50000	138	15	472	123	4103	-369.604,-42.7947	snp
Seq17_pilon	33762	AT	A	3311.02	1	50000	58	18	672	40	4343	-391.956,-60.8533	indel
Seq17_pilon	8298	A	AT	4936.02	1	50000	71	13	489	55	5966	-581.899,-548.158,-54.5563	indel
Seq12_pilon	477748	C	T	6125.31	1	50000	226	10	345	215	7151	-674.973,-646.713,-34.1818	snp
Seq12_pilon	478814	GG	CC	6985.57	1	50000	288	21	762	121	8522	-836.214,-1233.24,-534.686	mnp
Seq12_pilon	477613	T	A	7572.27	1	50000	400	64	2241	336	10655	-959.267,-202.04	snp
Seq7_pilon	624399	C	CT	21604.2	1	50000	257	15	476	242	24473	-2203.58,-43.1573	indel
Seq12_pilon	477743	T	C	32748	1	50000	1220	12	424	1094	36811	-3522.67,-3698.44,-423.643	snp
Seq12_pilon	478150	C	T	49314.7	1	50000	4423	17	554	4077	148351	-14535.8,-14490.1,-1188.38	snp

## Sheet: R542L
#CHROM	POS	REF	ALT	QUAL	GT	GQ	DP	RA	QR	AA	QA	GL	TYPE
Seq14_pilon	322582	A	AT	173.492	1	50000	60	41	1490	19	1677	-151.813,-134.463	indel
Seq4_pilon	1088251	GA	G	186.67	1	50000	37	26	925	11	1125	-102.273,-83.6058	indel
Seq12_pilon	669858	G	GA	200.944	1	50000	26	17	631	8	847	-133.611,-87.6489,-67.5544	indel
Seq4_pilon	506326	TA	T	215.372	1	50000	39	27	1002	12	1234	-112.088,-90.5511	indel
Seq11_pilon	631237	GA	G	239.992	1	50000	33	22	741	10	1001	-157.324,-93.1818,-69.1826	indel
Seq2_pilon	496673	C	CA	241.727	1	50000	33	22	780	11	1042	-94.7273,-70.5545	indel
Seq2_pilon	522813	CA	C	254.55	1	50000	28	19	683	9	958	-87.2844,-61.8295	indel
Seq14_pilon	481189	T	A	265.879	1	50000	58	30	656	27	950	-144.822,-86.3814,-59.7935	snp
Seq7_pilon	848101	GA	G	270.137	1	50000	37	25	922	12	1215	-110.363,-83.3488	indel
Seq3_pilon	170	C	T	276.133	1	50000	25	7	255	16	562	-77.5775,-58.3178,-30.7044	snp
Seq14_pilon	236564	CT	C	277.034	1	50000	18	11	353	7	654	-59.7943,-32.0909	indel
Seq12_pilon	629366	GA	G	279.86	1	50000	36	21	700	10	1006	-161.882,-105.536,-77.55	indel
Seq5_pilon	197574	T	TA	280.667	1	50000	36	23	747	11	1053	-165.584,-99.3923,-71.3256	indel
Seq4_pilon	1019679	G	GA	301.377	1	50000	32	21	738	11	1066	-96.9091,-66.7714	indel
Seq5_pilon	424519	CA	C	327.187	1	50000	21	13	486	8	842	-76.8325,-44.1138	indel
Seq8_pilon	245765	CT	C	343.583	1	50000	34	22	781	12	1156	-105.003,-70.645	indel
Seq16_pilon	763031	GA	G	351.754	1	50000	41	27	931	13	1315	-202.702,-121.466,-86.2911	indel
Seq15_pilon	668159	T	TA	368.344	1	50000	27	17	613	10	1015	-92.365,-55.5306	indel
Seq1_pilon	71789	GA	G	380.818	1	50000	46	31	1023	14	1439	-222.127,-131.013,-92.9316	indel
Seq4_pilon	959677	GA	G	385.312	1	50000	45	27	946	15	1369	-208.901,-130.491,-91.9593	indel
Seq5_pilon	70757	AT	A	387.98	1	50000	64	45	1662	19	2085	-188.747,-149.949	indel
Seq15_pilon	747314	CA	C	397.442	1	50000	23	14	509	9	943	-85.9178,-46.1736	indel
Seq14_pilon	196705	C	CT	399.685	1	50000	35	22	790	12	1227	-182.123,-121.722,-81.753	indel
Seq15_pilon	537684	AT	A	401.267	1	50000	40	27	927	13	1365	-123.9,-83.7733	indel
Seq14_pilon	198790	A	AT	415.058	1	50000	41	27	935	14	1389	-126.002,-84.4963	indel
Seq4_pilon	541659	A	G	416.925	1	50000	12	0	0	12	459	-41.6925,0	snp
Seq7_pilon	1011597	CA	C	428.637	1	50000	27	15	556	10	1026	-153.383,-106.457,-63.5929	indel
Seq8_pilon	95192	AT	A	470.327	1	50000	33	21	710	12	1225	-111.271,-64.2381	indel
Seq4_pilon	1245382	GA	G	491.985	1	50000	32	20	718	12	1257	-114.178,-64.979	indel
Seq8_pilon	290598	CT	C	510.123	1	50000	29	17	594	12	1154	-104.822,-53.8094	indel
Seq15_pilon	664656	TC	T	510.951	1	50000	35	22	840	13	1400	-127.077,-75.9818	indel
Seq8_pilon	115681	GT	G	518.278	1	50000	36	23	810	13	1378	-125.08,-73.2522	indel
Seq5_pilon	547295	CA	C	518.849	1	50000	23	13	459	10	1028	-93.548,-41.6631	indel
Seq15_pilon	769021	G	GA	601.136	1	50000	50	32	1055	18	1716	-155.393,-95.2797	indel
Seq3_pilon	54576	CA	C	611.546	1	50000	51	33	1193	18	1865	-168.886,-107.732	indel
Seq15_pilon	480922	C	T	612.885	1	50000	21	1	38	19	719	-68.5085,-68.5085,-7.22	snp
Seq13_pilon	406580	TA	T	635.024	1	50000	35	21	772	14	1470	-133.35,-69.8476	indel
Seq16_pilon	138553	AT	A	638.248	1	50000	33	19	663	13	1365	-183.154,-124.369,-60.5445	indel
Seq16_pilon	866519	TA	T	641.312	1	50000	31	18	650	13	1355	-122.992,-58.8611	indel
Seq2_pilon	718389	T	TA	647.889	1	50000	49	28	1021	17	1735	-248.652,-169.01,-104.221	indel
Seq3_pilon	56723	CA	C	651.603	1	50000	27	14	295	10	1012	-128.346,-104.566,-39.4059	indel
Seq7_pilon	608706	C	CT	656.621	1	50000	31	17	600	14	1323	-120.015,-54.3529	indel
Seq16_pilon	778900	CT	C	659.869	1	50000	44	27	1009	17	1735	-157.171,-91.1837	indel
Seq11_pilon	597972	G	GA	665.711	1	50000	44	26	909	16	1642	-230.197,-154.85,-88.2789	indel
Seq7_pilon	1011419	C	CT	677.844	1	50000	16	1	37	9	786	-74.893,-82.7787,-14.9943	indel
Seq9_pilon	141279	GA	G	679.858	1	50000	37	22	788	15	1536	-139.264,-71.2782	indel
Seq14_pilon	481182	T	A	680.241	1	50000	48	16	229	32	983	-88.7772,-20.7531	snp
Seq11_pilon	17000	AG	A	694.466	1	50000	52	33	1274	19	2038	-184.493,-115.046	indel
Seq10_pilon	316807	GA	G	694.961	1	50000	32	18	628	14	1393	-126.365,-56.8689	indel
Seq12_pilon	851055	C	CT	697.593	1	50000	25	11	363	11	1132	-135.23,-112.758,-42.9986	indel
Seq15_pilon	145451	CT	C	699.525	1	50000	27	14	547	12	1317	-168.477,-123.174,-53.2213	indel
Seq12_pilon	595124	GA	G	720.959	1	50000	34	20	744	14	1537	-139.428,-67.332	indel
Seq12_pilon	479780	C	CT	739.225	1	50000	49	30	1110	18	1924	-273.692,-177.703,-103.781	indel
Seq6_pilon	104745	CA	C	747.814	1	50000	29	16	543	13	1366	-123.991,-49.2094	indel
Seq5_pilon	259181	GA	G	770.267	1	50000	24	12	417	12	1265	-114.904,-37.8775	indel
Seq4_pilon	773220	CT	C	776.073	1	50000	17	7	249	10	1103	-100.373,-22.7657	indel
Seq1_pilon	72203	TA	T	785.331	1	50000	27	13	463	14	1329	-120.559,-42.0262	indel
Seq6_pilon	38611	G	T	791.426	1	50000	27	0	0	23	880	-84.9013,-95.7926,-16.65	snp
Seq5_pilon	36652	GT	G	794.211	1	50000	47	27	906	19	1782	-242.504,-169.959,-90.5379	indel
Seq2_pilon	469836	CT	C	813.433	1	50000	31	17	502	14	1398	-126.819,-45.4753	indel
Seq12_pilon	802623	CT	C	818.807	1	50000	53	33	1096	19	1998	-279.055,-191.408,-109.527	indel
Seq6_pilon	111801	CA	C	827.27	1	50000	47	28	987	19	1899	-171.909,-89.1825	indel
Seq2_pilon	139644	A	AT	845.25	1	50000	45	26	845	17	1777	-236.59,-167.021,-82.4961	indel
Seq4_pilon	1416568	GA	G	860.188	1	50000	29	14	501	15	1450	-131.467,-45.4479	indel
Seq13_pilon	209396	CT	C	867.063	1	50000	35	19	697	16	1653	-149.803,-63.0968	indel
Seq7_pilon	836415	GA	G	872.459	1	50000	42	24	812	17	1774	-233.371,-163.634,-76.388	indel
Seq3_pilon	128221	AT	A	897.699	1	50000	42	24	863	18	1853	-167.799,-78.0296	indel
Seq11_pilon	230764	TA	T	904.2	1	50000	35	19	678	16	1675	-151.797,-61.3768	indel
Seq7_pilon	646782	GT	G	911.761	1	50000	36	19	716	17	1722	-155.993,-64.8168	indel
Seq10_pilon	740536	A	G	919.945	1	50000	43	7	255	33	1277	-138.263,-125.938,-33.943	snp
Seq10_pilon	124527	GA	G	931.893	1	50000	37	20	732	17	1760	-159.435,-66.246	indel
Seq13_pilon	785533	C	CT	932.839	1	50000	36	19	672	16	1701	-214.248,-163.693,-70.409	indel
Seq13_pilon	652846	CT	C	940.286	1	50000	42	24	882	18	1919	-173.776,-79.7475	indel
Seq2_pilon	833682	GA	G	948.031	1	50000	40	22	812	18	1858	-168.252,-73.4491	indel
Seq3_pilon	258965	G	A	948.567	1	50000	32	2	76	30	1130	-102.077,-7.22	snp
Seq5_pilon	33839	C	CT	961.067	1	50000	34	18	636	16	1696	-153.7,-57.5933	indel
Seq5_pilon	384096	C	CA	971.269	1	50000	19	2	73	12	1148	-121.707,-124.921,-27.7943	indel
Seq6_pilon	181289	CT	C	973.197	1	50000	30	11	361	15	1437	-180.624,-153.261,-55.9413	indel
Seq16_pilon	368230	CA	C	977.668	1	50000	23	10	357	13	1435	-130.254,-32.487	indel
Seq8_pilon	306843	CT	C	980.717	1	50000	36	18	675	18	1758	-159.197,-61.125	indel
Seq15_pilon	303450	GT	G	981.868	1	50000	29	12	414	17	1499	-135.792,-37.605	indel
Seq15_pilon	681853	CA	C	983.995	1	50000	26	11	366	14	1452	-164.347,-133.552,-35.1525	indel
Seq4_pilon	823128	A	G	994.276	1	50000	31	0	0	29	1105	-103.432,-107.123,-7.695	snp
Seq14_pilon	519030	T	G	1000.54	1	50000	30	0	0	29	1112	-100.463,-104.154,-4.1	snp
Seq7_pilon	606238	T	TA	1005.03	1	50000	32	16	591	16	1700	-154.063,-53.5594	indel
Seq16_pilon	94154	AT	A	1009.37	1	50000	39	21	734	18	1848	-167.347,-66.4095	indel
Seq17_pilon	87841	TA	AT	1009.6	1	50000	209	126	4830	82	5948	-970.538,-545.049,-444.088	mnp
Seq15_pilon	349855	GA	G	1021.53	1	50000	40	21	782	19	1910	-172.905,-70.7524	indel
Seq7_pilon	606442	GA	G	1023.38	1	50000	33	17	596	16	1725	-156.328,-53.9906	indel
Seq4_pilon	165073	CT	C	1024.06	1	50000	32	16	538	16	1668	-151.163,-48.7563	indel
Seq5_pilon	408703	GA	G	1024.06	1	50000	40	22	772	18	1902	-172.237,-69.8309	indel
Seq15_pilon	746061	CA	C	1041.45	1	50000	40	21	786	19	1936	-175.259,-71.1143	indel
Seq10_pilon	174421	GA	G	1047.03	1	50000	38	21	654	17	1809	-163.874,-59.1714	indel
Seq2_pilon	253392	CT	C	1057.69	1	50000	32	15	486	17	1654	-149.833,-44.064	indel
Seq3_pilon	223447	C	CT	1073.28	1	50000	29	13	434	16	1619	-146.722,-39.3938	indel
Seq8_pilon	297334	CG	C	1079.32	1	50000	24	9	322	15	1514	-137.269,-29.3378	indel
Seq8_pilon	13166	TA	T	1101.85	1	50000	27	11	373	16	1590	-144.094,-33.9091	indel
Seq15_pilon	232081	GA	G	1104.98	1	50000	37	19	688	18	1908	-172.78,-62.2821	indel
Seq5_pilon	116963	C	CT	1139.05	1	50000	49	26	953	23	2212	-200.042,-86.1365	indel
Seq15_pilon	1008389	AT	A	1141.22	1	50000	29	13	455	16	1715	-155.422,-41.3	indel
Seq8_pilon	59610	CT	C	1146.66	1	50000	33	16	515	17	1781	-161.338,-46.6719	indel
Seq14_pilon	86536	C	CT	1146.94	1	50000	39	21	636	18	1902	-172.237,-57.5429	indel
Seq10_pilon	284567	AT	A	1165.5	1	50000	28	11	399	17	1687	-152.822,-36.2727	indel
Seq16_pilon	973453	GA	G	1167.79	1	50000	38	19	678	19	1968	-178.156,-61.3768	indel
Seq4_pilon	2087	TG	T	1169.9	1	50000	13	1	40	12	1332	-120.99,-4	indel
Seq5_pilon	273869	G	GT	1171.75	1	50000	53	26	969	22	2265	-291.734,-221.588,-104.413	indel
Seq12_pilon	268540	G	GA	1184.82	1	50000	41	21	731	20	2040	-184.62,-66.1381	indel
Seq8_pilon	169108	GA	G	1191.78	1	50000	47	25	905	22	2222	-200.99,-81.812	indel
Seq14_pilon	284126	C	CA	1196.23	1	50000	29	10	384	17	1707	-188.964,-161.952,-42.3283	indel
Seq13_pilon	739337	T	C	1200.43	1	50000	39	0	0	36	1335	-127.542,-133.67,-13.6267	snp
Seq7_pilon	649207	G	C	1203.02	1	50000	38	0	0	37	1337	-120.691,-124.202,-3.9	snp
Seq12_pilon	1008962	GT	G	1203.18	1	50000	33	14	514	18	1844	-212.957,-173.267,-52.9493	indel
Seq16_pilon	778370	GA	G	1211.05	1	50000	37	18	655	19	1993	-180.419,-59.3139	indel
Seq12_pilon	258861	CT	C	1214.14	1	50000	38	18	668	20	2010	-181.905,-60.4911	indel
Seq10_pilon	100269	A	AT	1229.76	1	50000	63	37	1147	25	2506	-329.359,-229.306,-106.33	indel
Seq4_pilon	854201	TA	T	1231.85	1	50000	36	17	613	18	1974	-233.569,-187.752,-64.5661	indel
Seq12_pilon	355924	C	T	1236.75	1	50000	42	0	0	37	1374	-132.938,-139.959,-16.284	snp
Seq10_pilon	145768	GA	G	1237.26	1	50000	21	6	215	15	1582	-143.435,-19.7083	indel
Seq11_pilon	662452	CA	C	1239.64	1	50000	29	11	342	17	1712	-185.594,-155.665,-31.7008	indel
Seq15_pilon	550954	AT	A	1253.9	1	50000	30	12	433	18	1819	-164.721,-39.3308	indel
Seq4_pilon	524645	CT	C	1256.38	1	50000	35	15	508	19	1897	-217.157,-173.579,-47.9406	indel
Seq7_pilon	210057	GT	G	1257.86	1	50000	28	11	411	17	1801	-163.149,-37.3636	indel
Seq16_pilon	757500	GA	G	1259.15	1	50000	33	14	519	19	1911	-172.996,-47.0807	indel
Seq3_pilon	214772	C	A	1260.79	1	50000	40	0	0	40	1397	-126.079,0	snp
Seq8_pilon	270130	CT	C	1313.41	1	50000	48	25	865	23	2317	-209.537,-78.196	indel
Seq8_pilon	521261	C	A	1321.03	1	50000	45	1	32	42	1500	-141.837,-142.649,-10.5467	snp
Seq2_pilon	367733	G	GT	1338.24	1	50000	28	9	324	17	1804	-192.338,-170.552,-36.7273	indel
Seq2_pilon	302216	A	AT	1343.87	1	50000	37	16	533	20	2019	-230.389,-183.395,-49.0082	indel
Seq15_pilon	16214	G	GA	1352.19	1	50000	27	9	329	17	1824	-194.598,-168.252,-33.033	indel
Seq4_pilon	541679	T	C	1352.76	1	50000	41	0	0	41	1499	-135.276,0	snp
Seq10_pilon	110664	G	GA	1379.46	1	50000	32	13	441	19	1966	-177.975,-40.0292	indel
Seq11_pilon	470625	AT	A	1394.8	1	50000	36	16	567	20	2109	-190.865,-51.3844	indel
Seq4_pilon	365117	TA	T	1398.59	1	50000	41	20	728	21	2274	-205.743,-65.884	indel
Seq13_pilon	380634	GA	G	1401.77	1	50000	50	26	959	24	2509	-226.855,-86.6788	indel
Seq8_pilon	369939	AT	A	1404.18	1	50000	34	15	564	19	2116	-191.554,-51.136	indel
Seq9_pilon	58721	G	GT	1406.11	1	50000	45	22	769	23	2324	-210.17,-69.5595	indel
Seq9_pilon	40583	CT	C	1416.76	1	50000	43	20	741	22	2308	-275.136,-218.129,-76.4524	indel
Seq8_pilon	284465	C	CA	1431.28	1	50000	43	20	689	22	2272	-267.195,-209.085,-65.9571	indel
Seq2_pilon	676345	CA	C	1431.72	1	50000	39	18	650	21	2233	-202.033,-58.8611	indel
Seq13_pilon	56997	G	GA	1434.44	1	50000	29	7	274	17	1862	-205.924,-190.95,-47.5058	indel
Seq15_pilon	228059	A	G	1451.11	1	50000	47	0	0	44	1612	-145.446,-154.444,-9.33333	snp
Seq15_pilon	770905	TA	T	1451.61	1	50000	39	18	670	21	2275	-205.833,-60.6722	indel
Seq4_pilon	596807	GT	G	1462.85	1	50000	58	31	1107	26	2725	-345.552,-248.519,-102.234	indel
Seq5_pilon	396774	CA	C	1469	1	50000	40	19	656	21	2280	-206.286,-59.3853	indel
Seq15_pilon	720957	GA	G	1476.85	1	50000	30	11	378	19	2011	-182.048,-34.3636	indel
Seq16_pilon	819422	GA	G	1479.98	1	50000	32	12	452	20	2089	-189.055,-41.0567	indel
Seq14_pilon	591310	AT	A	1481.29	1	50000	33	13	407	20	2045	-185.073,-36.9431	indel
Seq10_pilon	145848	CT	C	1483.49	1	50000	32	13	469	19	2109	-190.92,-42.5708	indel
Seq15_pilon	94095	TA	T	1485.12	1	50000	39	18	628	21	2270	-205.381,-56.8689	indel
Seq11_pilon	120893	AT	A	1491.07	1	50000	37	16	595	21	2244	-203.029,-53.9219	indel
Seq14_pilon	694411	GA	G	1491.73	1	50000	42	19	677	22	2327	-271.093,-210.984,-61.8115	indel
Seq10_pilon	38577	GT	G	1503.71	1	50000	33	13	483	20	2146	-194.213,-43.8415	indel
Seq4_pilon	32971	C	G	1513.45	1	50000	47	0	0	45	1682	-155.445,-159.135,-7.79	snp
Seq13_pilon	790889	G	A	1517.15	1	50000	46	0	0	45	1686	-152.115,-155.715,-4	snp
Seq15_pilon	660411	G	T	1536.13	1	50000	51	0	0	46	1707	-164.171,-171.553,-17.94	snp
Seq9_pilon	116372	GT	G	1540.5	1	50000	42	19	660	22	2364	-272.898,-224.007,-69.9565	indel
Seq4_pilon	522414	CT	C	1545.09	1	50000	35	14	483	21	2192	-198.324,-43.815	indel
Seq12_pilon	218922	G	GA	1558.03	1	50000	37	14	481	21	2205	-242.507,-206.643,-50.8406	indel
Seq15_pilon	877054	GA	G	1573.24	1	50000	36	15	551	21	2291	-207.281,-49.9573	indel
Seq13_pilon	542288	A	G	1596.41	1	50000	55	0	0	49	1774	-163.623,-180.724,-21.0833	snp
Seq4_pilon	752802	TA	T	1600.23	1	50000	55	27	1001	27	2772	-340.269,-259.686,-99.6639	indel
Seq9_pilon	277934	AT	A	1600.28	1	50000	45	20	704	25	2475	-223.74,-63.712	indel
Seq12_pilon	388302	C	CA	1612.83	1	50000	34	13	432	21	2216	-200.495,-39.2123	indel
Seq4_pilon	1015788	A	AT	1619.72	1	50000	48	21	709	26	2502	-289.673,-228.818,-66.8459	indel
Seq12_pilon	624282	GA	G	1623.44	1	50000	49	24	853	25	2649	-239.47,-77.1254	indel
Seq2_pilon	382073	T	C	1630.63	1	50000	51	0	0	50	1812	-163.442,-166.863,-3.8	snp
Seq7_pilon	606851	GA	G	1631	1	50000	34	12	450	22	2255	-203.975,-40.875	indel
Seq13_pilon	687675	GT	G	1645.24	1	50000	29	9	305	20	2125	-192.313,-27.7889	indel
Seq11_pilon	348827	GA	G	1646.19	1	50000	30	10	364	20	2185	-197.743,-33.124	indel
Seq11_pilon	294564	TA	T	1648.34	1	50000	50	24	867	26	2691	-243.225,-78.3913	indel
Seq4_pilon	2127	TG	T	1661.31	1	50000	33	12	459	21	2297	-207.824,-41.6925	indel
Seq2_pilon	265412	CT	C	1668.63	1	50000	37	15	547	22	2393	-216.458,-49.5947	indel
Seq12_pilon	270381	G	GA	1668.71	1	50000	37	13	441	22	2288	-246.39,-213.655,-46.784	indel
Seq4_pilon	273901	TC	T	1674.11	1	50000	22	4	153	18	2005	-181.564,-14.1525	indel
Seq7_pilon	186976	GA	G	1677.29	1	50000	46	21	706	25	2562	-231.605,-63.8762	indel
Seq4_pilon	595523	TA	T	1679.68	1	50000	27	8	193	19	2050	-185.579,-17.6113	indel
Seq8_pilon	117498	GA	G	1682.79	1	50000	43	19	698	24	2560	-231.467,-63.1874	indel
Seq7_pilon	101852	G	T	1691.95	1	50000	55	0	0	50	1880	-179.475,-186.767,-17.572	snp
Seq12_pilon	477611	ATT	CTA	1705.92	1	50000	445	275	8850	169	10742	-1763.72,-969.753,-799.162	complex
Seq13_pilon	391088	GT	G	1716.71	1	50000	36	13	464	23	2364	-213.788,-42.1169	indel
Seq10_pilon	114223	A	AT	1727.36	1	50000	50	23	809	27	2721	-245.898,-73.1617	indel
Seq12_pilon	335598	GA	G	1735.7	1	50000	40	16	580	24	2501	-226.132,-52.5625	indel
Seq4_pilon	1270720	CT	C	1766.1	1	50000	53	25	882	28	2837	-256.343,-79.7328	indel
Seq11_pilon	9215	T	TA	1785.65	1	50000	53	24	813	28	2790	-324.963,-255.134,-76.5688	indel
Seq5_pilon	490888	GA	G	1802.89	1	50000	54	27	935	27	2930	-264.785,-84.4963	indel
Seq8_pilon	206259	A	AT	1814.98	1	50000	46	20	734	26	2743	-247.925,-66.427	indel
Seq15_pilon	490539	CT	C	1818.73	1	50000	43	18	655	25	2668	-241.187,-59.3139	indel
Seq5_pilon	275466	GA	G	1823.54	1	50000	53	26	940	27	2958	-267.316,-84.9615	indel
Seq15_pilon	826281	G	A	1831.79	1	50000	57	0	0	55	2035	-186.309,-189.639,-6.46	snp
Seq11_pilon	523471	CT	C	1834.44	1	50000	43	17	626	26	2657	-240.152,-56.7082	indel
Seq1_pilon	37056	AT	A	1850.12	1	50000	45	19	672	26	2720	-245.846,-60.8337	indel
Seq9_pilon	353585	CT	C	1851.18	1	50000	46	20	690	26	2739	-247.563,-62.445	indel
Seq3_pilon	41617	C	CT	1857.53	1	50000	30	8	278	22	2334	-211.121,-25.3675	indel
Seq7_pilon	85087	GA	G	1885.91	1	50000	32	10	344	22	2431	-219.895,-31.304	indel
Seq5_pilon	52798	CA	C	1888.3	1	50000	36	11	386	25	2477	-223.921,-35.0909	indel
Seq1_pilon	5312	AT	A	1897.54	1	50000	45	18	689	26	2790	-313.901,-255.839,-66.0842	indel
Seq16_pilon	45047	T	TA	1898.99	1	50000	48	19	653	27	2756	-307.551,-256.218,-66.319	indel
Seq9_pilon	239804	CT	C	1905.36	1	50000	32	9	283	23	2392	-216.32,-25.7844	indel
Seq12_pilon	640348	G	GT	1923.03	1	50000	51	23	867	28	2996	-270.71,-78.407	indel
Seq13_pilon	757907	T	TA	1925.96	1	50000	47	20	668	26	2800	-312.874,-255.839,-63.2429	indel
Seq9_pilon	246346	GT	G	1926.36	1	50000	41	15	548	26	2681	-242.321,-49.6853	indel
Seq4_pilon	625873	C	CT	1931.09	1	50000	34	10	368	23	2506	-259.531,-230.291,-37.1818	indel
Seq11_pilon	254145	A	AT	1933.16	1	50000	54	23	793	29	2934	-336.147,-268.8,-75.484	indel
Seq13_pilon	309091	G	GA	1939.34	1	50000	47	20	706	27	2853	-257.827,-63.893	indel
Seq13_pilon	514430	AT	A	1940.01	1	50000	45	18	617	27	2765	-249.874,-55.8728	indel
Seq5_pilon	320949	TA	T	1940.45	1	50000	41	16	595	25	2743	-247.967,-53.9219	indel
Seq14_pilon	188194	GA	G	1941.12	1	50000	47	20	728	27	2877	-259.996,-65.884	indel
Seq2_pilon	163336	G	GA	1970.05	1	50000	54	25	900	28	3081	-359.041,-281.786,-84.7808	indel
Seq11_pilon	135457	AT	A	1970.52	1	50000	50	21	700	28	2882	-323.111,-263.717,-66.665	indel
Seq14_pilon	302576	TA	T	1979.97	1	50000	27	5	181	22	2373	-214.649,-16.652	indel
Seq2_pilon	718555	T	TA	1985.66	1	50000	47	18	658	26	2857	-317.149,-269.228,-70.6619	indel
Seq12_pilon	717737	AT	A	1986.72	1	50000	23	2	63	21	2262	-204.657,-5.985	indel
Seq7_pilon	282655	CA	C	1997.76	1	50000	41	15	549	26	2761	-249.552,-49.776	indel
Seq2_pilon	580814	A	AT	2003.9	1	50000	50	21	735	28	2954	-332.763,-270.492,-70.1023	indel
Seq14_pilon	501292	GA	G	2025.78	1	50000	49	21	786	28	3029	-273.692,-71.1143	indel
Seq7_pilon	707649	CA	C	2030.45	1	50000	42	16	580	26	2828	-255.608,-52.5625	indel
Seq11_pilon	138146	CT	C	2050.66	1	50000	38	12	441	26	2712	-245.123,-40.0575	indel
Seq11_pilon	498813	TA	T	2053.67	1	50000	44	17	619	27	2893	-261.441,-56.0741	indel
Seq15_pilon	820678	T	TA	2059.24	1	50000	39	11	399	25	2680	-277.965,-251.916,-45.9921	indel
Seq15_pilon	507232	C	CA	2070.02	1	50000	39	13	454	25	2746	-288.842,-250.998,-43.9964	indel
Seq13_pilon	776796	A	AT	2085.62	1	50000	54	23	769	30	3079	-347.046,-288.039,-79.4763	indel
Seq4_pilon	216610	TA	T	2086.72	1	50000	53	23	873	30	3184	-287.621,-78.9496	indel
Seq12_pilon	857634	AT	A	2113.88	1	50000	53	23	810	30	3151	-284.64,-73.2522	indel
Seq5_pilon	350655	AT	A	2138.97	1	50000	38	11	403	26	2772	-286.608,-251.23,-37.3325	indel
Seq15_pilon	204777	GT	G	2155.05	1	50000	40	14	463	26	2849	-257.506,-42.0007	indel
Seq15_pilon	300779	CT	C	2158.1	1	50000	41	14	510	27	2900	-262.074,-46.2643	indel
Seq12_pilon	54338	A	AT	2171.99	1	50000	48	18	643	30	3049	-275.426,-58.2272	indel
Seq15_pilon	771028	A	AT	2176.07	1	50000	40	13	465	27	2875	-259.815,-42.2077	indel
Seq7_pilon	792294	GA	G	2186.3	1	50000	39	13	498	26	2919	-263.833,-45.2031	indel
Seq13_pilon	85391	A	AT	2190.27	1	50000	53	22	807	30	3233	-364.377,-295.716,-76.6887	indel
Seq2_pilon	410742	G	GA	2202.06	1	50000	49	19	670	29	3109	-340.897,-283.647,-63.4405	indel
Seq4_pilon	677470	T	TA	2203.79	1	50000	41	13	473	27	2914	-305.677,-266.734,-46.355	indel
Seq12_pilon	779727	TA	T	2214.12	1	50000	53	23	838	30	3290	-297.197,-75.7843	indel
Seq7_pilon	696565	G	GT	2218.65	1	50000	45	17	616	28	3073	-277.668,-55.8024	indel
Seq8_pilon	12084	CT	C	2223.74	1	50000	46	17	597	29	3060	-276.455,-54.0812	indel
Seq13_pilon	860983	C	CT	2230.24	1	50000	42	14	444	28	2914	-263.301,-40.2771	indel
Seq11_pilon	632933	A	AT	2233.59	1	50000	38	11	403	27	2877	-259.996,-36.6364	indel
Seq13_pilon	814424	C	CA	2263.31	1	50000	39	11	368	27	2875	-292.723,-263.481,-37.1508	indel
Seq15_pilon	1059439	TA	T	2272.28	1	50000	48	18	634	30	3151	-284.64,-57.4122	indel
Seq16_pilon	53717	CT	C	2306.65	1	50000	41	13	479	28	3034	-274.144,-43.4785	indel
Seq10_pilon	165440	AT	A	2342.37	1	50000	39	12	396	27	2990	-270.207,-35.97	indel
Seq7_pilon	882650	TA	T	2353.63	1	50000	61	28	1046	33	3653	-329.877,-94.5136	indel
Seq15_pilon	991177	GA	G	2366.34	1	50000	48	16	574	31	3196	-340.102,-291.077,-54.4435	indel
Seq8_pilon	536951	AT	A	2368.99	1	50000	40	12	417	28	3041	-274.776,-37.8775	indel
Seq15_pilon	722906	TG	T	2369.56	1	50000	42	13	469	29	3094	-279.527,-42.5708	indel
Seq12_pilon	915002	A	AT	2373.56	1	50000	56	22	804	33	3434	-382.191,-312.869,-75.513	indel
Seq15_pilon	124257	CT	C	2390.46	1	50000	43	14	506	29	3154	-284.948,-45.9014	indel
Seq2_pilon	264206	AT	A	2391.24	1	50000	50	19	688	31	3337	-301.406,-62.2821	indel
Seq13_pilon	850826	T	TC	2408.71	1	50000	33	4	135	27	2804	-265.458,-258.838,-17.9667	indel
Seq9_pilon	346441	T	TA	2432.58	1	50000	40	11	423	28	3118	-319.598,-284.496,-41.2383	indel
Seq15_pilon	1049883	CT	C	2435.7	1	50000	42	13	426	29	3124	-282.237,-38.6677	indel
Seq2_pilon	646117	TA	T	2443.5	1	50000	33	6	218	27	2925	-264.333,-19.9833	indel
Seq12_pilon	430981	GA	G	2445.08	1	50000	49	17	539	32	3248	-293.335,-48.8271	indel
Seq7_pilon	855989	CA	C	2474.25	1	50000	25	0	0	25	2737	-247.425,0	indel
Seq11_pilon	519683	A	AT	2492.51	1	50000	53	19	648	33	3410	-366,-311.515,-62.264	indel
Seq15_pilon	433961	CA	C	2578.69	1	50000	41	11	371	30	3228	-291.596,-33.7273	indel
Seq6_pilon	201082	TA	T	2585.54	1	50000	63	27	988	36	3853	-347.84,-89.2859	indel
Seq10_pilon	717281	C	CT	2619.75	1	50000	57	19	671	35	3575	-382.926,-332.71,-70.7355	indel
Seq17_pilon	31270	A	AG	2621.24	1	50000	39	1	39	30	2946	-269.613,-291.279,-29.1556	indel
Seq13_pilon	404558	TA	T	2633.23	1	50000	42	11	407	31	3325	-300.323,-37	indel
Seq13_pilon	861038	CT	C	2686.95	1	50000	52	17	580	35	3558	-321.237,-52.5412	indel
Seq13_pilon	893080	T	TA	2698.88	1	50000	69	26	892	37	3884	-430.598,-369.232,-99.3438	indel
Seq3_pilon	169418	T	TA	2710.34	1	50000	33	3	117	29	3121	-292.432,-285.002,-13.9675	indel
Seq5_pilon	270159	CT	C	2719.53	1	50000	43	11	418	32	3432	-309.953,-38	indel
Seq7_pilon	392523	TA	T	2754.16	1	50000	48	13	467	35	3520	-317.806,-42.3892	indel
Seq15_pilon	71002	C	CT	2756.85	1	50000	49	13	473	33	3529	-361.05,-328.792,-53.1063	indel
Seq7_pilon	910884	AT	A	2777.35	1	50000	58	22	791	36	3869	-349.285,-71.5495	indel
Seq10_pilon	477405	G	GA	2795.49	1	50000	61	21	764	36	3863	-417.242,-361.451,-81.9024	indel
Seq4_pilon	1306685	CT	C	2801.26	1	50000	40	8	314	32	3419	-308.778,-28.6525	indel
Seq10_pilon	383072	TA	T	2804.52	1	50000	45	12	441	32	3549	-360.007,-321.298,-40.8462	indel
Seq15_pilon	138156	TA	T	2804.61	1	50000	52	18	664	34	3772	-340.589,-60.1289	indel
Seq15_pilon	92744	TA	T	2847.9	1	50000	55	20	709	35	3865	-348.954,-64.1645	indel
Seq12_pilon	478016	TG	AA	2874.45	1	50000	594	364	12882	230	16072	-1447.18,-1159.73	mnp
Seq10_pilon	684222	CT	C	2892.63	1	50000	51	16	570	35	3776	-340.919,-51.6563	indel
Seq10_pilon	152761	CA	C	2911.53	1	50000	43	10	366	33	3593	-324.459,-33.306	indel
Seq12_pilon	359121	G	GT	2964.9	1	50000	49	12	450	35	3737	-377.721,-343.208,-46.7179	indel
Seq15_pilon	14227	G	GA	2967.84	1	50000	50	14	354	35	3643	-360.546,-329.424,-32.64	indel
Seq4_pilon	1663	AG	A	2969.69	1	50000	34	3	94	31	3385	-305.742,-8.77333	indel
Seq7_pilon	809027	AT	A	2972.34	1	50000	49	13	470	36	3765	-339.896,-42.6615	indel
Seq17_pilon	32243	G	T	3000.78	1	50000	88	0	0	88	3330	-300.078,0	snp
Seq8_pilon	92963	GA	G	3024.35	1	50000	56	19	590	37	3942	-355.845,-53.4105	indel
Seq16_pilon	814634	GA	G	3177.78	1	50000	64	23	766	40	4289	-455.752,-396.893,-79.1146	indel
Seq10_pilon	194756	C	CA	3206.9	1	50000	66	22	806	41	4362	-465.94,-403.316,-82.6256	indel
Seq17_pilon	71014	C	CG	3282.23	1	50000	103	48	1725	54	5365	-638.795,-486.801,-158.579	indel
Seq15_pilon	723017	AG	A	3286.38	1	50000	53	13	448	40	4092	-369.303,-40.6646	indel
Seq4_pilon	1034507	AT	A	3290.47	1	50000	40	5	184	35	3832	-345.975,-16.928	indel
Seq4_pilon	2307	TA	T	3308.38	1	50000	34	0	0	34	3664	-330.838,0	indel
Seq4_pilon	795382	AT	A	3332.82	1	50000	51	13	474	38	4169	-376.307,-43.0246	indel
Seq10_pilon	186587	GA	G	3388.76	1	50000	54	15	530	39	4287	-386.929,-48.0533	indel
Seq8_pilon	11128	GA	G	3467.99	1	50000	56	16	567	40	4412	-398.183,-51.3844	indel
Seq4_pilon	887372	AT	A	3653.84	1	50000	58	15	549	43	4601	-415.16,-49.776	indel
Seq17_pilon	16508	T	TG	4256.8	1	50000	140	71	2484	68	7206	-872.797,-652.289,-226.609	indel
Seq4_pilon	2456	GC	G	4443.61	1	50000	47	2	72	45	5001	-451.201,-6.84	indel
Seq17_pilon	83443	A	T	5535.86	1	50000	184	8	308	169	6459	-622.732,-606.082,-52.496	snp
Seq12_pilon	478017	G	A	7556.69	1	50000	275	19	614	256	9010	-811.252,-55.5832	snp
Seq12_pilon	477748	C	T	7652.75	1	50000	278	14	469	264	8972	-807.82,-42.545	snp
Seq12_pilon	477613	T	A	7675.74	1	50000	448	83	2925	361	11454	-1306.4,-1045.22,-277.644	snp
Seq17_pilon	33762	AT	A	9272.69	1	50000	253	118	4384	134	14679	-1716.43,-1324.54,-397.271	indel
Seq12_pilon	478814	GG	CC	9509.47	1	50000	357	38	1411	166	11975	-1210.26,-1567.09,-616.138	mnp
Seq17_pilon	8298	A	AT	18853.1	1	50000	269	53	1955	206	22895	-2265.43,-2090.51,-205.201	indel
Seq7_pilon	624399	C	CT	26772.8	1	50000	342	38	1302	304	31042	-2794.8,-117.523	indel
Seq12_pilon	477743	T	C	38172.2	1	50000	1465	9	330	1254	42744	-4221.88,-4542.29,-725.062	snp
Seq12_pilon	478150	C	T	49314.7	1	50000	8540	13	455	8173	293590	-27695.3,-27658.4,-1276.23	snp

## Sheet: G688D
#CHROM	POS	REF	ALT	QUAL	GT	GQ	DP	RA	QR	AA	QA	GL	TYPE
Seq2_pilon	253392	CT	C	180.926	1	50000	41	29	964	12	1158	-105.185,-87.0924	indel
Seq15_pilon	111075	A	G	184.829	1	50000	14	3	102	9	308	-40.9369,-39.0909,-20.608	snp
Seq5_pilon	116964	T	A	199.436	1	50000	34	13	485	21	707	-63.9667,-44.0231	snp
Seq5_pilon	116991	C	T	205.963	1	50000	88	40	1474	48	1703	-153.625,-133.029	snp
Seq16_pilon	763031	GA	G	216.282	1	50000	49	34	1214	14	1447	-240.044,-140.805,-119.177	indel
Seq2_pilon	268781	CT	C	226.323	1	50000	42	27	855	11	1101	-176.555,-108.8,-86.1677	indel
Seq8_pilon	115681	GT	G	231.954	1	50000	35	23	851	11	1102	-176.344,-109.182,-85.9863	indel
Seq4_pilon	1416568	GA	G	241.432	1	50000	43	30	1038	13	1299	-117.909,-93.766	indel
Seq14_pilon	504777	CT	C	246.798	1	50000	36	26	770	10	1036	-94.276,-69.5962	indel
Seq5_pilon	70758	T	TA	254.289	1	50000	41	23	798	10	1076	-169.228,-124.061,-98.6323	indel
Seq4_pilon	111	C	A	260.772	1	50000	18	5	126	13	415	-37.6692,-11.592	snp
Seq15_pilon	747314	CA	C	273.314	1	50000	23	15	551	8	847	-77.2888,-49.9573	indel
Seq12_pilon	1037246	AT	A	278.806	1	50000	24	16	517	8	819	-74.7338,-46.8531	indel
Seq14_pilon	500096	GT	G	285.53	1	50000	40	26	893	13	1204	-189.268,-118.11,-89.557	indel
Seq5_pilon	512732	GA	G	313.838	1	50000	20	12	423	8	765	-69.8063,-38.4225	indel
Seq2_pilon	469836	CT	C	324.833	1	50000	28	18	606	10	960	-87.36,-54.8767	indel
Seq4_pilon	541659	A	G	363.636	1	50000	11	0	0	11	400	-36.3636,0	snp
Seq11_pilon	655671	AT	A	367.973	1	50000	30	19	658	11	1060	-96.3636,-59.5663	indel
Seq15_pilon	1005729	GT	G	368.492	1	50000	20	12	400	8	802	-73.1825,-36.3333	indel
Seq12_pilon	538404	C	CA	375.872	1	50000	31	16	583	10	996	-142.717,-104.992,-67.4048	indel
Seq17_pilon	31270	A	AG	389.391	1	50000	10	1	36	5	465	-45.925,-54.2111,-15.272	indel
Seq16_pilon	189803	GA	G	399.749	1	50000	33	20	738	12	1176	-172.858,-107.289,-67.3143	indel
Seq4_pilon	634654	GT	G	416	1	50000	14	7	256	7	711	-65.0057,-23.4057	indel
Seq2_pilon	802120	AT	A	419.917	1	50000	42	27	962	15	1422	-128.928,-86.9363	indel
Seq15_pilon	349855	GA	G	435.209	1	50000	36	22	802	13	1279	-187.885,-124.46,-80.9391	indel
Seq13_pilon	21103	AT	A	439.412	1	50000	33	21	652	11	1133	-161.208,-103.732,-59.7905	indel
Seq7_pilon	606851	GA	G	460.344	1	50000	17	9	320	8	824	-75.19,-29.1556	indel
Seq4_pilon	1270720	CT	C	460.937	1	50000	43	28	992	15	1497	-135.728,-89.6343	indel
Seq3_pilon	223447	C	CT	462.904	1	50000	28	16	573	11	1081	-149.473,-100.643,-54.3529	indel
Seq15_pilon	746061	CA	C	463.133	1	50000	21	12	432	9	939	-85.5533,-39.24	indel
Seq7_pilon	1011419	C	CT	472.333	1	50000	19	7	221	7	741	-107.481,-94.83,-47.5967	indel
Seq14_pilon	381607	GA	G	482.318	1	50000	14	6	206	7	735	-85.4138,-68.4375,-20.2057	indel
Seq3_pilon	56723	CA	C	482.526	1	50000	20	8	170	7	701	-85.6406,-76.6633,-28.4108	indel
Seq12_pilon	705624	GT	G	488.023	1	50000	30	19	671	11	1205	-109.545,-60.7432	indel
Seq3_pilon	8006	CT	C	506.456	1	50000	25	14	514	11	1070	-97.2727,-46.6271	indel
Seq4_pilon	481861	GA	G	507.056	1	50000	35	22	756	13	1312	-119.089,-68.3836	indel
Seq9_pilon	246346	GT	G	519.184	1	50000	40	26	916	14	1485	-134.711,-82.7923	indel
Seq7_pilon	850360	GA	G	526.579	1	50000	39	24	831	14	1409	-202.189,-138.267,-85.6088	indel
Seq15_pilon	664656	TC	T	529.967	1	50000	47	31	1136	16	1717	-155.603,-102.606	indel
Seq15_pilon	537684	AT	A	543.512	1	50000	23	11	412	10	1010	-128.657,-100.825,-46.4738	indel
Seq8_pilon	206259	A	AT	549.55	1	50000	26	14	514	11	1118	-147.533,-104.822,-49.8667	indel
Seq16_pilon	778723	CT	C	573.296	1	50000	43	28	970	15	1599	-144.976,-87.6464	indel
Seq17_pilon	87841	TA	AT	573.422	1	50000	40	21	779	19	1412	-127.823,-70.481	mnp
Seq2_pilon	593830	TA	T	573.521	1	50000	27	13	415	12	1047	-133.046,-96.7921,-39.44	indel
Seq15_pilon	978501	C	CT	575.485	1	50000	35	20	669	13	1302	-177.987,-124.304,-66.7555	indel
Seq13_pilon	785533	C	CT	576.377	1	50000	21	11	382	10	1015	-92.365,-34.7273	indel
Seq11_pilon	9215	T	TA	576.525	1	50000	25	13	433	11	1067	-135.625,-106.548,-48.895	indel
Seq13_pilon	698989	T	TA	578.78	1	50000	44	26	762	15	1399	-203.577,-141.086,-83.2076	indel
Seq12_pilon	502042	CA	C	579.859	1	50000	32	19	683	13	1320	-119.815,-61.8295	indel
Seq12_pilon	608030	TA	T	605.998	1	50000	28	16	503	12	1169	-106.184,-45.5844	indel
Seq7_pilon	85087	GA	G	606.21	1	50000	13	5	202	8	868	-79.205,-18.584	indel
Seq5_pilon	408703	GA	G	617.767	1	50000	26	14	504	11	1183	-152.505,-116.63,-54.8533	indel
Seq7_pilon	999691	TA	T	626.815	1	50000	43	27	946	16	1635	-148.172,-85.4904	indel
Seq16_pilon	938820	AT	A	639.75	1	50000	28	16	572	12	1275	-115.813,-51.8375	indel
Seq2_pilon	808927	CT	C	640.375	1	50000	24	12	448	12	1153	-104.731,-40.6933	indel
Seq15_pilon	111087	A	C	658.84	1	50000	20	0	0	20	728	-65.884,0	snp
Seq12_pilon	27549	CT	C	683.612	1	50000	41	24	864	17	1617	-146.481,-78.12	indel
Seq10_pilon	606693	C	CA	686.046	1	50000	39	23	846	15	1601	-220.874,-147.9,-79.2954	indel
Seq5_pilon	33839	C	CT	697.108	1	50000	25	12	447	12	1215	-150.273,-113.371,-43.66	indel
Seq4_pilon	823128	A	G	713.521	1	50000	24	0	0	22	793	-75.6035,-78.5721,-7.22	snp
Seq5_pilon	116999	T	C	718.209	1	50000	105	42	1585	63	2383	-214.848,-143.027	snp
Seq8_pilon	284465	C	CA	719.8	1	50000	25	12	419	12	1212	-147.47,-112.735,-40.7554	indel
Seq1_pilon	23872	CT	C	739.849	1	50000	19	8	311	11	1126	-102.364,-28.3788	indel
Seq15_pilon	301581	G	A	742.581	1	50000	28	2	67	26	892	-80.6231,-6.365	snp
Seq4_pilon	287031	CT	C	745.012	1	50000	50	30	1120	19	1941	-276.115,-176.656,-102.155	indel
Seq7_pilon	482499	G	GC	746.189	1	50000	18	6	218	11	1041	-114.051,-95.6475,-21.0286	indel
Seq10_pilon	395040	CA	C	747.58	1	50000	20	9	298	11	1121	-101.909,-27.1511	indel
Seq7_pilon	119798	GA	G	750.897	1	50000	23	11	389	12	1216	-110.453,-35.3636	indel
Seq13_pilon	667515	CA	C	759.52	1	50000	54	33	1192	20	2029	-290.498,-186.743,-110.791	indel
Seq6_pilon	104745	CA	C	762.248	1	50000	48	30	1119	18	1958	-177.308,-101.083	indel
Seq14_pilon	322582	A	AT	762.296	1	50000	44	26	953	18	1793	-162.366,-86.1365	indel
Seq12_pilon	624282	GA	G	767.69	1	50000	44	26	930	18	1776	-160.827,-84.0577	indel
Seq13_pilon	776796	A	AT	773.095	1	50000	71	45	1597	24	2449	-375.355,-235.723,-158.414	indel
Seq14_pilon	284126	C	CA	783.338	1	50000	25	12	431	12	1294	-155.969,-120.269,-41.9354	indel
Seq16_pilon	467355	CT	C	783.349	1	50000	68	44	1612	24	2475	-223.781,-145.446	indel
Seq7_pilon	606238	T	TA	788.19	1	50000	28	12	431	13	1301	-165.585,-132.766,-53.9467	indel
Seq16_pilon	302696	TA	T	788.913	1	50000	42	25	904	17	1773	-160.613,-81.7216	indel
Seq5_pilon	117030	G	A	789.124	1	50000	92	33	1245	59	2122	-191.34,-112.427	snp
Seq12_pilon	211473	AT	A	798.55	1	50000	33	18	480	14	1360	-166.175,-123.941,-44.0863	indel
Seq5_pilon	270159	CT	C	819.936	1	50000	23	11	382	12	1285	-116.721,-34.7273	indel
Seq13_pilon	739337	T	C	831.526	1	50000	28	1	16	26	939	-86.3037,-88.4726,-5.32	snp
Seq9_pilon	353585	CT	C	844.976	1	50000	50	31	1068	19	1999	-180.962,-96.4645	indel
Seq14_pilon	236564	CT	C	857.411	1	50000	21	9	347	12	1292	-117.357,-31.6156	indel
Seq7_pilon	608638	C	CA	857.544	1	50000	48	28	990	20	1936	-175.208,-89.4536	indel
Seq5_pilon	514921	AT	A	867.04	1	50000	43	23	836	18	1793	-247.433,-173.036,-86.332	indel
Seq2_pilon	496673	C	CA	874.364	1	50000	39	22	818	17	1782	-161.428,-73.9918	indel
Seq13_pilon	51088	C	CT	880.004	1	50000	36	20	753	16	1723	-156.147,-68.1465	indel
Seq5_pilon	118074	C	T	881.09	1	50000	140	56	2061	83	3040	-459.457,-276.125,-188.016	snp
Seq5_pilon	117088	G	A	882.098	1	50000	108	40	1453	65	2433	-353.71,-229.965,-141.755	snp
Seq5_pilon	218650	TA	T	883.469	1	50000	27	12	444	14	1419	-168.387,-135.365,-47.0185	indel
Seq4_pilon	490436	G	T	886.093	1	50000	30	0	0	27	985	-92.7064,-100.089,-11.48	snp
Seq13_pilon	348889	CT	C	899.272	1	50000	40	21	690	19	1683	-152.356,-62.4286	indel
Seq4_pilon	692339	CT	C	902.915	1	50000	25	12	372	13	1367	-124.082,-33.79	indel
Seq15_pilon	228059	A	G	908.693	1	50000	30	0	0	29	1010	-91.2483,-94.6693,-3.8	snp
Seq6_pilon	111801	CA	C	911.664	1	50000	43	24	884	19	1890	-171.095,-79.9283	indel
Seq15_pilon	16214	G	GA	914.075	1	50000	23	10	381	13	1389	-126.078,-34.671	indel
Seq15_pilon	962247	TA	T	917.549	1	50000	34	18	610	16	1622	-146.994,-55.2389	indel
Seq4_pilon	1015788	A	AT	923.924	1	50000	43	23	765	18	1785	-230.122,-166.882,-74.4896	indel
Seq4_pilon	32971	C	G	925.722	1	50000	32	0	0	28	1028	-97.289,-103.95,-11.3775	snp
Seq16_pilon	757500	GA	G	939.131	1	50000	37	20	722	17	1758	-159.254,-65.341	indel
Seq6_pilon	38611	G	T	943.373	1	50000	30	0	0	29	1047	-94.591,-96.8373,-2.5	snp
Seq5_pilon	117646	G	T	948.351	1	50000	129	47	1787	80	2841	-420.485,-263.336,-168.501	snp
Seq12_pilon	629366	GA	G	956.489	1	50000	58	31	1105	21	2162	-303.44,-210.563,-114.914	indel
Seq5_pilon	116963	C	CT	958.236	1	50000	59	35	1243	24	2301	-208.049,-112.225	indel
Seq2_pilon	154	AC	A	971.808	1	50000	15	3	77	12	1149	-104.368,-7.18667	indel
Seq8_pilon	301103	GA	G	972.852	1	50000	26	12	430	14	1503	-136.344,-39.0583	indel
Seq12_pilon	22196	AT	A	974.277	1	50000	40	22	797	18	1872	-169.52,-72.0923	indel
Seq13_pilon	790889	G	A	993.767	1	50000	30	0	0	29	1103	-99.6503,-102.077,-2.7	snp
Seq4_pilon	1088251	GA	G	1013.51	1	50000	37	19	674	18	1793	-162.366,-61.0147	indel
Seq3_pilon	214772	C	A	1018.42	1	50000	33	0	0	32	1131	-102.143,-104.842,-3	snp
Seq4_pilon	752802	TA	T	1020.2	1	50000	31	15	562	16	1688	-152.975,-50.9547	indel
Seq11_pilon	636195	GA	G	1033.35	1	50000	33	17	600	16	1740	-157.688,-54.3529	indel
Seq7_pilon	794760	GT	G	1046.33	1	50000	38	20	751	18	1906	-172.599,-67.9655	indel
Seq11_pilon	230764	TA	T	1050.85	1	50000	38	20	732	18	1892	-171.331,-66.246	indel
Seq9_pilon	308565	G	T	1054.65	1	50000	35	0	0	34	1172	-105.825,-109.065,-3.6	snp
Seq14_pilon	198790	A	AT	1063.9	1	50000	99	64	2189	34	3364	-500.337,-314.375,-207.985	indel
Seq8_pilon	38868	CT	C	1076.25	1	50000	66	41	1471	25	2659	-240.374,-132.749	indel
Seq12_pilon	851055	C	CT	1077.27	1	50000	33	15	456	17	1646	-189.837,-152.767,-45.0406	indel
Seq5_pilon	320949	TA	T	1084.32	1	50000	30	14	516	16	1713	-155.241,-46.8086	indel
Seq8_pilon	306843	CT	C	1084.56	1	50000	42	22	814	20	2012	-182.086,-73.63	indel
Seq3_pilon	107992	G	GA	1085.59	1	50000	53	28	910	22	2110	-272.404,-200.417,-91.8581	indel
Seq6_pilon	61701	GT	G	1087.45	1	50000	54	31	1184	23	2385	-215.687,-106.942	indel
Seq13_pilon	763060	GT	G	1090.26	1	50000	61	34	1277	25	2482	-349.035,-235.686,-126.66	indel
Seq2_pilon	382073	T	C	1092.48	1	50000	34	0	0	33	1214	-109.628,-113.048,-3.8	snp
Seq17_pilon	83443	A	T	1095.52	1	50000	43	4	130	35	1347	-137,-136.197,-26.645	snp
Seq11_pilon	138146	CT	C	1103.14	1	50000	25	10	353	15	1571	-142.437,-32.123	indel
Seq5_pilon	259181	GA	G	1104.37	1	50000	29	12	422	16	1642	-186.497,-150.829,-40.3923	indel
Seq2_pilon	741181	A	C	1110.16	1	50000	36	0	0	34	1234	-115.114,-118.806,-7.79	snp
Seq5_pilon	34644	C	A	1116.83	1	50000	35	0	0	35	1237	-111.683,0	snp
Seq14_pilon	519030	T	G	1118.85	1	50000	33	0	0	33	1239	-111.885,0	snp
Seq17_pilon	32243	G	T	1119.65	1	50000	34	0	0	34	1240	-111.965,0	snp
Seq13_pilon	21090	CT	C	1121.99	1	50000	32	15	514	17	1753	-158.801,-46.6027	indel
Seq15_pilon	141746	GA	G	1125.79	1	50000	41	22	762	19	2005	-181.505,-68.9264	indel
Seq15_pilon	582095	C	CA	1128.36	1	50000	39	19	669	20	1916	-173.398,-60.5621	indel
Seq3_pilon	332210	TA	T	1143.58	1	50000	24	8	278	15	1542	-164.591,-150.256,-35.8978	indel
Seq8_pilon	270130	CT	C	1146.25	1	50000	39	20	725	19	1991	-180.238,-65.6125	indel
Seq16_pilon	857881	A	G	1154.28	1	50000	36	0	0	35	1283	-115.837,-119.528,-4.1	snp
Seq9_pilon	58721	G	GT	1157.61	1	50000	25	9	305	16	1584	-143.55,-27.7889	indel
Seq2_pilon	302216	A	AT	1173.26	1	50000	34	16	494	18	1790	-162.094,-44.7688	indel
Seq16_pilon	86210	CT	C	1190.54	1	50000	34	15	563	19	1879	-170.099,-51.0453	indel
Seq15_pilon	94095	TA	T	1200.16	1	50000	29	12	423	17	1749	-158.439,-38.4225	indel
Seq2_pilon	745465	GA	G	1207.59	1	50000	26	10	360	16	1694	-153.519,-32.76	indel
Seq15_pilon	550954	AT	A	1216.24	1	50000	32	14	518	18	1862	-168.614,-46.99	indel
Seq7_pilon	982268	GT	G	1229.77	1	50000	32	15	534	17	1892	-171.393,-48.416	indel
Seq2_pilon	718555	T	TA	1237.96	1	50000	20	5	195	14	1563	-159.145,-145.429,-21.6333	indel
Seq15_pilon	1075619	TA	T	1247.63	1	50000	38	18	666	20	2045	-185.073,-60.31	indel
Seq13_pilon	56997	G	GA	1252.04	1	50000	21	5	181	15	1565	-158.013,-144.638,-19.4333	indel
Seq17_pilon	71014	C	CG	1254.77	1	50000	43	20	720	23	2108	-190.637,-65.16	indel
Seq6_pilon	224052	AT	A	1256.8	1	50000	31	13	478	18	1867	-169.067,-43.3877	indel
Seq4_pilon	541679	T	C	1280.65	1	50000	40	0	0	40	1419	-128.065,0	snp
Seq7_pilon	210057	GT	G	1283.68	1	50000	41	20	745	21	2164	-195.79,-67.4225	indel
Seq5_pilon	153927	GA	G	1284.03	1	50000	27	9	335	18	1755	-158.925,-30.5222	indel
Seq6_pilon	156184	CT	C	1298.48	1	50000	23	7	248	16	1683	-152.522,-22.6743	indel
Seq12_pilon	640348	G	GT	1301.09	1	50000	54	30	1082	24	2520	-227.85,-97.7407	indel
Seq15_pilon	826281	G	A	1310.01	1	50000	42	0	0	40	1456	-131.404,-138.696,-7.695	snp
Seq14_pilon	302576	TA	T	1327.67	1	50000	28	11	394	17	1861	-168.585,-35.8182	indel
Seq13_pilon	209396	CT	C	1332.74	1	50000	47	23	855	23	2329	-287.252,-213.293,-80.0188	indel
Seq10_pilon	114223	A	AT	1334.69	1	50000	33	13	489	19	1965	-221.627,-179.733,-46.2643	indel
Seq13_pilon	542288	A	G	1364.23	1	50000	44	0	0	43	1516	-136.793,-140.123,-3.7	snp
Seq2_pilon	580814	A	AT	1366.99	1	50000	39	17	647	21	2159	-253.278,-198.095,-61.3967	indel
Seq7_pilon	143467	GA	G	1375.44	1	50000	18	3	101	15	1621	-146.971,-9.42667	indel
Seq4_pilon	522414	CT	C	1375.64	1	50000	43	21	795	22	2316	-209.493,-71.9286	indel
Seq9_pilon	141279	GA	G	1376.88	1	50000	57	32	1128	25	2650	-239.56,-101.873	indel
Seq15_pilon	991177	GA	G	1377.28	1	50000	61	34	1231	27	2754	-248.88,-111.152	indel
Seq13_pilon	406580	TA	T	1379.56	1	50000	43	20	721	23	2247	-203.207,-65.2505	indel
Seq13_pilon	618496	CA	C	1383.93	1	50000	40	19	707	21	2237	-202.395,-64.0021	indel
Seq15_pilon	129487	CT	C	1393.37	1	50000	41	19	741	22	2282	-206.417,-67.08	indel
Seq12_pilon	607821	G	A	1402.11	1	50000	47	0	0	43	1558	-143.281,-153.993,-13.7825	snp
Seq8_pilon	231289	C	T	1410.89	1	50000	47	0	0	44	1568	-144.897,-152.009,-10.92	snp
Seq13_pilon	512443	GT	G	1414.71	1	50000	44	22	762	22	2326	-210.397,-68.9264	indel
Seq4_pilon	471096	AT	A	1424.33	1	50000	42	20	722	22	2297	-207.774,-65.341	indel
Seq5_pilon	359204	CT	C	1431.06	1	50000	24	7	243	17	1825	-165.324,-22.2171	indel
Seq3_pilon	41617	C	CT	1431.5	1	50000	26	6	213	17	1797	-181.774,-173.217,-30.0667	indel
Seq6_pilon	172063	CT	C	1431.71	1	50000	39	18	661	21	2244	-203.029,-59.8572	indel
Seq11_pilon	459246	TA	T	1434.24	1	50000	28	9	308	18	1894	-198.996,-172.362,-28.938	indel
Seq15_pilon	769021	G	GA	1437.05	1	50000	69	38	1366	30	2956	-389.616,-269.884,-126.178	indel
Seq4_pilon	595523	TA	T	1438.84	1	50000	30	11	375	19	1966	-177.975,-34.0909	indel
Seq12_pilon	304626	CT	C	1448.79	1	50000	58	32	1154	26	2756	-249.1,-104.221	indel
Seq16_pilon	45047	T	TA	1457.87	1	50000	46	21	739	23	2352	-278.893,-218.587,-72.8	indel
Seq12_pilon	388302	C	CA	1469.36	1	50000	37	14	523	21	2149	-241.243,-199.951,-53.0156	indel
Seq12_pilon	430981	GA	G	1478.08	1	50000	34	14	404	19	2038	-220.52,-185.616,-37.808	indel
Seq6_pilon	34001	C	A	1480.47	1	50000	46	0	0	46	1641	-148.047,0	snp
Seq15_pilon	720957	GA	G	1482.92	1	50000	39	16	610	22	2251	-258.243,-214.24,-65.9482	indel
Seq10_pilon	540836	C	T	1487.67	1	50000	46	0	0	45	1653	-149.137,-152.467,-3.7	snp
Seq12_pilon	331056	C	CT	1511.51	1	50000	38	16	524	22	2196	-198.638,-47.4875	indel
Seq12_pilon	54338	A	AT	1515.79	1	50000	28	8	296	19	1973	-205.05,-179.824,-28.2444	indel
Seq13_pilon	860983	C	CT	1536.42	1	50000	37	16	521	21	2220	-200.857,-47.2156	indel
Seq16_pilon	794284	G	GA	1540.32	1	50000	38	16	603	22	2307	-208.679,-54.6469	indel
Seq4_pilon	1367116	AT	A	1541.65	1	50000	35	14	501	20	2206	-244.426,-200.495,-46.3307	indel
Seq7_pilon	101852	G	T	1542.51	1	50000	46	0	0	45	1714	-154.641,-158.151,-3.9	snp
Seq15_pilon	214144	CA	C	1550.14	1	50000	60	32	1143	28	2858	-258.241,-103.227	indel
Seq10_pilon	42081	AT	A	1562.59	1	50000	37	16	564	21	2292	-207.371,-51.1125	indel
Seq2_pilon	607344	AT	A	1571.47	1	50000	40	18	620	22	2358	-213.292,-56.1444	indel
Seq9_pilon	76057	C	T	1578.32	1	50000	50	0	0	48	1754	-161.736,-165.337,-7.505	snp
Seq4_pilon	854201	TA	T	1579.9	1	50000	33	13	421	20	2168	-196.204,-38.2138	indel
Seq7_pilon	686081	C	A	1581.01	1	50000	54	1	35	49	1792	-168.486,-176.409,-18.308	snp
Seq8_pilon	527117	CA	C	1604.75	1	50000	39	17	614	22	2389	-216.096,-55.6212	indel
Seq10_pilon	124527	GA	G	1613.91	1	50000	43	17	622	26	2409	-217.737,-56.3459	indel
Seq2_pilon	676345	CA	C	1614.05	1	50000	36	15	497	21	2282	-206.467,-45.0613	indel
Seq14_pilon	481189	T	A	1622.72	1	50000	127	51	850	76	2651	-238.939,-76.6667	snp
Seq10_pilon	100269	A	AT	1630.96	1	50000	45	19	630	23	2435	-280.607,-225.148,-62.0518	indel
Seq5_pilon	404661	G	T	1631.46	1	50000	51	0	0	49	1813	-163.54,-170.651,-7.505	snp
Seq12_pilon	477611	ATT	CTA	1658.34	1	50000	685	439	13841	244	15680	-2658.13,-1415.53,-1249.69	complex
Seq10_pilon	383072	TA	T	1667.89	1	50000	34	13	476	21	2321	-209.995,-43.2062	indel
Seq4_pilon	1392197	G	A	1674.94	1	50000	54	0	0	50	1861	-173.801,-181.092,-13.5975	snp
Seq5_pilon	117579	G	A	1678.48	1	50000	116	30	1066	83	2931	-363.414,-273.683,-105.835	snp
Seq2_pilon	265412	CT	C	1683.88	1	50000	56	29	1090	27	2953	-266.864,-98.4759	indel
Seq4_pilon	507355	GA	G	1684.8	1	50000	28	8	283	20	2147	-194.304,-25.8238	indel
Seq4_pilon	921206	TA	T	1687.05	1	50000	45	20	715	25	2582	-233.413,-64.7075	indel
Seq4_pilon	625873	C	CT	1688.68	1	50000	27	6	204	20	2073	-205.806,-191.176,-22.3086	indel
Seq15_pilon	771028	A	AT	1691.43	1	50000	69	37	1308	30	3180	-404.59,-294.599,-125.456	indel
Seq8_pilon	51199	CT	C	1703.11	1	50000	77	43	1582	33	3467	-455.074,-313.953,-143.642	indel
Seq7_pilon	649207	G	C	1710.37	1	50000	55	0	0	52	1900	-172.982,-180.183,-9.14667	snp
Seq4_pilon	371492	TA	T	1729.9	1	50000	24	5	188	19	2102	-190.286,-17.296	indel
Seq9_pilon	346441	T	TA	1732.38	1	50000	27	7	270	20	2187	-197.924,-24.6857	indel
Seq13_pilon	4077	AT	A	1741.99	1	50000	36	13	476	23	2404	-217.405,-43.2062	indel
Seq13_pilon	718676	AT	A	1757.13	1	50000	42	17	613	25	2558	-231.243,-55.5306	indel
Seq10_pilon	284567	AT	A	1762.2	1	50000	58	30	975	28	2925	-264.295,-88.075	indel
Seq11_pilon	254145	A	AT	1763.08	1	50000	52	23	751	27	2703	-311.551,-250.074,-73.7664	indel
Seq13_pilon	814424	C	CA	1772.49	1	50000	33	10	358	22	2320	-241.857,-212.612,-35.3636	indel
Seq4_pilon	423236	TA	T	1774.57	1	50000	48	22	829	26	2793	-252.444,-74.9868	indel
Seq14_pilon	13404	CT	C	1777.58	1	50000	58	30	1056	28	3023	-273.15,-95.392	indel
Seq13_pilon	514430	AT	A	1781.36	1	50000	56	27	954	29	2926	-264.349,-86.2133	indel
Seq3_pilon	169418	T	TA	1781.85	1	50000	29	6	227	21	2200	-219.329,-205.377,-27.1925	indel
Seq1_pilon	128779	AT	A	1808.39	1	50000	82	46	1711	36	3713	-335.201,-154.362	indel
Seq2_pilon	798015	A	AT	1828.31	1	50000	42	16	552	24	2576	-282.302,-239.881,-57.05	indel
Seq5_pilon	267557	CT	C	1848.22	1	50000	41	16	608	25	2654	-239.922,-55.1	indel
Seq5_pilon	117869	A	G	1859.42	1	50000	134	39	1445	94	3511	-446.413,-320.504,-134.563	snp
Seq15_pilon	71002	C	CT	1881.84	1	50000	37	13	436	24	2519	-227.76,-39.5754	indel
Seq4_pilon	242488	CT	C	1883.61	1	50000	30	8	298	22	2383	-215.553,-27.1925	indel
Seq12_pilon	447413	C	CA	1895.59	1	50000	42	15	516	25	2615	-282.573,-243.096,-53.5376	indel
Seq5_pilon	490888	GA	G	1900.33	1	50000	50	22	808	28	2912	-263.12,-73.0873	indel
Seq12_pilon	629975	A	G	1900.66	1	50000	59	0	0	57	2112	-193.69,-197.381,-7.315	snp
Seq7_pilon	707649	CA	C	1913.71	1	50000	31	9	323	22	2441	-220.8,-29.4289	indel
Seq4_pilon	170037	T	TA	1917.76	1	50000	40	14	392	24	2515	-262.395,-233.283,-41.5063	indel
Seq10_pilon	134928	GA	G	1921.17	1	50000	39	14	521	25	2648	-239.379,-47.2621	indel
Seq10_pilon	72028	GA	G	1933.71	1	50000	34	10	362	24	2503	-226.313,-32.942	indel
Seq10_pilon	638305	AT	A	1946.28	1	50000	52	23	827	28	2982	-343.557,-276.817,-82.1888	indel
Seq15_pilon	138156	TA	T	1947.39	1	50000	43	17	638	26	2794	-252.535,-57.7953	indel
Seq12_pilon	779727	TA	T	1947.9	1	50000	42	17	597	25	2753	-248.871,-54.0812	indel
Seq10_pilon	717281	C	CT	1961.08	1	50000	49	19	702	27	2874	-322.617,-267.387,-71.2782	indel
Seq13_pilon	309718	TA	T	1967.61	1	50000	36	12	400	24	2578	-233.094,-36.3333	indel
Seq4_pilon	1015773	CT	C	1973.42	1	50000	33	9	315	24	2500	-226.042,-28.7	indel
Seq4_pilon	1286237	GA	G	1979.2	1	50000	40	15	548	25	2739	-247.606,-49.6853	indel
Seq7_pilon	1025390	GA	G	1983.09	1	50000	55	25	942	30	3138	-283.466,-85.1568	indel
Seq2_pilon	164671	AT	A	1987.94	1	50000	46	19	714	27	2915	-263.43,-64.6358	indel
Seq7_pilon	853069	AT	A	1992.79	1	50000	52	22	747	29	2954	-333.816,-276.51,-77.2313	indel
Seq13_pilon	757907	T	TA	2000.6	1	50000	65	31	1106	34	3322	-299.957,-99.8968	indel
Seq16_pilon	819422	GA	G	2006.63	1	50000	63	31	1127	32	3349	-302.457,-101.794	indel
Seq15_pilon	770905	TA	T	2008.43	1	50000	59	28	999	31	3223	-291.11,-90.2668	indel
Seq7_pilon	696565	G	GT	2008.86	1	50000	35	11	407	24	2631	-237.886,-37	indel
Seq10_pilon	100335	TA	T	2053.66	1	50000	48	20	746	28	3020	-272.879,-67.513	indel
Seq15_pilon	660411	G	T	2094.93	1	50000	64	0	0	61	2328	-217.283,-220.973,-11.48	snp
Seq17_pilon	16508	T	TG	2096.78	1	50000	70	33	1192	35	3515	-424.322,-323.077,-113.399	indel
Seq15_pilon	14227	G	GA	2107.62	1	50000	32	7	242	24	2576	-254.529,-235.673,-24.9113	indel
Seq4_pilon	273901	TC	T	2115.11	1	50000	27	4	139	23	2481	-224.369,-12.8575	indel
Seq10_pilon	480127	A	AT	2118.97	1	50000	27	3	94	23	2440	-229.035,-221.702,-9.805	indel
Seq2_pilon	410742	G	GA	2129.8	1	50000	53	22	775	30	3134	-352.562,-286.142,-73.1617	indel
Seq13_pilon	309091	G	GA	2139.2	1	50000	45	17	589	28	2958	-267.276,-53.3565	indel
Seq13_pilon	85391	A	AT	2148.81	1	50000	48	18	603	28	2983	-323.52,-276.149,-61.2685	indel
Seq10_pilon	33961	CT	C	2166.9	1	50000	43	15	539	28	2939	-265.56,-48.8693	indel
Seq15_pilon	633622	GA	G	2172.75	1	50000	33	8	267	25	2673	-241.639,-24.3638	indel
Seq2_pilon	367733	G	GT	2186.54	1	50000	32	6	201	26	2623	-237.079,-18.425	indel
Seq14_pilon	501292	GA	G	2187.55	1	50000	37	10	386	26	2809	-288.438,-254.664,-35.9091	indel
Seq14_pilon	481182	T	A	2205.66	1	50000	120	27	410	93	2859	-257.617,-37.0519	snp
Seq10_pilon	316807	GA	G	2207.07	1	50000	80	41	1509	38	3954	-492.362,-367.434,-146.727	indel
Seq15_pilon	1075548	T	TA	2221.57	1	50000	53	18	637	31	3099	-337.002,-289.637,-67.4791	indel
Seq8_pilon	117498	GA	G	2226.76	1	50000	57	26	959	31	3425	-309.355,-86.6788	indel
Seq13_pilon	420631	G	GA	2229.15	1	50000	31	6	223	25	2692	-243.357,-20.4417	indel
Seq13_pilon	850826	T	TC	2229.73	1	50000	41	9	311	27	2782	-279.229,-265.699,-42.7264	indel
Seq4_pilon	596807	GT	G	2242.28	1	50000	60	26	909	32	3393	-393.68,-314.585,-90.3571	indel
Seq3_pilon	254577	CT	C	2248.02	1	50000	61	28	979	33	3469	-313.261,-88.4596	indel
Seq4_pilon	505653	TA	T	2292.49	1	50000	32	6	185	26	2724	-246.208,-16.9583	indel
Seq12_pilon	915002	A	AT	2297.47	1	50000	61	25	900	35	3446	-391.864,-314.618,-84.8712	indel
Seq12_pilon	663532	GA	G	2306.66	1	50000	37	10	365	27	2920	-263.881,-33.215	indel
Seq15_pilon	124257	CT	C	2331.14	1	50000	37	10	353	27	2935	-265.237,-32.123	indel
Seq14_pilon	169927	GA	G	2344.24	1	50000	38	10	363	28	2960	-267.457,-33.033	indel
Seq10_pilon	366890	GA	G	2365.42	1	50000	72	34	1223	38	3844	-346.972,-110.43	indel
Seq15_pilon	204777	GT	G	2422.65	1	50000	68	32	1180	36	3864	-348.833,-106.569	indel
Seq7_pilon	392523	TA	T	2426.29	1	50000	39	10	332	29	3020	-272.841,-30.212	indel
Seq16_pilon	973453	GA	G	2464.69	1	50000	41	11	401	30	3132	-282.924,-36.4545	indel
Seq15_pilon	820678	T	TA	2471.92	1	50000	43	12	452	29	3191	-328.759,-293.819,-46.6271	indel
Seq7_pilon	186976	GA	G	2489.48	1	50000	59	23	824	35	3583	-397.39,-332.674,-83.7258	indel
Seq4_pilon	1306685	CT	C	2500.21	1	50000	39	10	357	29	3127	-282.508,-32.487	indel
Seq14_pilon	188194	GA	G	2504.66	1	50000	51	19	705	32	3480	-314.288,-63.8211	indel
Seq9_pilon	116372	GT	G	2511.53	1	50000	59	24	859	35	3642	-328.821,-77.6679	indel
Seq4_pilon	524645	CT	C	2523.12	1	50000	58	20	698	37	3495	-378.106,-317.546,-65.2333	indel
Seq4_pilon	2087	TG	T	2530.44	1	50000	27	1	41	26	2845	-257.144,-4.1	indel
Seq15_pilon	507232	C	CA	2559.29	1	50000	50	17	634	32	3470	-370.198,-316.964,-61.0344	indel
Seq14_pilon	699479	AT	A	2562.62	1	50000	39	10	347	29	3186	-287.839,-31.577	indel
Seq4_pilon	868076	CT	C	2569.69	1	50000	50	18	621	32	3468	-313.204,-56.235	indel
Seq8_pilon	137502	CT	C	2575.25	1	50000	90	46	1655	44	4509	-406.835,-149.31	indel
Seq4_pilon	2127	TG	T	2575.82	1	50000	42	12	459	30	3313	-299.274,-41.6925	indel
Seq17_pilon	33762	AT	A	2576.61	1	50000	64	28	1034	36	3889	-351.09,-93.4293	indel
Seq12_pilon	355924	C	T	2582.89	1	50000	85	0	0	78	2870	-268.568,-282.609,-24.32	snp
Seq16_pilon	265401	C	CA	2595.41	1	50000	39	9	345	29	3221	-321.878,-294.667,-35.126	indel
Seq16_pilon	847956	CT	C	2665.43	1	50000	46	13	455	33	3409	-307.843,-41.3	indel
Seq15_pilon	1059439	TA	T	2667.25	1	50000	43	11	401	32	3357	-303.179,-36.4545	indel
Seq7_pilon	282655	CA	C	2765.97	1	50000	40	9	307	31	3372	-304.568,-27.9711	indel
Seq10_pilon	640880	TC	T	2767.7	1	50000	50	14	464	36	3532	-318.861,-42.0914	indel
Seq10_pilon	162984	TA	T	2779.39	1	50000	55	18	644	37	3725	-336.257,-58.3178	indel
Seq11_pilon	523471	CT	C	2780.13	1	50000	55	20	734	35	3815	-344.44,-66.427	indel
Seq13_pilon	442565	CT	C	2790.81	1	50000	49	15	533	34	3626	-327.406,-48.3253	indel
Seq15_pilon	723017	AG	A	2876.56	1	50000	42	9	285	33	3473	-313.622,-25.9667	indel
Seq10_pilon	684222	CT	C	2887.21	1	50000	83	40	1345	43	4545	-410.107,-121.386	indel
Seq7_pilon	792294	GA	G	2895.47	1	50000	52	17	594	35	3803	-343.357,-53.8094	indel
Seq4_pilon	232422	GT	G	2990.57	1	50000	51	15	550	36	3865	-348.924,-49.8667	indel
Seq4_pilon	677470	T	TA	2993.71	1	50000	42	6	221	32	3540	-339.48,-332.222,-32.851	indel
Seq10_pilon	165440	AT	A	2994.38	1	50000	48	13	456	35	3775	-340.829,-41.3908	indel
Seq7_pilon	855989	CA	C	3030.79	1	50000	33	1	29	32	3388	-305.979,-2.9	indel
Seq7_pilon	809027	AT	A	3070.8	1	50000	50	14	517	36	3921	-353.979,-46.8993	indel
Seq9_pilon	240012	CT	C	3085.87	1	50000	55	17	626	38	4047	-365.295,-56.7082	indel
Seq4_pilon	1436513	CT	C	3101.27	1	50000	54	16	546	38	3984	-359.608,-49.4813	indel
Seq16_pilon	706677	GT	G	3115.66	1	50000	55	17	624	38	4078	-368.093,-56.5271	indel
Seq14_pilon	411034	TA	T	3121.33	1	50000	49	13	465	36	3925	-354.34,-42.2077	indel
Seq15_pilon	92744	TA	T	3121.35	1	50000	54	17	629	37	4089	-369.115,-56.98	indel
Seq10_pilon	477405	G	GA	3158.59	1	50000	66	23	778	40	4280	-456.023,-396.211,-80.3519	indel
Seq12_pilon	505937	TA	T	3192.86	1	50000	51	13	486	38	4026	-363.399,-44.1138	indel
Seq12_pilon	359121	G	GT	3240.47	1	50000	60	19	707	41	4300	-388.049,-64.0021	indel
Seq13_pilon	826313	GA	G	3262.09	1	50000	66	23	804	43	4421	-398.918,-72.7096	indel
Seq16_pilon	320231	AT	A	3278.61	1	50000	54	15	538	39	4173	-376.64,-48.7787	indel
Seq6_pilon	211279	GT	G	3314.55	1	50000	56	16	570	40	4245	-383.111,-51.6563	indel
Seq15_pilon	392389	GA	G	3387.03	1	50000	50	12	412	38	4167	-376.127,-37.4233	indel
Seq13_pilon	893080	T	TA	3405.17	1	50000	59	16	544	41	4320	-438.613,-396.843,-56.3256	indel
Seq10_pilon	194756	C	CA	3423.4	1	50000	73	23	863	43	4660	-497.907,-443.694,-101.354	indel
Seq4_pilon	1367595	CA	C	3634.4	1	50000	49	9	311	40	4341	-391.775,-28.3356	indel
Seq12_pilon	270381	G	GA	3763.75	1	50000	78	29	973	49	5147	-464.28,-87.9055	indel
Seq15_pilon	722906	TG	T	3818.63	1	50000	58	14	513	44	4748	-428.399,-46.5364	indel
Seq11_pilon	632933	A	AT	4010.99	1	50000	82	29	1057	51	5506	-591.49,-502.531,-101.432	indel
Seq4_pilon	1663	AG	A	4103.84	1	50000	55	9	320	46	4872	-439.539,-29.1556	indel
Seq10_pilon	590477	GT	G	4146.95	1	50000	77	25	913	52	5513	-497.23,-82.5352	indel
Seq4_pilon	2307	TA	T	4542.79	1	50000	48	1	31	47	5070	-457.379,-3.1	indel
Seq5_pilon	350655	AT	A	4828.66	1	50000	76	20	685	56	6042	-544.859,-61.9925	indel
Seq17_pilon	8298	A	AT	4921.48	1	50000	72	12	445	54	5906	-572.552,-550.918,-58.7706	indel
Seq4_pilon	2456	GC	G	5034.06	1	50000	59	4	151	55	5737	-517.373,-13.9675	indel
Seq12_pilon	478016	TG	AA	8970.15	1	50000	1188	694	24509	494	34472	-3103.18,-2206.16	mnp
Seq12_pilon	477613	T	A	11567.3	1	50000	711	143	5143	566	17996	-2086.53,-1629.77,-473.042	snp
Seq12_pilon	477748	C	T	11881	1	50000	434	26	882	408	14083	-1267.82,-79.7192	snp
Seq12_pilon	478017	G	A	14319.4	1	50000	509	30	945	478	16855	-1602.35,-1520.09,-88.1548	snp
Seq12_pilon	478814	GG	CC	19070	1	50000	765	69	2573	330	23760	-3543.28,-3315.14,-1408.14	mnp
Seq7_pilon	624399	C	CT	36915.5	1	50000	433	21	710	410	41720	-3829.22,-3766.71,-75.1513	indel
Seq12_pilon	478150	C	T	49314.7	1	50000	13851	36	1125	13154	473290	-44987.7,-44894.6,-2399.78	snp
Seq12_pilon	477743	T	C	50000	1	50000	2206	30	1081	1797	61339	-6256.25,-6837.2,-1414.01	snp

## Sheet: A618V
#CHROM	POS	REF	ALT	QUAL	GT	GQ	DP	RA	QR	AA	QA	GL	TYPE
Seq4_pilon	506326	TA	T	177.663	1	50000	13	8	259	5	450	-41.4,-23.6338	indel
Seq16_pilon	417353	GA	G	180.233	1	50000	10	6	205	4	398	-36.815,-18.7917	indel
Seq9_pilon	379838	GA	G	182.268	1	50000	19	13	392	6	587	-53.8083,-35.5815	indel
Seq8_pilon	79428	C	CA	186.267	1	50000	15	9	335	5	535	-78.9214,-58.6667,-40.04	indel
Seq12_pilon	705583	CA	C	191.054	1	50000	13	7	255	5	462	-65.1275,-47.6667,-28.5613	indel
Seq7_pilon	363370	TA	T	196.475	1	50000	10	6	156	4	367	-33.9475,-14.3	indel
Seq7_pilon	97910	TA	T	199.556	1	50000	14	9	301	5	515	-47.38,-27.4244	indel
Seq7_pilon	608706	C	CT	217.25	1	50000	11	5	183	5	420	-54.873,-41.3417,-19.6167	indel
Seq15_pilon	71002	C	CT	217.267	1	50000	16	9	319	6	555	-79.2427,-53.4857,-31.759	indel
Seq4_pilon	1188676	CT	C	218.825	1	50000	20	12	396	8	634	-57.8525,-35.97	indel
Seq7_pilon	44785	CT	C	222.93	1	50000	13	8	284	5	524	-48.208,-25.915	indel
Seq8_pilon	284465	C	CA	224.827	1	50000	18	10	330	7	575	-81.9824,-56.21,-33.7273	indel
Seq14_pilon	678237	GA	G	226.295	1	50000	13	8	242	5	486	-44.712,-22.0825	indel
Seq5_pilon	547295	CA	C	233.174	1	50000	17	11	408	6	659	-60.4083,-37.0909	indel
Seq6_pilon	111801	CA	C	241.273	1	50000	17	11	388	6	648	-59.4,-35.2727	indel
Seq12_pilon	170569	TA	T	241.527	1	50000	11	6	146	5	408	-37.536,-13.3833	indel
Seq7_pilon	725225	CT	C	245.667	1	50000	11	5	161	5	429	-53.69,-40.0583,-15.4917	indel
Seq12_pilon	1003068	GA	G	246.477	1	50000	19	12	397	7	664	-60.7086,-36.0608	indel
Seq2_pilon	129007	CT	C	252.151	1	50000	19	11	356	8	631	-57.5788,-32.3636	indel
Seq5_pilon	153927	GA	G	263.83	1	50000	11	6	213	5	499	-45.908,-19.525	indel
Seq12_pilon	538404	C	CA	267.942	1	50000	18	9	248	6	541	-71.536,-59.04,-32.2458	indel
Seq13_pilon	860983	C	CT	274.058	1	50000	19	11	358	8	657	-59.9513,-32.5455	indel
Seq3_pilon	58966	G	A	275.759	1	50000	12	1	10	10	315	-29.5455,-31.0909,-3.515	snp
Seq14_pilon	481189	T	A	284.92	1	50000	22	8	155	14	470	-42.6357,-14.1438	snp
Seq1_pilon	35748	GA	G	287.49	1	50000	13	7	241	6	554	-50.7833,-22.0343	indel
Seq4_pilon	99481	GA	G	288.004	1	50000	14	8	261	6	574	-52.6167,-23.8163	indel
Seq7_pilon	978006	TA	T	295.818	1	50000	17	11	328	6	648	-59.4,-29.8182	indel
Seq2_pilon	646157	T	C	296.215	1	50000	13	0	0	12	330	-29.975,-33.2215,-3.6	snp
Seq8_pilon	64636	CT	C	296.624	1	50000	13	7	227	6	550	-50.4167,-20.7543	indel
Seq7_pilon	1012323	GT	G	299.386	1	50000	13	7	232	6	558	-51.15,-21.2114	indel
Seq12_pilon	785638	AT	A	308.498	1	50000	13	7	209	6	545	-49.9583,-19.1086	indel
Seq16_pilon	467355	CT	C	308.715	1	50000	25	16	531	9	867	-78.9933,-48.1219	indel
Seq14_pilon	501292	GA	G	310.524	1	50000	17	10	349	7	687	-62.8114,-31.759	indel
Seq12_pilon	1009636	C	T	315.636	1	50000	11	0	0	10	351	-31.941,-35.3636,-3.8	snp
Seq4_pilon	391889	GT	G	320.443	1	50000	13	7	221	6	570	-52.25,-20.2057	indel
Seq4_pilon	1270720	CT	C	326.886	1	50000	15	8	272	7	629	-57.5086,-24.82	indel
Seq11_pilon	85284	AT	A	328.21	1	50000	16	9	282	7	640	-58.5143,-25.6933	indel
Seq3_pilon	8006	CT	C	330.057	1	50000	14	7	244	7	605	-55.3143,-22.3086	indel
Seq14_pilon	481182	T	A	338.821	1	50000	18	4	76	14	451	-40.9121,-7.03	snp
Seq11_pilon	343257	GA	G	339.605	1	50000	13	7	184	6	554	-50.7833,-16.8229	indel
Seq12_pilon	335598	GA	G	339.697	1	50000	19	11	340	8	711	-64.8788,-30.9091	indel
Seq4_pilon	541679	T	C	349.25	1	50000	14	0	0	14	385	-34.925,0	snp
Seq16_pilon	137074	GT	G	355.315	1	50000	19	11	371	8	759	-69.2588,-33.7273	indel
Seq10_pilon	110664	G	GA	357.873	1	50000	14	7	208	6	599	-73.2508,-55.5886,-19.8013	indel
Seq10_pilon	717281	C	CT	364.088	1	50000	15	7	247	7	646	-81.0079,-61.7763,-25.3675	indel
Seq7_pilon	939035	G	A	367.208	1	50000	13	0	0	11	408	-40.4208,-43.7508,-7.03	snp
Seq5_pilon	116963	C	CT	369.026	1	50000	17	9	271	8	675	-61.5938,-24.6911	indel
Seq16_pilon	99679	CT	C	369.874	1	50000	19	11	359	8	763	-69.6238,-32.6364	indel
Seq12_pilon	915002	A	AT	376.144	1	50000	26	16	569	10	980	-89.18,-51.5656	indel
Seq7_pilon	840163	GA	G	378.513	1	50000	20	12	396	8	809	-73.8213,-35.97	indel
Seq10_pilon	100269	A	AT	380.586	1	50000	23	14	394	9	810	-73.8,-35.7414	indel
Seq14_pilon	519030	T	G	386.042	1	50000	12	0	0	12	425	-38.6042,0	snp
Seq13_pilon	354001	AT	A	389.575	1	50000	18	10	340	8	766	-69.8975,-30.94	indel
Seq12_pilon	278523	CA	C	393.143	1	50000	14	7	253	7	683	-62.4457,-23.1314	indel
Seq16_pilon	794284	G	GA	398.235	1	50000	16	8	244	7	680	-83.776,-65.0613,-25.2378	indel
Seq13_pilon	501085	GA	G	405.029	1	50000	14	7	243	7	686	-62.72,-22.2171	indel
Seq10_pilon	280000	CA	C	410.4	1	50000	10	4	142	6	591	-54.175,-13.135	indel
Seq11_pilon	259462	C	A	412.669	1	50000	17	1	10	15	467	-43.2281,-44.4969,-3.23	snp
Seq16_pilon	47145	AT	A	413.032	1	50000	16	9	217	7	668	-61.0743,-19.7711	indel
Seq10_pilon	284567	AT	A	413.655	1	50000	13	6	217	7	670	-61.2571,-19.8917	indel
Seq14_pilon	322582	A	AT	413.807	1	50000	17	9	320	8	773	-70.5363,-29.1556	indel
Seq4_pilon	932875	AT	A	415.213	1	50000	19	9	261	8	717	-89.3783,-66.794,-25.2727	indel
Seq10_pilon	465405	A	G	415.664	1	50000	14	0	0	13	462	-41.9354,-45.2664,-3.7	snp
Seq10_pilon	114223	A	AT	422.711	1	50000	19	10	336	8	799	-102.781,-81.2711,-39	indel
Seq14_pilon	430857	A	G	424.008	1	50000	17	0	0	14	472	-48.3938,-54.5341,-12.1333	snp
Seq7_pilon	1043634	A	G	424.213	1	50000	15	0	0	14	472	-42.8171,-46.4213,-4	snp
Seq9_pilon	26231	CT	C	429.157	1	50000	13	6	234	7	704	-64.3657,-21.45	indel
Seq1_pilon	128875	A	G	430.246	1	50000	13	0	0	13	474	-43.0246,0	snp
Seq15_pilon	722906	TG	T	432.406	1	50000	42	27	893	15	1367	-123.941,-80.7007	indel
Seq4_pilon	726500	GA	G	433.852	1	50000	15	8	269	7	743	-67.9314,-24.5463	indel
Seq10_pilon	606693	C	CA	435.75	1	50000	14	6	207	7	685	-80.9662,-65.335,-21.76	indel
Seq2_pilon	311254	CT	C	438.27	1	50000	19	11	347	8	826	-75.3725,-31.5455	indel
Seq14_pilon	717417	G	A	439.057	1	50000	14	0	0	14	484	-43.9057,0	snp
Seq5_pilon	149094	GA	G	441.6	1	50000	14	7	234	7	717	-65.5543,-21.3943	indel
Seq16_pilon	757500	GA	G	442.094	1	50000	21	12	402	9	886	-80.7244,-36.515	indel
Seq6_pilon	37987	CT	C	449.925	1	50000	20	11	370	9	863	-78.6289,-33.6364	indel
Seq13_pilon	776796	A	AT	451.211	1	50000	17	9	314	8	808	-73.73,-28.6089	indel
Seq2_pilon	718389	T	TA	462.162	1	50000	15	6	207	8	715	-83.6386,-65.8733,-19.6571	indel
Seq8_pilon	166608	TA	T	462.179	1	50000	13	6	189	7	695	-63.5429,-17.325	indel
Seq7_pilon	794760	GT	G	469.943	1	50000	14	7	236	7	750	-68.5714,-21.5771	indel
Seq7_pilon	482499	G	GC	471.104	1	50000	14	6	158	8	675	-61.5938,-14.4833	indel
Seq5_pilon	533456	AT	A	471.529	1	50000	23	13	459	10	976	-88.816,-41.6631	indel
Seq5_pilon	117646	G	T	478.16	1	50000	45	14	444	28	975	-130.837,-97.3677,-49.5518	snp
Seq8_pilon	169108	GA	G	478.541	1	50000	15	8	207	7	730	-66.7429,-18.8888	indel
Seq13_pilon	272004	G	A	485.553	1	50000	17	0	0	17	536	-48.5553,0	snp
Seq15_pilon	349855	GA	G	491.817	1	50000	14	6	224	8	764	-69.715,-20.5333	indel
Seq3_pilon	242568	A	G	492.35	1	50000	21	1	27	17	573	-55.3116,-57.4675,-8.2325	snp
Seq9_pilon	194916	TA	T	496.989	1	50000	16	7	244	8	790	-93.7493,-81.0889,-31.39	indel
Seq3_pilon	241622	G	T	505.85	1	50000	19	0	0	17	562	-52.975,-56.76,-6.175	snp
Seq14_pilon	198790	A	AT	509.313	1	50000	11	3	102	7	662	-69.524,-63.4188,-12.4875	indel
Seq7_pilon	649207	G	C	510.861	1	50000	18	0	0	17	568	-51.4541,-54.7861,-3.7	snp
Seq8_pilon	117498	GA	G	511.555	1	50000	13	6	187	7	747	-68.2971,-17.1417	indel
Seq13_pilon	514430	AT	A	521.579	1	50000	11	4	130	7	702	-64.1829,-12.025	indel
Seq13_pilon	739337	T	C	525.789	1	50000	19	0	0	18	585	-52.975,-56.5789,-4	snp
Seq2_pilon	139644	A	AT	526.094	1	50000	23	12	351	10	929	-115.782,-94.0909,-41.4815	indel
Seq12_pilon	613775	T	G	528.129	1	50000	17	0	0	17	583	-52.8129,0	snp
Seq13_pilon	785533	C	CT	533.507	1	50000	13	4	110	8	697	-73.3025,-66.9667,-13.616	indel
Seq4_pilon	211331	GA	G	535.08	1	50000	20	10	344	10	932	-84.812,-31.304	indel
Seq15_pilon	124257	CT	C	540.847	1	50000	17	8	254	9	848	-77.2622,-23.1775	indel
Seq3_pilon	332210	TA	T	541.33	1	50000	16	7	246	9	841	-76.6244,-22.4914	indel
Seq1_pilon	204689	A	AT	549.911	1	50000	15	7	183	8	786	-71.7225,-16.7314	indel
Seq16_pilon	814611	GA	G	551.291	1	50000	12	5	164	7	768	-70.2171,-15.088	indel
Seq3_pilon	56723	CA	C	556.28	1	50000	12	2	70	7	683	-73.164,-69.888,-14.26	indel
Seq16_pilon	94154	AT	A	556.486	1	50000	26	14	492	12	1104	-100.28,-44.6314	indel
Seq15_pilon	507232	C	CA	558.998	1	50000	15	7	204	8	817	-74.5513,-18.6514	indel
Seq15_pilon	333707	GA	G	560.549	1	50000	16	7	219	9	835	-76.0778,-20.0229	indel
Seq2_pilon	705645	TA	T	561.636	1	50000	19	10	352	9	968	-88.1956,-32.032	indel
Seq13_pilon	542288	A	G	564.758	1	50000	19	0	0	18	627	-56.7783,-59.4758,-3	snp
Seq8_pilon	229358	GA	G	566.674	1	50000	23	12	410	11	1033	-93.9091,-37.2417	indel
Seq15_pilon	141746	GA	G	567.563	1	50000	12	4	147	8	771	-70.3538,-13.5975	indel
Seq15_pilon	1008389	AT	A	570.489	1	50000	16	7	245	9	872	-79.4489,-22.4	indel
Seq4_pilon	32971	C	G	570.71	1	50000	20	0	0	18	634	-60.1095,-63.531,-6.46	snp
Seq9_pilon	116372	GT	G	571.776	1	50000	17	8	289	9	917	-83.5489,-26.3713	indel
Seq7_pilon	606238	T	TA	587.173	1	50000	17	7	240	9	886	-102.044,-83.811,-25.0938	indel
Seq11_pilon	601725	AT	A	600.99	1	50000	25	14	508	11	1168	-106.182,-46.0829	indel
Seq12_pilon	218922	G	GA	607.185	1	50000	17	7	247	9	915	-105.306,-86.086,-25.3675	indel
Seq15_pilon	771028	A	AT	607.618	1	50000	13	5	136	8	803	-73.2738,-12.512	indel
Seq16_pilon	819422	GA	G	612.119	1	50000	23	12	397	11	1070	-97.2727,-36.0608	indel
Seq13_pilon	209396	CT	C	626.308	1	50000	25	12	371	12	1061	-129.477,-97.2138,-34.5831	indel
Seq11_pilon	138146	CT	C	627.9	1	50000	20	10	347	10	1037	-94.367,-31.577	indel
Seq3_pilon	78175	CA	C	630.265	1	50000	13	5	158	8	850	-77.5625,-14.536	indel
Seq14_pilon	729746	GT	G	638.914	1	50000	16	7	216	9	918	-83.64,-19.7486	indel
Seq4_pilon	1455603	GT	G	640.88	1	50000	18	8	268	10	973	-88.543,-24.455	indel
Seq12_pilon	447413	C	CA	641.591	1	50000	14	5	186	9	892	-81.2711,-17.112	indel
Seq13_pilon	370941	CA	C	643.908	1	50000	27	15	485	12	1193	-108.364,-43.9733	indel
Seq11_pilon	652696	AT	A	646.044	1	50000	21	10	352	11	1063	-96.6364,-32.032	indel
Seq4_pilon	814881	T	G	647.242	1	50000	24	0	0	22	720	-67.4643,-72.5142,-7.79	snp
Seq15_pilon	978501	C	CT	650.201	1	50000	30	16	512	13	1228	-157.2,-114.391,-49.3706	indel
Seq13_pilon	790889	G	A	652.505	1	50000	20	0	0	20	721	-65.2505,0	snp
Seq13_pilon	306008	AT	A	653.67	1	50000	18	8	248	10	967	-87.997,-22.63	indel
Seq15_pilon	129487	CT	C	656.985	1	50000	24	12	396	11	1119	-137.009,-102.551,-36.8523	indel
Seq17_pilon	71014	C	CG	666.273	1	50000	50	30	967	18	1701	-246.798,-163.081,-96.4538	indel
Seq16_pilon	444208	T	TA	671.825	1	50000	18	8	266	10	1005	-91.455,-24.2725	indel
Seq4_pilon	582241	GT	G	672.631	1	50000	14	5	179	9	919	-83.7311,-16.468	indel
Seq16_pilon	453169	CT	C	675.155	1	50000	21	10	329	11	1072	-97.4545,-29.939	indel
Seq12_pilon	54338	A	AT	678.525	1	50000	24	12	399	12	1146	-104.095,-36.2425	indel
Seq13_pilon	732289	A	AT	681.26	1	50000	19	9	297	10	1046	-95.186,-27.06	indel
Seq11_pilon	230764	TA	T	681.491	1	50000	21	10	360	11	1110	-100.909,-32.76	indel
Seq2_pilon	626084	A	C	689.936	1	50000	25	0	0	22	767	-78.12,-79.9136,-10.92	snp
Seq12_pilon	139585	CT	C	694.545	1	50000	22	11	364	11	1128	-102.545,-33.0909	indel
Seq3_pilon	169418	T	TA	697.17	1	50000	14	4	140	9	908	-95.1262,-85.449,-15.732	indel
Seq3_pilon	41617	C	CT	700.421	1	50000	16	5	188	9	960	-104.14,-94.6364,-24.5943	indel
Seq4_pilon	273901	TC	T	702.2	1	50000	11	3	108	8	880	-80.3,-10.08	indel
Seq15_pilon	660411	G	T	709.842	1	50000	24	0	0	23	789	-71.353,-74.6842,-3.7	snp
Seq11_pilon	648347	TA	T	714.464	1	50000	30	16	608	14	1395	-126.546,-55.1	indel
Seq12_pilon	640348	G	GT	718.492	1	50000	24	12	420	12	1211	-109.999,-38.15	indel
Seq12_pilon	619521	GT	G	721.885	1	50000	19	8	247	11	1042	-94.7273,-22.5388	indel
Seq12_pilon	384848	TA	T	729.035	1	50000	19	8	283	11	1086	-98.7273,-25.8238	indel
Seq11_pilon	254145	A	AT	729.33	1	50000	16	4	130	11	935	-96.56,-87.745,-14.812	indel
Seq4_pilon	854201	TA	T	734.329	1	50000	17	7	222	10	1030	-93.73,-20.2971	indel
Seq4_pilon	422309	G	A	739.158	1	50000	24	0	0	23	821	-74.247,-77.2158,-3.3	snp
Seq9_pilon	246346	GT	G	739.457	1	50000	13	3	94	10	909	-82.719,-8.77333	indel
Seq5_pilon	404406	GA	G	744.463	1	50000	19	8	291	11	1111	-101,-26.5538	indel
Seq11_pilon	81894	CT	C	747.11	1	50000	18	6	218	11	1042	-114.141,-95.5567,-20.8457	indel
Seq5_pilon	132561	TA	T	760.283	1	50000	16	6	208	10	1045	-95.095,-19.0667	indel
Seq5_pilon	275466	GA	G	764.3	1	50000	22	10	310	12	1152	-104.64,-28.21	indel
Seq10_pilon	194756	C	CA	781.225	1	50000	23	9	335	12	1197	-141.38,-112.304,-34.1818	indel
Seq9_pilon	270299	AT	A	782.41	1	50000	22	10	344	12	1206	-109.545,-31.304	indel
Seq11_pilon	519666	G	GT	783.392	1	50000	29	12	401	13	1266	-150.697,-126.642,-48.3031	indel
Seq15_pilon	94095	TA	T	783.972	1	50000	21	9	298	12	1162	-105.548,-27.1511	indel
Seq8_pilon	297546	C	CA	793.067	1	50000	11	2	60	9	933	-85.0067,-5.7	indel
Seq11_pilon	9215	T	TA	800.116	1	50000	28	15	428	13	1309	-118.817,-38.8053	indel
Seq16_pilon	940310	AT	A	804	1	50000	17	6	192	11	1078	-98,-17.6	indel
Seq11_pilon	394139	GT	G	807.846	1	50000	26	13	480	13	1370	-124.354,-43.5692	indel
Seq12_pilon	441932	CA	C	819.646	1	50000	26	13	405	13	1308	-118.726,-36.7615	indel
Seq17_pilon	16508	T	TG	820.903	1	50000	56	35	1024	20	1929	-266.307,-177.333,-95.2431	indel
Seq14_pilon	382884	TA	T	822.4	1	50000	19	7	245	12	1152	-104.64,-22.4	indel
Seq17_pilon	67601	T	TC	825.566	1	50000	44	23	680	20	1592	-205.008,-146.843,-64.2863	indel
Seq7_pilon	101852	G	T	859.281	1	50000	27	0	0	26	955	-86.3173,-89.8281,-3.9	snp
Seq15_pilon	14227	G	GA	862.698	1	50000	14	3	38	10	988	-93.1292,-91.7273,-5.4575	indel
Seq13_pilon	406580	TA	T	868.192	1	50000	15	3	118	11	1077	-108.404,-102.914,-16.095	indel
Seq4_pilon	426872	C	CT	868.852	1	50000	27	12	385	15	1344	-121.856,-34.9708	indel
Seq14_pilon	284126	C	CA	873.418	1	50000	23	7	257	12	1222	-133.888,-122.978,-35.6364	indel
Seq13_pilon	395193	TA	T	877.015	1	50000	17	6	154	11	1120	-101.818,-14.1167	indel
Seq15_pilon	149509	CG	TT	885.989	1	50000	47	20	700	24	1681	-225.634,-165.016,-76.4174	mnp
Seq5_pilon	490888	GA	G	888.967	1	50000	23	9	313	13	1294	-145.36,-118.836,-29.939	indel
Seq4_pilon	1004161	GT	G	893.418	1	50000	13	2	72	11	1058	-96.1818,-6.84	indel
Seq11_pilon	366138	T	TA	903.488	1	50000	27	12	409	14	1406	-164.048,-130.923,-40.5738	indel
Seq7_pilon	282655	CA	C	910.31	1	50000	11	1	37	10	1041	-94.731,-3.7	indel
Seq12_pilon	71665	CA	C	911.489	1	50000	15	4	135	11	1140	-103.636,-12.4875	indel
Seq15_pilon	221002	GA	G	915.199	1	50000	19	7	220	12	1229	-111.634,-20.1143	indel
Seq15_pilon	723017	AG	A	917.991	1	50000	28	13	451	15	1464	-132.736,-40.9369	indel
Seq9_pilon	346441	T	TA	920.777	1	50000	25	9	321	13	1338	-150.064,-130.409,-38.3317	indel
Seq16_pilon	843157	GA	G	920.85	1	50000	21	8	284	13	1300	-118,-25.915	indel
Seq7_pilon	525941	AT	A	940.184	1	50000	26	11	386	15	1424	-129.109,-35.0909	indel
Seq16_pilon	45047	T	TA	944.775	1	50000	29	13	479	15	1522	-180.805,-139.563,-45.085	indel
Seq17_pilon	31270	A	AG	946.604	1	50000	16	2	61	12	1107	-105.954,-106.408,-11.7475	indel
Seq7_pilon	85087	GA	G	964.883	1	50000	27	12	430	15	1495	-135.547,-39.0583	indel
Seq5_pilon	432543	GA	G	973.346	1	50000	24	10	324	14	1398	-126.819,-29.484	indel
Seq13_pilon	309091	G	GA	974.364	1	50000	20	6	207	13	1283	-134.884,-119.471,-22.0343	indel
Seq5_pilon	52798	CA	C	979.003	1	50000	25	11	365	14	1445	-131.082,-33.1818	indel
Seq11_pilon	317809	GT	G	982.771	1	50000	22	8	276	14	1361	-123.462,-25.185	indel
Seq4_pilon	887372	AT	A	997.339	1	50000	22	8	266	14	1367	-124.006,-24.2725	indel
Seq11_pilon	662452	CA	C	997.981	1	50000	23	7	251	15	1354	-145.18,-123.341,-23.5425	indel
Seq12_pilon	270381	G	GA	998.114	1	50000	18	5	174	12	1276	-131.353,-121.903,-22.0917	indel
Seq12_pilon	388302	C	CA	1008.39	1	50000	22	7	250	14	1364	-146.029,-126.48,-25.6413	indel
Seq16_pilon	386208	GA	G	1025.84	1	50000	17	4	149	13	1282	-116.366,-13.7825	indel
Seq12_pilon	261427	GT	G	1032.4	1	50000	21	7	244	14	1384	-125.549,-22.3086	indel
Seq13_pilon	354091	GA	G	1037.26	1	50000	18	5	166	13	1311	-118.998,-15.272	indel
Seq11_pilon	389054	TG	T	1038.86	1	50000	15	2	75	13	1223	-111.011,-7.125	indel
Seq4_pilon	625873	C	CT	1055.78	1	50000	25	8	286	15	1453	-160.851,-136.154,-30.576	indel
Seq15_pilon	16214	G	GA	1056.9	1	50000	21	7	243	14	1410	-127.907,-22.2171	indel
Seq10_pilon	417934	TA	T	1057.83	1	50000	17	4	136	13	1304	-118.363,-12.58	indel
Seq6_pilon	38611	G	T	1069.08	1	50000	34	0	0	34	1184	-106.908,0	snp
Seq13_pilon	850826	T	TC	1072.78	1	50000	19	3	88	14	1274	-123.381,-120.894,-13.616	indel
Seq7_pilon	85322	AT	A	1093.41	1	50000	26	10	358	16	1566	-141.919,-32.578	indel
Seq4_pilon	964103	CT	C	1097.83	1	50000	21	7	228	14	1440	-130.629,-20.8457	indel
Seq13_pilon	893080	T	TA	1107.17	1	50000	15	2	48	13	1270	-115.277,-4.56	indel
Seq15_pilon	1075548	T	TA	1117.39	1	50000	22	6	197	15	1432	-147.386,-132.584,-20.8457	indel
Seq4_pilon	747077	T	TA	1122.17	1	50000	24	6	193	15	1434	-147.205,-138.912,-26.6956	indel
Seq5_pilon	259181	GA	G	1180.49	1	50000	19	4	148	15	1453	-131.739,-13.69	indel
Seq7_pilon	143278	CA	C	1188.42	1	50000	21	6	203	15	1516	-137.451,-18.6083	indel
Seq12_pilon	297074	AT	A	1198.05	1	50000	23	6	208	17	1533	-138.872,-19.0667	indel
Seq10_pilon	412354	CA	C	1207.82	1	50000	16	2	75	14	1410	-127.907,-7.125	indel
Seq10_pilon	477405	G	GA	1232.59	1	50000	22	5	181	15	1544	-156.113,-146.391,-23.1314	indel
Seq12_pilon	478814	GG	CC	1252.94	1	50000	56	10	350	25	1740	-188.697,-218.507,-93.2129	mnp
Seq12_pilon	477748	C	T	1262.44	1	50000	55	6	193	48	1596	-161.341,-149.558,-23.3143	snp
Seq4_pilon	1663	AG	A	1270.94	1	50000	15	1	29	14	1433	-129.994,-2.9	indel
Seq1_pilon	201812	TA	T	1289.64	1	50000	24	8	282	16	1707	-154.697,-25.7325	indel
Seq13_pilon	85391	A	AT	1304.32	1	50000	23	7	198	16	1639	-148.534,-18.1029	indel
Seq2_pilon	718555	T	TA	1391.23	1	50000	29	9	325	18	1864	-197.821,-173.941,-34.8182	indel
Seq9_pilon	146032	GA	G	1410.21	1	50000	27	8	277	19	1837	-166.297,-25.2763	indel
Seq4_pilon	2456	GC	G	1432.23	1	50000	19	2	61	17	1645	-149.018,-5.795	indel
Seq13_pilon	98404	GT	G	1461.76	1	50000	23	5	175	18	1792	-162.276,-16.1	indel
Seq12_pilon	779727	TA	T	1499.21	1	50000	28	9	294	19	1952	-176.707,-26.7867	indel
Seq2_pilon	647340	TA	T	1510.2	1	50000	25	7	238	18	1908	-172.78,-21.76	indel
Seq3_pilon	277295	GC	G	1569.96	1	50000	20	2	47	18	1783	-161.461,-4.465	indel
Seq7_pilon	696565	G	GT	1583.98	1	50000	34	12	447	22	2200	-199,-40.6025	indel
Seq2_pilon	367733	G	GT	1591.38	1	50000	19	1	35	18	1796	-162.638,-3.5	indel
Seq4_pilon	2087	TG	T	1628.22	1	50000	19	1	38	18	1840	-166.622,-3.8	indel
Seq16_pilon	439723	GA	G	1644.09	1	50000	19	1	33	18	1852	-167.709,-3.3	indel
Seq4_pilon	626020	T	TA	1655.59	1	50000	29	8	263	20	2095	-213.062,-193.257,-27.6978	indel
Seq4_pilon	2127	TG	T	1719.76	1	50000	25	5	164	20	2067	-187.064,-15.088	indel
Seq14_pilon	10979	GT	G	1721.78	1	50000	19	1	35	18	1940	-175.678,-3.5	indel
Seq12_pilon	478016	TG	AA	1835.03	1	50000	180	101	3287	78	5322	-775.291,-485.061,-301.558	mnp
Seq8_pilon	206259	A	AT	1876.24	1	50000	41	13	404	25	2482	-265.696,-234.206,-46.5813	indel
Seq15_pilon	820678	T	TA	2236.26	1	50000	35	8	259	26	2736	-270.431,-250.868,-27.2422	indel
Seq4_pilon	2307	TA	T	2401.52	1	50000	26	0	0	26	2657	-240.152,0	indel
Seq12_pilon	478017	G	A	2569.71	1	50000	98	7	222	91	3077	-277.268,-20.2971	snp
Seq17_pilon	83443	A	T	2956.94	1	50000	107	1	41	97	3327	-331.187,-331.457,-35.763	snp
Seq7_pilon	624399	C	CT	3001.74	1	50000	61	18	615	42	3944	-411.07,-365.081,-64.9074	indel
Seq17_pilon	8298	A	AT	7680.64	1	50000	134	34	1179	94	9706	-996.232,-899.378,-131.314	indel
Seq12_pilon	477743	T	C	8256.32	1	50000	368	8	243	296	9417	-1070.69,-1055.13,-229.494	snp
Seq12_pilon	478150	C	T	46400.3	1	50000	1683	6	167	1555	51723	-5052.39,-5039.07,-399.046	snp

## Sheet: summary
	msh2Δ			R542L			G688D			A618V
	manual	snp-adjusted S288c	current	manual	snp-adjusted S288c	current	manual	snp-adjusted S288c	current	manual	snp-adjusted S288c	current
snp	7	138	44	4	108	31	15	126	53	8	64	35
mnp	0	30	2	0	19	3	0	13	3	0	6	1
indel	140	422	248	135	388	268	139	404	286	109	295	206
complex	0	29	1	0	10	1	0	11	1	0	2	2
